# Supplementary material for: The Transcriptome and Proteome of the Diatom Thalassiosira pseudonana Reveal a Diverse Phosphorus Stress Response
Source: PubMed Central journal article supplement (PMC3315573; doi:10.1371/journal.pone.0033768), 2012-03-29

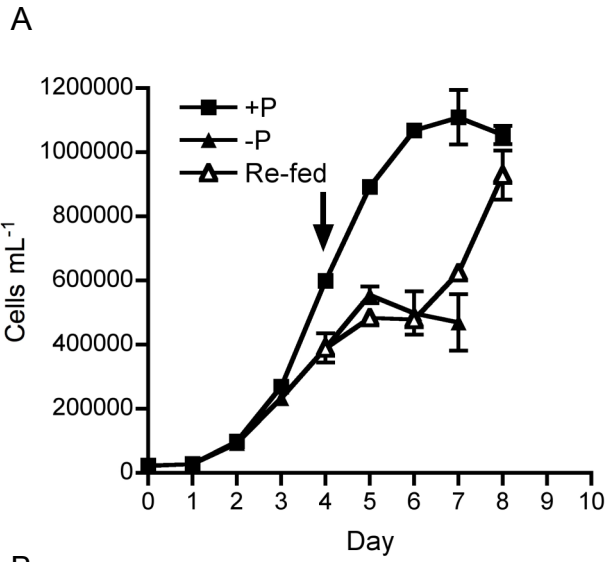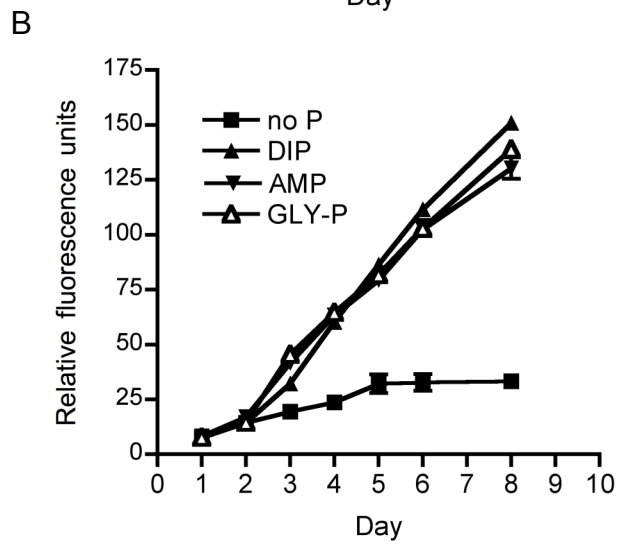

Supplement: pone.0033768.s001.pdf [file pone.0033768.s001.pdf]
