# Supplementary material for: The Transcriptome and Proteome of the Diatom Thalassiosira pseudonana Reveal a Diverse Phosphorus Stress Response
Source: PubMed Central journal article supplement (PMC3315573; doi:10.1371/journal.pone.0033768), 2012-03-29

Figure S2.

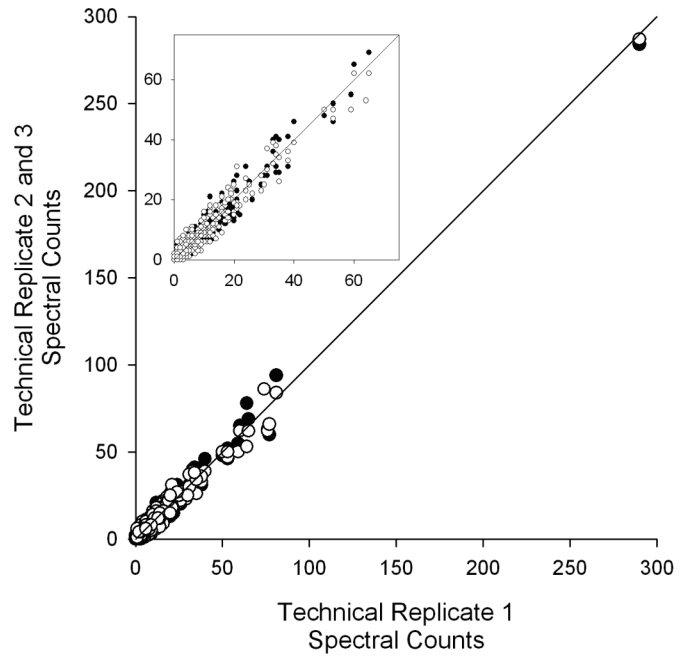

Supplement: pone.0033768.s002.pdf [file pone.0033768.s002.pdf]
