# Supplementary material for: The Transcriptome and Proteome of the Diatom Thalassiosira pseudonana Reveal a Diverse Phosphorus Stress Response
Source: PLoS One. 2012 Mar 29;7(3):e33768. doi: 10.1371/journal.pone.0033768 (PMC3315573; doi:10.1371/journal.pone.0033768)
Supplement: Table S2 — Detected transcripts, their annotation, abundance, and statistical significance. (XLS) [file pone.0033768.s004.xls]

## Sheet: ST2 mapped genes
Supplemental Table 2. Transcriptome tag counts, annotation, and statistics
Protein ID	gene ID	P ltd tag count	P ltd TPM	Rep tag count	Rep TPM	T-fold Ch L/R	T-fold Ch R/L	ASC fdr	GO name	KOG definition	EC definition
11637	7443642	7977	593.892	2	0.15967	3719.49	0.000268854	1.10501e-50	metabolism	NA	NA
31200	7445275	3701	275.541	1	0.079835	3451.38	0.000289739	1.10501e-50	protein amino acid dephosphorylation	Dual specificity phosphatase	NA
23858	7444937	74682	5560.11	59	4.71027	1180.42	0.000847153	1.10501e-50	glycerol metabolism	Glycerophosphoryl diester phosphodiesterase	NA
8240	7446993	609	45.3403	1	0.079835	567.926	0.00176079	4.27869e-33	NA	NA	NA
261067	7445522	1091	81.2255	3	0.239505	339.139	0.00294864	8.36115e-38	metabolism	Alkaline phosphatase	Alkaline phosphatase.
6820	7448990	4187	311.724	12	0.95802	325.384	0.00307329	1.10501e-50	biosynthesis	N-acetylglucosaminyltransferase complex, subunit PIG-A/SPT14, required for phosphatidylinositol biosynthesis/Sulfolipid synthase	NA
32716	7451278	1640	122.099	5	0.399175	305.878	0.00326928	1.10501e-50	cytoplasm	NA	NA
31875	7452139	2944	219.182	0	0	>=219.1822433	0	1.10501e-50	RNA binding	Translational repressor Pumilio/PUF3 and related RNA-binding proteins (Puf superfamily)	NA
2049	7452146	2456	182.85	11	0.878185	208.214	0.00480275	1.10501e-50	hydrolase activity	Purple acid phosphatase	NA
5476	7450091	1321	98.3491	11	0.878185	111.991	0.00892926	4.91647e-38	binding	Mitochondrial carnitine-acylcarnitine carrier protein	NA
7865	7444987	4642	345.599	60	4.7901	72.1486	0.0138603	1.10501e-50	NA	Defense-related protein containing SCP domain	NA
38194	7444247	5380	400.544	107	8.54235	46.8892	0.0213269	1.10501e-50	nucleotide catabolism	5' nucleotidase	5'-nucleotidase.
2141	7442213	69	5.13708	2	0.15967	32.1731	0.0310818	4.32884e-05	catalytic activity	NA	NA
264061	7447874	29	2.15906	1	0.079835	27.0441	0.0369767	0.10755	protein amino acid dephosphorylation	Dual specificity phosphatase	NA
36015	7444958	4525	336.888	162	12.9333	26.0482	0.0383904	1.53929e-37	integral to membrane	Peroxisomal membrane protein MPV17 and related proteins	NA
8004	7449328	14002	1042.46	517	41.2747	25.2565	0.0395937	1.10501e-50	NA	NA	NA
24127	7447030	587	43.7024	22	1.75637	24.8822	0.0401893	1.45385e-15	catalytic activity	NA	NA
38190	7442954	6889	512.889	279	22.274	23.0264	0.0434284	1.91967e-37	NA	Component of vacuolar transporter chaperone (Vtc) involved in vacuole fusion	NA
38597	7449465	44	3.27582	2	0.15967	20.5162	0.048742	0.00939212	catalytic activity	NA	NA
8092	7448087	107	7.9662	5	0.399175	19.9567	0.0501086	1.98781e-07	NA	Nucleolar GTPase/ATPase p130	NA
36411	7451061	19	1.41456	1	0.079835	17.7185	0.0564381	0.45598	protein kinase activity	Ribosomal protein S6 kinase and related proteins	NA
260835	7444164	1451	108.028	78	6.22713	17.3479	0.0576439	1.805e-29	NA	NA	NA
10936	7443000	111	8.264	6	0.47901	17.2523	0.0579634	1.97853e-07	NA	NA	NA
268403	7442421	18	1.34011	1	0.079835	16.786	0.0595735	0.508432	regulation of cell cycle	G1/S-specific cyclin D	NA
22030	7452751	6827	508.273	380	30.3373	16.7541	0.059687	5.38302e-37	catalytic activity	NA	NA
9633	7450527	35	2.60577	2	0.15967	16.3197	0.0612756	0.0546689	NA	NA	NA
6344	7453278	17	1.26566	1	0.079835	15.8534	0.0630779	0.564319	DNA binding	NA	NA
23285	7444596	81	6.03049	5	0.399175	15.1074	0.0661928	2.49858e-05	NA	Uncharacterized conserved protein	NA
32347	7450368	16	1.19121	1	0.079835	14.9209	0.0670202	0.621637	NA	NA	NA
25878	7448913	767	57.1035	48	3.83208	14.9014	0.0671076	2.32397e-15	NA	NA	NA
904	7447663	14	1.04231	1	0.079835	13.0558	0.0765945	0.737243	NA	Nuclear localization sequence binding protein	NA
33337	7446124	14	1.04231	1	0.079835	13.0558	0.0765945	0.737243	cAMP-dependent protein kinase complex	cAMP-dependent protein kinase types I and II, regulatory subunit	Protein kinase.
24435	7450800	76235	5675.73	5450	435.101	13.0446	0.0766598	1.17857e-32	phosphate transport	NA	NA
5658	7448199	78	5.80714	6	0.47901	12.1232	0.0824864	8.89848e-05	DNA binding	Predicted helicase	NA
10604	7444186	13	0.967856	1	0.079835	12.1232	0.0824864	0.792628	NA	Predicted oxidoreductase	NA
18846	7449446	13	0.967856	1	0.079835	12.1232	0.0824864	0.792628	NA	NA	NA
3625	7441934	348	25.9088	27	2.15555	12.0196	0.0831975	2.4907e-14	electron transporter activity	NADP/FAD dependent oxidoreductase	NADPH--ferrihemoprotein reductase.
31499	7445685	1039	77.3541	81	6.46664	11.962	0.0835979	2.63595e-15	protein amino acid dephosphorylation	Dual specificity phosphatase	NA
3300	7444710	472	35.1406	37	2.9539	11.8964	0.0840593	4.83452e-15	S-adenosylmethionine-dependent methyltransferase activity	NA	NA
8982	7449379	75297	5605.9	6029	481.325	11.6468	0.0858605	2.25726e-29	metalloendopeptidase activity	NA	NA
2483	7450369	12	0.893406	1	0.079835	11.1907	0.0893603	0.847747	NA	Dimeric dihydrodiol dehydrogenase	NA
7707	7452862	12	0.893406	1	0.079835	11.1907	0.0893603	0.847747	NA	NA	NA
3137	7442467	11	0.818955	1	0.079835	10.2581	0.097484	0.896971	NA	NA	NA
13740	7451160	11	0.818955	1	0.079835	10.2581	0.097484	0.896971	NA	Uncharacterized conserved protein	NA
38760	7449464	43	3.20137	4	0.31934	10.025	0.099751	0.0288094	catalytic activity	NA	NA
264757	7443657	3099	230.722	291	23.232	9.93122	0.100693	2.27091e-15	iron ion binding	NA	NA
4095	7446734	416	30.9714	40	3.1934	9.69857	0.103108	1.10814e-13	NA	NA	NA
6958	7444112	1584	117.93	155	12.3744	9.5301	0.104931	3.30377e-15	transcription factor activity	Heat shock transcription factor	NA
1961	7445107	140	10.4231	14	1.11769	9.32554	0.107232	2.46174e-07	monooxygenase activity	Kynurenine 3-monooxygenase and related flavoprotein monooxygenases	NA
37640	7450286	59	4.39258	6	0.47901	9.17012	0.10905	0.00349159	integral to membrane	NA	NA
264753	7443656	2909	216.576	302	24.1102	8.98278	0.111324	3.08544e-15	iron ion binding	NA	NA
31021	7447664	162	12.061	18	1.43703	8.39299	0.119147	1.50594e-07	electron transport	Sulfide:quinone oxidoreductase/flavo-binding protein	Oxidoreductases.
31515	7451421	18	1.34011	2	0.15967	8.39299	0.119147	0.599764	nucleic acid binding	E3 ubiquitin ligase interacting with arginine methyltransferase	NA
270201	7445311	798	59.4115	90	7.18515	8.26865	0.120939	5.33583e-15	NA	NA	NA
6932	7444099	502	37.3741	57	4.5506	8.21302	0.121758	2.05927e-13	NA	NA	NA
2390	7446536	2227	165.801	256	20.4378	8.11249	0.123267	4.07969e-15	histone acetyltransferase activity	Nuclear receptor coregulator SMRT/SMRTER, contains Myb-like domains	Histone acetyltransferase.
24958	7441865	34	2.53132	4	0.31934	7.92671	0.126156	0.12885	NA	Chitinase	NA
31316	7445620	17	1.26566	2	0.15967	7.92671	0.126156	0.655207	electron transporter activity	Sulfite reductase (ferredoxin)	With an iron-sulfur protein as acceptor.
1843	7449148	1130	84.1291	138	11.0172	7.63613	0.130956	5.27399e-15	NA	NA	NA
256250	7448743	262	19.506	32	2.55472	7.63529	0.130971	1.29446e-08	NA	NA	NA
23160	7445994	89	6.62609	11	0.878185	7.54521	0.132534	0.000187995	catalytic activity	NA	NA
2318	7446503	16	1.19121	2	0.15967	7.46044	0.13404	0.710983	NA	Chromatin remodeling complex WSTF-ISWI, large subunit (contains heterochromatin localization, PHD and BROMO domains)	NA
12120	7448914	16	1.19121	2	0.15967	7.46044	0.13404	0.710983	NA	NA	NA
31075	7449789	8	0.595604	1	0.079835	7.46044	0.13404	1	intracellular signaling cascade	NA	NA
11037	7444838	8	0.595604	1	0.079835	7.46044	0.13404	1	protein kinase activity	eIF-2alpha kinase PEK/EIF2AK3	NA
262975	7442753	8	0.595604	1	0.079835	7.46044	0.13404	1	proteolysis and peptidolysis	Leishmanolysin-like peptidase (Peptidase M8 family)	NA
30804	7449122	8	0.595604	1	0.079835	7.46044	0.13404	1	NA	NA	NA
5515	7453212	87	6.47719	11	0.878185	7.37566	0.135581	0.000286149	NA	SARM protein (with sterile alpha and armadillo motifs)	NA
1962	7452562	107	7.9662	14	1.11769	7.12738	0.140304	4.68417e-05	metalloendopeptidase activity	Peptidase family M48	NA
10292	7443984	94	6.99835	0	0	>=6.998346082	0	6.04908e-08	integral to membrane	K+-dependent Ca2+/Na+ exchanger NCKX1 and related proteins	NA
38428	7443638	15	1.11676	2	0.15967	6.99416	0.142976	0.766682	mitochondrial membrane	NA	Oxidoreductases.
8273	7447011	15	1.11676	2	0.15967	6.99416	0.142976	0.766682	NA	NA	NA
9091	7447544	277	20.6228	37	2.9539	6.98156	0.143235	1.49174e-08	protein tyrosine phosphatase activity	Phosphatidylinositol transfer protein SEC14 and related proteins	Protein-tyrosine-phosphatase.
3081	7452787	7	0.521153	1	0.079835	6.52788	0.153189	1	NA	NA	NA
261140	7452531	7	0.521153	1	0.079835	6.52788	0.153189	1	glycoprotein-N-acetylgalactosamine 3-beta-galactosyltransferase activity	Galactosyltransferases	Glycoprotein-N-acetylgalactosamine 3-beta-galactosyltransferase.
7689	7449842	7	0.521153	1	0.079835	6.52788	0.153189	1	NA	NA	NA
19048	7445509	7	0.521153	1	0.079835	6.52788	0.153189	1	protein kinase activity	Serine/threonine protein kinase	Phosphotransferases with an alcohol group as acceptor.
260785	7449132	7	0.521153	1	0.079835	6.52788	0.153189	1	electron transport	Ferric reductase, NADH/NADPH oxidase and related proteins	NA
4567	7446125	7	0.521153	1	0.079835	6.52788	0.153189	1	NA	NA	NA
263268	7447167	7	0.521153	1	0.079835	6.52788	0.153189	1	metalloendopeptidase activity	Leishmanolysin-like peptidase (Peptidase M8 family)	NA
30400	7444806	14	1.04231	2	0.15967	6.52788	0.153189	0.819188	NA	NA	NA
7035	7447071	14	1.04231	2	0.15967	6.52788	0.153189	0.819188	NA	Translation initiation factor 4F, ribosome/mRNA-bridging subunit (eIF-4G)	NA
263053	7446591	261	19.4316	38	3.03373	6.40518	0.156124	1.9948e-08	NA	Phosphatidylinositol transfer protein SEC14 and related proteins	NA
3196	7444013	473	35.2151	69	5.50862	6.39273	0.156428	7.03222e-09	NA	NA	NA
31298	7447647	20	1.48901	3	0.239505	6.21703	0.160849	0.579545	protein kinase activity	Ca2+/calmodulin-dependent protein kinase, EF-Hand protein superfamily	NA
1779	7449055	158	11.7632	24	1.91604	6.13932	0.162885	5.27063e-06	NA	Protein involved in vacuolar polyphosphate accumulation, contains SPX domain	NA
21753	7448748	9565	712.119	1467	117.118	6.08036	0.164464	5.78879e-15	NA	NA	NA
8067	7448072	13	0.967856	2	0.15967	6.0616	0.164973	0.871318	NA	NA	NA
35381	7450683	13	0.967856	2	0.15967	6.0616	0.164973	0.871318	NA	FOG: Leucine rich repeat	NA
10695	7442132	13	0.967856	2	0.15967	6.0616	0.164973	0.871318	NA	Uncharacterized conserved protein	NA
24757	7451616	395	29.4079	64	5.10944	5.75561	0.173744	1.58179e-08	NA	NA	NA
263386	7450161	49	3.64807	8	0.63868	5.7119	0.175073	0.0473306	hydrolase activity	Nucleoside phosphatase	Apyrase.
32493	7444652	1213	90.3084	201	16.0468	5.6278	0.177689	2.19985e-09	oxidoreductase activity	Aldo/keto reductase family proteins	D-xylose 1-dehydrogenase (NADP+).
899	7451500	4564	339.792	759	60.5948	5.60761	0.178329	2.9052e-13	proteolysis and peptidolysis	NA	NA
6606	7446376	18	1.34011	3	0.239505	5.59533	0.178721	0.686753	GTP binding	Predicted GTP-binding protein (ODN superfamily)	NA
3321	7444079	12	0.893406	2	0.15967	5.59533	0.178721	0.916709	myosin ATPase activity	Myosin class II heavy chain	Myosin ATPase.
261566	7450433	12	0.893406	2	0.15967	5.59533	0.178721	0.916709	NA	Uncharacterized conserved protein	NA
263979	7445709	12	0.893406	2	0.15967	5.59533	0.178721	0.916709	protein kinase activity	STE20-like serine/threonine kinase MST	NA
1418	7453407	6	0.446703	1	0.079835	5.59533	0.178721	1	protein folding	Similar to cyclophilin-type peptidyl-prolyl cis-trans isomerase	NA
5784	7444911	6	0.446703	1	0.079835	5.59533	0.178721	1	NA	NA	NA
6974	7444119	6	0.446703	1	0.079835	5.59533	0.178721	1	NA	SNARE protein PEP12/VAM3/Syntaxin 7/Syntaxin 17	NA
8571	7445695	6	0.446703	1	0.079835	5.59533	0.178721	1	NA	NA	NA
12207	7452033	6	0.446703	1	0.079835	5.59533	0.178721	1	DNA-directed RNA polymerase activity	Serine/threonine protein kinase	DNA-directed RNA polymerase.
6711	7446183	6	0.446703	1	0.079835	5.59533	0.178721	1	NA	NA	NA
6287	7445998	6	0.446703	1	0.079835	5.59533	0.178721	1	NA	NA	NA
262593	7448174	6	0.446703	1	0.079835	5.59533	0.178721	1	NA	NA	NA
10928	7444780	6	0.446703	1	0.079835	5.59533	0.178721	1	potassium channel activity	NA	NA
24642	7445749	6	0.446703	1	0.079835	5.59533	0.178721	1	NA	NA	NA
7602	7452812	6	0.446703	1	0.079835	5.59533	0.178721	1	NA	NA	NA
7247	7450580	6	0.446703	1	0.079835	5.59533	0.178721	1	NA	NA	NA
37376	7451254	23	1.71236	4	0.31934	5.36219	0.186491	0.510207	motor activity	Myosin class V heavy chain	NA
264690	7443353	217	16.1558	38	3.03373	5.32538	0.18778	2.25967e-06	lipoate biosynthesis	Lipoyltransferase	NA
33104	7448749	211	15.7091	37	2.9539	5.31808	0.188038	3.00218e-06	L-serine biosynthesis	D-3-phosphoglycerate dehydrogenase, D-isomer-specific 2-hydroxy acid dehydrogenase superfamily	With NAD(+) or NADP(+) as acceptor.
6818	7448989	461	34.3217	81	6.46664	5.3075	0.188413	1.74502e-08	NA	NA	NA
35816	7449838	4468	332.645	786	62.7503	5.30109	0.188641	2.66796e-12	glyceraldehyde-3-phosphate dehydrogenase (phosphorylating) activity	Glyceraldehyde 3-phosphate dehydrogenase	Glyceraldehyde 3-phosphate dehydrogenase (phosphorylating).
16265	7443049	232	17.2725	42	3.35307	5.15125	0.194128	2.17027e-06	protein kinase activity	Ca2+/calmodulin-dependent protein kinase, EF-Hand protein superfamily	NA
11024	7450897	22	1.63791	4	0.31934	5.12905	0.194968	0.560786	intracellular	NA	NA
261255	7448652	11	0.818955	2	0.15967	5.12905	0.194968	0.958351	NA	Guanine nucleotide exchange factor	NA
23904	7444984	11	0.818955	2	0.15967	5.12905	0.194968	0.958351	NA	Predicted oxidoreductase	NA
263184	7449252	11	0.818955	2	0.15967	5.12905	0.194968	0.958351	chitinase activity	Predicted chitinase	NA
7796	7444952	148	11.0187	27	2.15555	5.11178	0.195627	5.04946e-05	NA	Tousled-like protein kinase	NA
2642	7443058	411	30.5992	75	5.98763	5.1104	0.195679	3.13525e-08	NA	Serine proteinase inhibitor (KU family) with thrombospondin repeats	NA
25389	7444793	98	7.29615	18	1.43703	5.07724	0.196957	0.00118473	NA	NA	NA
3040	7452132	97	7.2217	18	1.43703	5.02543	0.198988	0.0013392	NA	NA	NA
264064	7447881	16	1.19121	3	0.239505	4.97362	0.201061	0.792911	transcription factor activity	Cytoskeleton-associated protein and related proteins	NA
1871	7445507	16	1.19121	3	0.239505	4.97362	0.201061	0.792911	NA	NA	NA
25572	7448480	155	11.5398	30	2.39505	4.8182	0.207546	6.40258e-05	N-acetyltransferase activity	Succinyl-CoA synthetase, alpha subunit	Acetate--CoA ligase (ADP-forming).
21224	7450204	41	3.05247	8	0.63868	4.77934	0.209234	0.149249	nucleic acid binding	FOG: RRM domain	NA
3601	7451267	96	7.14725	19	1.51687	4.71185	0.212231	0.00233849	potassium channel activity	Voltage-gated K+ channel KCNQ	NA
5188	7451774	156	11.6143	31	2.47489	4.69285	0.21309	8.83375e-05	magnesium ion binding	Inorganic pyrophosphatase/Nucleosome remodeling factor, subunit NURF38	Inorganic pyrophosphatase.
32691	7441922	15	1.11676	3	0.239505	4.66277	0.214465	0.844335	protein binding	Polymerase delta-interacting protein PDIP1 and related proteins, contain BTB/POZ domain	NA
19431	7447054	120	8.93406	24	1.91604	4.66277	0.214465	0.00055106	membrane	NA	NA
262734	7448416	30	2.23351	6	0.47901	4.66277	0.214465	0.354972	catalytic activity	Phosphatidylglycerolphosphate synthase	CDP-diacylglycerol--serine O-phosphatidyltransferase.
5223	7446408	10	0.744505	2	0.15967	4.66277	0.214465	0.98369	NA	NADH pyrophosphatase I of the Nudix family of hydrolases	NA
31932	7450356	10	0.744505	2	0.15967	4.66277	0.214465	0.98369	nucleic acid binding	Mitochondrial RNA helicase SUV3, DEAD-box superfamily	NA
10983	7450878	5	0.372252	1	0.079835	4.66277	0.214465	1	calcium ion binding	NA	NA
37432	7451596	5	0.372252	1	0.079835	4.66277	0.214465	1	nucleosome	Histones H3 and H4	NA
31598	7447596	5	0.372252	1	0.079835	4.66277	0.214465	1	protein folding	U-snRNP-associated cyclophilin type peptidyl-prolyl cis-trans isomerase	Peptidylprolyl isomerase.
263228	7447114	5	0.372252	1	0.079835	4.66277	0.214465	1	NA	NA	NA
5734	7442269	5	0.372252	1	0.079835	4.66277	0.214465	1	NA	NA	NA
10148	7451893	5	0.372252	1	0.079835	4.66277	0.214465	1	NA	NA	NA
1586	7443141	5	0.372252	1	0.079835	4.66277	0.214465	1	NA	NA	NA
261251	7448647	5	0.372252	1	0.079835	4.66277	0.214465	1	NA	Sulfotransferase	NA
3698	7449518	5	0.372252	1	0.079835	4.66277	0.214465	1	transcription factor activity	Heat shock transcription factor	NA
263154	7444098	5	0.372252	1	0.079835	4.66277	0.214465	1	transcription factor activity	Heat shock transcription factor	NA
261769	7444763	5	0.372252	1	0.079835	4.66277	0.214465	1	NA	Nucleoside phosphatase	NA
11626	7447781	5	0.372252	1	0.079835	4.66277	0.214465	1	transporter activity	NA	NA
17946	7452952	5	0.372252	1	0.079835	4.66277	0.214465	1	hydroxyacylglutathione hydrolase activity	Glyoxylase	Hydroxyacylglutathione hydrolase.
10068	7444294	5	0.372252	1	0.079835	4.66277	0.214465	1	NA	NA	NA
6819	7446239	706	52.562	144	11.4962	4.57211	0.218718	2.08885e-08	phosphatidylserine decarboxylase activity	Phosphatidylserine decarboxylase	NA
10938	7444784	534	39.7566	109	8.70202	4.56866	0.218883	1.24703e-07	NA	Serine/threonine protein kinase	NA
20718	7445291	44	3.27582	9	0.718515	4.55915	0.219339	0.130656	NA	Uncharacterized conserved protein	NA
7135	7450678	77	5.73269	16	1.27736	4.48792	0.22282	0.0119473	NA	NA	NA
6517	7444599	24	1.78681	5	0.399175	4.47626	0.223401	0.543339	NA	Oxidation resistance protein	NA
263105	7448975	52	3.87143	11	0.878185	4.40844	0.226838	0.0777558	catalytic activity	Long-chain acyl-CoA synthetases (AMP-forming)	Long-chain-fatty-acid--CoA ligase.
3765	7449551	33	2.45687	7	0.558845	4.39633	0.227463	0.311388	NA	NA	NA
21360	7446651	14	1.04231	3	0.239505	4.35192	0.229784	0.890975	NA	NA	NA
11926	7448238	14	1.04231	3	0.239505	4.35192	0.229784	0.890975	NA	NA	NA
14727	7452412	14	1.04231	3	0.239505	4.35192	0.229784	0.890975	ATP binding	Pyruvate carboxylase	Methylcrotonyl-CoA carboxylase.
7268	7450588	152	11.3165	33	2.63456	4.2954	0.232807	0.000294715	ATP binding	Plasma membrane H+-transporting ATPase	Proton-exporting ATPase.
38051	7444813	77	5.73269	17	1.3572	4.22392	0.236747	0.0162445	catalytic activity	Fructose-6-phosphate 2-kinase/fructose-2,6-biphosphatase	NA
10723	7453079	380	28.2912	84	6.70614	4.2187	0.23704	3.42958e-06	NA	NA	NA
932	7445251	27	2.01016	6	0.47901	4.19649	0.238294	0.481166	NA	Choline transporter-like protein	NA
9023	7449402	9	0.670054	2	0.15967	4.19649	0.238294	1	NA	NA	NA
263033	7446364	9	0.670054	2	0.15967	4.19649	0.238294	1	DNA binding	DNA polymerase theta/eta, DEAD-box superfamily	DNA-directed DNA polymerase.
2944	7450450	9	0.670054	2	0.15967	4.19649	0.238294	1	S-adenosylmethionine-dependent methyltransferase activity	Predicted methyltransferase	NA
11761	7443864	9	0.670054	2	0.15967	4.19649	0.238294	1	fructose-bisphosphate aldolase activity	Fructose-biphosphate aldolase	NA
32996	7443845	9	0.670054	2	0.15967	4.19649	0.238294	1	tRNA processing	Uncharacterized conserved protein	Oxidoreductases.
1017	7449097	9	0.670054	2	0.15967	4.19649	0.238294	1	NA	NA	NA
17651	7448902	9	0.670054	2	0.15967	4.19649	0.238294	1	catalytic activity	Phosphoglycerate mutase	Phosphoglycerate mutase.
264740	7447779	9	0.670054	2	0.15967	4.19649	0.238294	1	ATP binding	Lipid exporter ABCA1 and related proteins, ABC superfamily	NA
27834	7447909	9	0.670054	2	0.15967	4.19649	0.238294	1	RNA binding	tRNA nucleotidyltransferase/poly(A) polymerase	NA
23952	7443514	31	2.30797	7	0.558845	4.12988	0.242138	0.384099	NA	Nuclear receptor coregulator SMRT/SMRTER, contains Myb-like domains	NA
262849	7445935	115	8.56181	26	2.07571	4.12476	0.242438	0.00224769	chromate transporter activity	NA	NA
3223	7444028	22	1.63791	5	0.399175	4.10324	0.24371	0.643517	NA	NA	NA
33685	7443705	22	1.63791	5	0.399175	4.10324	0.24371	0.643517	methylmalonyl-CoA mutase activity	NA	Methylmalonyl-CoA mutase.
22860	7445223	2947	219.406	675	53.8886	4.07146	0.245612	2.10881e-08	NA	NA	NA
10552	7450332	13	0.967856	3	0.239505	4.04107	0.247459	0.935366	NA	NA	NA
10724	7442150	13	0.967856	3	0.239505	4.04107	0.247459	0.935366	NA	Ankyrin	NA
263035	7446367	13	0.967856	3	0.239505	4.04107	0.247459	0.935366	catalytic activity	Phosphoglycerate mutase	Phosphoglycerate mutase.
11825	7442851	13	0.967856	3	0.239505	4.04107	0.247459	0.935366	NA	Nucleolar GTPase/ATPase p130	NA
269100	7445975	13	0.967856	3	0.239505	4.04107	0.247459	0.935366	protein kinase activity	Serine/threonine-protein kinase involved in autophagy	NA
3320	7444720	13	0.967856	3	0.239505	4.04107	0.247459	0.935366	NA	NA	NA
7482	7450124	159	11.8376	37	2.9539	4.00746	0.249534	0.000479372	NA	NA	NA
16743	7449203	17	1.26566	4	0.31934	3.96336	0.252311	0.817795	metalloendopeptidase activity	Peptidase family M48	NA
6568	7446551	17	1.26566	4	0.31934	3.96336	0.252311	0.817795	catalytic activity	Branched chain aminotransferase BCAT1, pyridoxal phosphate enzymes type IV superfamily	NA
9111	7447557	21	1.56346	5	0.399175	3.91673	0.255315	0.693807	NA	Chitinase	NA
6808	7448984	46	3.42472	11	0.878185	3.89977	0.256425	0.167147	NA	NA	NA
1668	7449103	125	9.30631	30	2.39505	3.88564	0.257358	0.00246562	protein folding	Molecular chaperone (DnaJ superfamily)	NA
10092	7444305	393	29.259	95	7.58433	3.85783	0.259213	9.80278e-06	NA	NA	NA
31674	7452524	118	8.78516	29	2.31522	3.79453	0.263537	0.00382397	NA	NA	NA
22875	7449173	12	0.893406	3	0.239505	3.73022	0.268081	0.967637	NA	NA	NA
9724	7450841	12	0.893406	3	0.239505	3.73022	0.268081	0.967637	structural molecule activity	Teneurin-1 and related extracellular matrix proteins, contain EGF-like repeats	NA
3139	7442468	12	0.893406	3	0.239505	3.73022	0.268081	0.967637	NA	NA	NA
34710	7448574	16	1.19121	4	0.31934	3.73022	0.268081	0.867273	DNA binding	Chromatin remodeling complex WSTF-ISWI, small subunit	NA
4842	7451368	16	1.19121	4	0.31934	3.73022	0.268081	0.867273	NA	O-acetyltransferase	NA
10772	7442169	16	1.19121	4	0.31934	3.73022	0.268081	0.867273	NA	Ca2+-modulated nonselective cation channel polycystin	NA
6576	7446556	20	1.48901	5	0.399175	3.73022	0.268081	0.745212	NA	NA	NA
35711	7446233	4	0.297802	1	0.079835	3.73022	0.268081	1	hydrolase activity, hydrolyzing O-glycosyl compounds	NA	NA
11011	7450888	4	0.297802	1	0.079835	3.73022	0.268081	1	DNA binding	Nucleolar GTPase/ATPase p130	DNA (cytosine-5-)-methyltransferase.
263934	7443187	4	0.297802	1	0.079835	3.73022	0.268081	1	DNA binding	Chromatin remodeling protein HARP/SMARCAL1, DEAD-box superfamily	Adenosinetriphosphatase.
5711	7444872	4	0.297802	1	0.079835	3.73022	0.268081	1	NA	NA	NA
15226	7445097	4	0.297802	1	0.079835	3.73022	0.268081	1	diphosphomevalonate decarboxylase activity	Mevalonate pyrophosphate decarboxylase	Diphosphomevalonate decarboxylase.
32525	7445356	4	0.297802	1	0.079835	3.73022	0.268081	1	ubiquitin conjugating enzyme activity	Ubiquitin-protein ligase	Ubiquitin--protein ligase.
267946	7445661	8	0.595604	2	0.15967	3.73022	0.268081	1	S-adenosylmethionine-dependent methyltransferase activity	Spermidine synthase	NA
24801	7451208	8	0.595604	2	0.15967	3.73022	0.268081	1	NA	NA	NA
16613	7449057	4	0.297802	1	0.079835	3.73022	0.268081	1	protein kinase activity	eIF-2alpha kinase GCN2	NA
263344	7452413	8	0.595604	2	0.15967	3.73022	0.268081	1	citrate (pro-3S)-lyase activity	NA	Citrate lyase.
264541	7450881	4	0.297802	1	0.079835	3.73022	0.268081	1	catalytic activity	Predicted hydrolase/acyltransferase (alpha/beta hydrolase superfamily)	NA
22951	7442326	4	0.297802	1	0.079835	3.73022	0.268081	1	electron transport	Glucose dehydrogenase/choline dehydrogenase/mandelonitrile lyase (GMC oxidoreductase family)	Choline dehydrogenase.
4713	7451927	4	0.297802	1	0.079835	3.73022	0.268081	1	calcium ion binding	NA	NA
264851	7448219	8	0.595604	2	0.15967	3.73022	0.268081	1	NA	Sensory transduction histidine kinase	NA
19301	7448186	4	0.297802	1	0.079835	3.73022	0.268081	1	proteolysis and peptidolysis	Mitochondrial inner membrane protease, subunit IMP1	Acting on peptide bonds (peptide hydrolases).
2065	7452150	8	0.595604	2	0.15967	3.73022	0.268081	1	NA	NA	NA
6616	7446380	4	0.297802	1	0.079835	3.73022	0.268081	1	NA	Nuclear pore complex, Nup98 component (sc Nup145/Nup100/Nup116)	NA
5351	7446470	8	0.595604	2	0.15967	3.73022	0.268081	1	NA	Myosin class II heavy chain	NA
7648	7449820	8	0.595604	2	0.15967	3.73022	0.268081	1	NA	Microtubule-binding protein MIP-T3	NA
263581	7450975	4	0.297802	1	0.079835	3.73022	0.268081	1	phosphate transport	NA	NA
8986	7445778	4	0.297802	1	0.079835	3.73022	0.268081	1	NA	NA	NA
36139	7448075	4	0.297802	1	0.079835	3.73022	0.268081	1	NA	Nuclear pore complex component (sc Seh1)	NA
3118	7442455	4	0.297802	1	0.079835	3.73022	0.268081	1	NA	NA	NA
4771	7443770	4	0.297802	1	0.079835	3.73022	0.268081	1	NA	NA	NA
11588	7447759	4	0.297802	1	0.079835	3.73022	0.268081	1	NA	Transcription regulator XNP/ATRX, DEAD-box superfamily	NA
36249	7451004	4	0.297802	1	0.079835	3.73022	0.268081	1	S-adenosylmethionine-dependent methyltransferase activity	Predicted RNA methylase	NA
264868	7449430	4	0.297802	1	0.079835	3.73022	0.268081	1	ATP binding	DEAD-box like helicase	NA
10992	7444815	4	0.297802	1	0.079835	3.73022	0.268081	1	NA	Myosin class II heavy chain	NA
262809	7443586	4	0.297802	1	0.079835	3.73022	0.268081	1	peroxidase activity	NA	L-ascorbate peroxidase.
269666	7453010	4	0.297802	1	0.079835	3.73022	0.268081	1	NA	26S proteasome regulatory complex, subunit RPN11	NA
2513	7450384	4	0.297802	1	0.079835	3.73022	0.268081	1	NA	Heterochromatin-associated protein HP1 and related CHROMO domain proteins	NA
28334	7453188	5599	416.848	1407	112.328	3.711	0.269469	2.29336e-07	glyceraldehyde-3-phosphate dehydrogenase (phosphorylating) activity	Glyceraldehyde 3-phosphate dehydrogenase	Glyceraldehyde 3-phosphate dehydrogenase (phosphorylating).
27187	7452450	6848	509.837	1726	137.795	3.69996	0.270273	2.30555e-07	carbohydrate metabolism	Transaldolase	Transaldolase.
30380	7444271	4997	372.029	1284	102.508	3.62926	0.275538	4.00954e-07	triose-phosphate isomerase activity	Triosephosphate isomerase	Triosephosphate isomerase.
6605	7446375	35	2.60577	9	0.718515	3.6266	0.27574	0.367442	NA	NA	NA
11876	7448214	31	2.30797	8	0.63868	3.61365	0.276729	0.455944	ubiquitin ligase complex	FOG: Predicted E3 ubiquitin ligase	NA
9396	7453009	31	2.30797	8	0.63868	3.61365	0.276729	0.455944	NA	Chromatin-associated protein Dek and related proteins, contains SAP DNA binding domain	NA
24594	7442713	54	4.02033	14	1.11769	3.597	0.27801	0.1322	NA	PHD finger protein AF10	NA
9635	7450529	235	17.4959	61	4.86994	3.59263	0.278348	0.000295702	NA	NA	NA
261414	7450399	23	1.71236	6	0.47901	3.57479	0.279737	0.672482	transporter activity	Inorganic phosphate transporter	NA
7186	7450704	3416	254.323	892	71.2128	3.57131	0.28001	8.71147e-07	NA	NA	NA
262251	7451914	19	1.41456	5	0.399175	3.54371	0.28219	0.793235	intracellular signaling cascade	NA	NA
11442	7447816	19	1.41456	5	0.399175	3.54371	0.28219	0.793235	NA	Predicted alkaloid synthase/Surface mucin Hemomucin	NA
935	7442871	34	2.53132	9	0.718515	3.52298	0.28385	0.4046	NA	Leucine-rich repeat protein	NA
261078	7449025	15	1.11676	4	0.31934	3.49708	0.285953	0.909598	NA	Predicted K+/H+-antiporter	NA
8274	7451041	15	1.11676	4	0.31934	3.49708	0.285953	0.909598	3',5'-cyclic-nucleotide phosphodiesterase activity	Cyclic GMP phosphodiesterase	3',5'-cyclic-nucleotide phosphodiesterase.
5776	7442286	15	1.11676	4	0.31934	3.49708	0.285953	0.909598	NA	U5 snRNP spliceosome subunit	NA
34094	7449704	37	2.75467	10	0.79835	3.45045	0.289817	0.359979	NA	NA	NA
5677	7444855	11	0.818955	3	0.239505	3.41937	0.292452	0.992375	phosphopantetheine binding	FOG: PPR repeat	NA
3539	7441890	11	0.818955	3	0.239505	3.41937	0.292452	0.992375	exo-alpha-sialidase activity	Chitinase	Exo-alpha-sialidase.
5232	7446413	11	0.818955	3	0.239505	3.41937	0.292452	0.992375	proteolysis and peptidolysis	NA	NA
24577	7448047	11	0.818955	3	0.239505	3.41937	0.292452	0.992375	NA	Chitinase	NA
12141	7451996	11	0.818955	3	0.239505	3.41937	0.292452	0.992375	homoserine O-acetyltransferase activity	Fibrillarin and related nucleolar RNA-binding proteins	Homoserine O-acetyltransferase.
7683	7449837	11	0.818955	3	0.239505	3.41937	0.292452	0.992375	NA	NA	NA
263332	7452401	11	0.818955	3	0.239505	3.41937	0.292452	0.992375	NA	Ankyrin	NA
21910	7445318	11	0.818955	3	0.239505	3.41937	0.292452	0.992375	NA	Uncharacterized conserved protein	NA
262104	7447489	11	0.818955	3	0.239505	3.41937	0.292452	0.992375	phospholipase C activity	Phospholipase C	NA
8407	7451106	58	4.31813	16	1.27736	3.38051	0.295813	0.132752	NA	NA	NA
262645	7442284	18	1.34011	5	0.399175	3.3572	0.297868	0.841433	metabolism	Chitinase	Chitinase.
35855	7445583	18	1.34011	5	0.399175	3.3572	0.297868	0.841433	NA	NA	NA
37995	7442109	25	1.86126	7	0.558845	3.33055	0.300251	0.652599	NA	Uncharacterized conserved protein	NA
17302	7452735	556	41.3945	158	12.6139	3.28165	0.304725	7.64458e-05	inositol or phosphatidylinositol phosphatase activity	Inositol monophosphatase	Myo-inositol-1(or 4)-monophosphatase.
22483	7451399	3221	239.805	917	73.2087	3.27564	0.305284	7.85963e-06	NA	NA	NA
3108	7452800	179	13.3266	51	4.07159	3.27308	0.305522	0.00293337	calcium ion binding	NA	NA
7600	7452811	28	2.08461	8	0.63868	3.26394	0.306378	0.587705	NA	Myosin class II heavy chain	NA
10955	7443010	14	1.04231	4	0.31934	3.26394	0.306378	0.952851	cofactor binding	NA	NA
5380	7449639	14	1.04231	4	0.31934	3.26394	0.306378	0.952851	NA	NA	NA
174	7445641	14	1.04231	4	0.31934	3.26394	0.306378	0.952851	3-oxoacid CoA-transferase activity	Succinyl-CoA:alpha-ketoacid-CoA transferase	3-oxoacid CoA-transferase.
33625	7451898	14	1.04231	4	0.31934	3.26394	0.306378	0.952851	DNA binding	DNA topoisomerase III alpha	DNA topoisomerase.
3945	7443799	35	2.60577	10	0.79835	3.26394	0.306378	0.43369	NA	NA	NA
21882	7451316	7	0.521153	2	0.15967	3.26394	0.306378	1	NA	DNA mismatch repair protein - MLH3 family	NA
21991	7443786	7	0.521153	2	0.15967	3.26394	0.306378	1	NA	NA	NA
6612	7446572	7	0.521153	2	0.15967	3.26394	0.306378	1	NA	Uncharacterized conserved protein	NA
261754	7444749	7	0.521153	2	0.15967	3.26394	0.306378	1	NA	Sulfate/bicarbonate/oxalate exchanger SAT-1 and related transporters (SLC26 family)	NA
269439	7448092	7	0.521153	2	0.15967	3.26394	0.306378	1	NA	NA	NA
263128	7449012	7	0.521153	2	0.15967	3.26394	0.306378	1	NA	Cyclic nucleotide phosphodiesterase	NA
269503	7445882	7	0.521153	2	0.15967	3.26394	0.306378	1	transcription factor activity	NA	NA
8217	7446985	7	0.521153	2	0.15967	3.26394	0.306378	1	exo-alpha-sialidase activity	Fibrillins and related proteins containing Ca2+-binding EGF-like domains	Exo-alpha-sialidase.
35059	7445941	7	0.521153	2	0.15967	3.26394	0.306378	1	motor activity	Myosin VII, myosin IXB and related myosins	NA
35929	7452376	7	0.521153	2	0.15967	3.26394	0.306378	1	protein kinase activity	Serine/threonine protein kinase	NA
21090	7445477	7	0.521153	2	0.15967	3.26394	0.306378	1	NA	NA	NA
33109	7452808	7	0.521153	2	0.15967	3.26394	0.306378	1	zinc ion binding	Predicted quinone oxidoreductase	NADPH:quinone reductase.
261219	7452188	7	0.521153	2	0.15967	3.26394	0.306378	1	NA	Mitotic checkpoint serine/threonine protein kinase	NA
263287	7450596	1622	120.759	464	37.0434	3.25992	0.306756	1.60628e-05	NA	NA	NA
3554	7451704	321	23.8986	92	7.34482	3.2538	0.307333	0.000416629	NA	NA	NA
261657	7441735	562	41.8412	162	12.9333	3.23516	0.309104	0.000101154	metabolism	Cation transport ATPase	NA
5500	7450100	93	6.9239	27	2.15555	3.21213	0.31132	0.0373019	phosphorylation	NA	Pyruvate,phosphate dikinase.
269968	7444830	3383	251.866	983	78.4778	3.20939	0.311586	1.40582e-05	NA	NA	NA
11993	7448269	55	4.09478	16	1.27736	3.20566	0.311949	0.181066	amino acid metabolism	Cystathionine beta-lyases/cystathionine gamma-synthases	NA
32414	7442223	17	1.26566	5	0.399175	3.17068	0.315389	0.885812	GTP binding	Mitochondrial GTPase	NA
43150	7452003	3113	231.764	923	73.6877	3.14522	0.317942	2.10593e-05	NA	Protein involved in vacuolar polyphosphate accumulation, contains SPX domain	NA
5675	7444854	121	9.00851	36	2.87406	3.13442	0.319038	0.0181843	NA	NA	NA
23350	7446172	10	0.744505	3	0.239505	3.10851	0.321697	1	NA	NA	NA
32029	7446496	10	0.744505	3	0.239505	3.10851	0.321697	1	S-adenosylmethionine-dependent methyltransferase activity	SAM-dependent methyltransferases	Delta(24)-sterol C-methyltransferase.
3564	7441901	10	0.744505	3	0.239505	3.10851	0.321697	1	NA	NA	NA
38757	7443661	20	1.48901	6	0.47901	3.10851	0.321697	0.816639	GTP binding	Mitochondrial GTPase	NA
5769	7444906	20	1.48901	6	0.47901	3.10851	0.321697	0.816639	extracellular region	Ca2+-modulated nonselective cation channel polycystin	NA
23540	7447121	412	30.6736	124	9.89954	3.09849	0.322738	0.000460667	NA	NA	NA
4608	7446140	156	11.6143	47	3.75225	3.09529	0.323072	0.0085728	NA	NA	NA
9855	7452688	53	3.94588	16	1.27736	3.08909	0.32372	0.223317	S-adenosylmethionine-dependent methyltransferase activity	Predicted methyltransferase	NA
270359	7449611	261	19.4316	79	6.30697	3.08097	0.324573	0.00166297	NA	NA	NA
25800	7448248	23	1.71236	7	0.558845	3.06411	0.326359	0.748582	NA	NA	NA
32319	7450398	23	1.71236	7	0.558845	3.06411	0.326359	0.748582	5'-nucleotidase activity	IMP-GMP specific 5'-nucleotidase	5'-nucleotidase.
3422	7444771	82	6.10494	25	1.99588	3.05878	0.326928	0.0750052	NA	NA	NA
28199	7449656	39	2.90357	12	0.95802	3.0308	0.329946	0.413903	protein folding	Cyclophilin-type peptidyl-prolyl cis-trans isomerase	Peptidylprolyl isomerase.
35830	7452880	13	0.967856	4	0.31934	3.0308	0.329946	0.976417	phospholipid biosynthesis	Phosphatidylinositol synthase	CDP-diacylglycerol--inositol 3-phosphatidyltransferase.
9617	7447890	13	0.967856	4	0.31934	3.0308	0.329946	0.976417	integral to membrane	SNARE protein YKT6, synaptobrevin/VAMP syperfamily	NA
15292	7444134	13	0.967856	4	0.31934	3.0308	0.329946	0.976417	pantothenate kinase activity	Pantothenate kinase PanK and related proteins	Pantothenate kinase.
20671	7449158	7494	557.932	2315	184.818	3.01882	0.331256	4.77384e-05	NA	NA	NA
21255	7450243	689	51.2964	214	17.0847	3.00248	0.333058	0.000296121	NA	Uncharacterized conserved protein	NA
31566	7442877	16	1.19121	5	0.399175	2.98417	0.335101	0.927263	NA	Predicted membrane protein	NA
5119	7449679	35	2.60577	11	0.878185	2.96722	0.337016	0.500448	NA	Uncharacterized membrane protein, predicted efflux pump	NA
268621	7442076	2341	174.289	736	58.7586	2.96618	0.337134	0.00010656	carbohydrate metabolism	Phosphoglucomutase	Phosphoglucomutase.
12087	7448904	89	6.62609	28	2.23538	2.96419	0.33736	0.0705127	NA	NA	NA
25295	7442144	14383	1070.82	4533	361.892	2.95895	0.337957	6.43998e-05	proteolysis and peptidolysis	Glutathione S-transferase	NA
1747	7449040	706	52.562	224	17.883	2.93921	0.340227	0.000420786	NA	Uncharacterized conserved protein	NA
3222	7441766	425	31.6415	135	10.7777	2.93582	0.34062	0.00107046	NA	NA	NA
11869	7443922	22	1.63791	7	0.558845	2.93089	0.341194	0.793582	metabolism	Nucleolar GTPase/ATPase p130	Ubiquitin--protein ligase.
12066	7442664	50	3.72252	16	1.27736	2.91423	0.343144	0.294705	transcription factor activity	Heat shock transcription factor	NA
10045	7441949	25	1.86126	8	0.63868	2.91423	0.343144	0.72653	NA	NA	NA
37974	7453092	62	4.61593	20	1.5967	2.89092	0.345911	0.195486	sugar porter activity	Predicted transporter (major facilitator superfamily)	L-arabinose isomerase.
270031	7443363	65	4.83928	21	1.67654	2.88648	0.346443	0.177425	catalytic activity	NA	NA
24091	7446987	65	4.83928	21	1.67654	2.88648	0.346443	0.177425	NA	Projectin/twitchin and related proteins	NA
3313	7444717	547	40.7244	178	14.2106	2.86577	0.348946	0.00100268	peroxidase activity	NA	L-ascorbate peroxidase.
22835	7445193	3100	230.797	1009	80.5535	2.86513	0.349024	0.00018993	NA	NA	NA
262610	7444853	172	12.8055	56	4.47076	2.86427	0.349129	0.0142862	ADP-ribose diphosphatase activity	Nucleoside diphosphate-sugar hydrolase of the MutT (NUDIX) family	ADP-ribose pyrophosphatase.
261272	7446475	153	11.3909	50	3.99175	2.85362	0.350433	0.0196775	NA	NA	NA
261726	7444703	1702	126.715	560	44.7076	2.8343	0.352821	0.000347409	hydrolase activity	NA	NA
21559	7452940	453	33.7261	150	11.9753	2.81631	0.355074	0.00175541	NA	Nuclear receptor coregulator SMRT/SMRTER, contains Myb-like domains	NA
1711	7445542	9	0.670054	3	0.239505	2.79766	0.357441	1	protein tyrosine phosphatase activity	Phosphatidylinositol transfer protein SEC14 and related proteins	Protein-tyrosine-phosphatase.
5133	7449685	9	0.670054	3	0.239505	2.79766	0.357441	1	NA	NA	NA
5387	7450046	9	0.670054	3	0.239505	2.79766	0.357441	1	NA	NA	NA
9277	7448043	9	0.670054	3	0.239505	2.79766	0.357441	1	glucan 1,4-alpha-glucosidase activity	von Willebrand factor and related coagulation proteins	Glucan 1,4-alpha-glucosidase.
10566	7453115	9	0.670054	3	0.239505	2.79766	0.357441	1	integral to membrane	K+-dependent Na+:Ca2+ antiporter	NA
8287	7447017	9	0.670054	3	0.239505	2.79766	0.357441	1	NA	NA	NA
16772	7446423	9	0.670054	3	0.239505	2.79766	0.357441	1	binding	Mitochondrial phosphate carrier protein	NA
263067	7446617	9	0.670054	3	0.239505	2.79766	0.357441	1	protein kinase activity	Ste20-like serine/threonine protein kinase	Phosphotransferases with an alcohol group as acceptor.
7870	7444990	9	0.670054	3	0.239505	2.79766	0.357441	1	NA	NA	NA
15246	7446533	9	0.670054	3	0.239505	2.79766	0.357441	1	NA	Sodium/hydrogen exchanger protein	NA
17935	7443598	21	1.56346	7	0.558845	2.79766	0.357441	0.838937	nucleic acid binding	Exosome 3'-5' exoribonuclease complex, subunit PM/SCL-100 (Rrp6)	NA
7540	7450155	24	1.78681	8	0.63868	2.79766	0.357441	0.772092	catalytic activity	Predicted phosphoglycerate mutase	NA
263051	7450636	12	0.893406	4	0.31934	2.79766	0.357441	1	ATP binding	Cation transport ATPase	Copper-exporting ATPase.
34100	7448457	12	0.893406	4	0.31934	2.79766	0.357441	1	NA	NA	NA
19374	7445210	12	0.893406	4	0.31934	2.79766	0.357441	1	nucleic acid binding	Nuclear cap-binding protein complex, subunit CBP20 (RRM superfamily)	NA
6248	7445980	12	0.893406	4	0.31934	2.79766	0.357441	1	electron transporter activity	NA	NA
7237	7447170	12	0.893406	4	0.31934	2.79766	0.357441	1	NA	C-type lectin	NA
24562	7448026	12	0.893406	4	0.31934	2.79766	0.357441	1	myosin ATPase activity	Myosin class II heavy chain	Myosin ATPase.
9168	7447585	15	1.11676	5	0.399175	2.79766	0.357441	0.961722	acid phosphatase activity	Lysosomal & prostatic acid phosphatases	Acid phosphatase.
10078	7444299	15	1.11676	5	0.399175	2.79766	0.357441	0.961722	calcium ion binding	Putative protein methyltransferase involved in meiosis and transcriptional silencing (Dot1)	NA
38948	7445112	15	1.11676	5	0.399175	2.79766	0.357441	0.961722	NA	Uncharacterized conserved protein	NA
11975	7448262	45	3.35027	15	1.19753	2.79766	0.357441	0.388032	NA	NA	NA
22899	7444897	60	4.46703	20	1.5967	2.79766	0.357441	0.236086	NA	von Willebrand factor and related coagulation proteins	NA
37197	7448045	30	2.23351	10	0.79835	2.79766	0.357441	0.642926	RNA binding	Translational repressor Pumilio/PUF3 and related RNA-binding proteins (Puf superfamily)	NA
14979	7452128	18	1.34011	6	0.47901	2.79766	0.357441	0.90343	metabolism	Phosphoserine aminotransferase	Phosphoserine aminotransferase.
4086	7446730	3	0.223351	1	0.079835	2.79766	0.357441	1	NA	NA	NA
6645	7450638	3	0.223351	1	0.079835	2.79766	0.357441	1	NA	NA	NA
31629	7446817	3	0.223351	1	0.079835	2.79766	0.357441	1	structural molecule activity	Teneurin-1 and related extracellular matrix proteins, contain EGF-like repeats	NA
879	7445008	3	0.223351	1	0.079835	2.79766	0.357441	1	NA	NA	NA
15977	7444581	3	0.223351	1	0.079835	2.79766	0.357441	1	diacylglycerol kinase activity	Diacylglycerol kinase	Diacylglycerol kinase.
11534	7448538	3	0.223351	1	0.079835	2.79766	0.357441	1	DNA binding	NA	NA
3146	7441725	3	0.223351	1	0.079835	2.79766	0.357441	1	NA	NA	NA
33377	7452651	3	0.223351	1	0.079835	2.79766	0.357441	1	regulation of cell cycle	Cyclin B and related kinase-activating proteins	NA
4431	7447941	3	0.223351	1	0.079835	2.79766	0.357441	1	NA	NA	NA
2951	7450454	3	0.223351	1	0.079835	2.79766	0.357441	1	NA	DNA-binding protein YL1 and related proteins	NA
8011	7443540	3	0.223351	1	0.079835	2.79766	0.357441	1	NA	beta-1,6-N-acetylglucosaminyltransferase, contains WSC domain	NA
4423	7447937	3	0.223351	1	0.079835	2.79766	0.357441	1	NA	NA	NA
24978	7444308	3	0.223351	1	0.079835	2.79766	0.357441	1	NA	Collagens (type IV and type XIII), and related proteins	NA
23654	7452393	3	0.223351	1	0.079835	2.79766	0.357441	1	oxidoreductase activity	U2 snRNP splicing factor, small subunit, and related proteins	NA
264262	7441848	3	0.223351	1	0.079835	2.79766	0.357441	1	NA	NA	NA
11488	7443344	3	0.223351	1	0.079835	2.79766	0.357441	1	NA	NA	NA
261472	7443082	3	0.223351	1	0.079835	2.79766	0.357441	1	NA	WD40 repeat-containing protein	NA
37599	7441952	3	0.223351	1	0.079835	2.79766	0.357441	1	NA	NA	NA
17593	7446379	3	0.223351	1	0.079835	2.79766	0.357441	1	subtilase activity	Subtilisin-related protease/Vacuolar protease B	NA
262751	7448425	3	0.223351	1	0.079835	2.79766	0.357441	1	NA	Endoplasmic reticulum membrane-associated oxidoreductin involved in disulfide bond formation	NA
6252	7442372	3	0.223351	1	0.079835	2.79766	0.357441	1	NA	NA	NA
35723	7444125	3	0.223351	1	0.079835	2.79766	0.357441	1	DNA binding	SNF2 family DNA-dependent ATPase domain-containing protein	NA
3635	7451282	3	0.223351	1	0.079835	2.79766	0.357441	1	NA	NA	NA
11639	7447786	3	0.223351	1	0.079835	2.79766	0.357441	1	NA	NA	NA
4571	7448814	3	0.223351	1	0.079835	2.79766	0.357441	1	oxidoreductase activity, acting on paired donors, with incorporation or reduction of molecular oxygen, 2-oxoglutarate as one donor, and incorporation of one atom each of oxygen into both donors	Prolyl 4-hydroxylase alpha subunit	Procollagen-proline,2-oxoglutarate-4-dioxygenase.
261312	7450208	3	0.223351	1	0.079835	2.79766	0.357441	1	transporter activity	Sugar transporter/spinster transmembrane protein	NA
264043	7446968	3	0.223351	1	0.079835	2.79766	0.357441	1	NA	NA	NA
3056	7452141	3	0.223351	1	0.079835	2.79766	0.357441	1	NA	NA	NA
262721	7448407	3	0.223351	1	0.079835	2.79766	0.357441	1	signal transducer activity	NA	NA
7904	7443489	3	0.223351	1	0.079835	2.79766	0.357441	1	NA	NA	NA
34925	7442330	3	0.223351	1	0.079835	2.79766	0.357441	1	NA	Helicase-like transcription factor HLTF/DNA helicase RAD5, DEAD-box superfamily	NA
6122	7448613	6	0.446703	2	0.15967	2.79766	0.357441	1	N-acetyltransferase activity	NA	NA
6010	7448559	6	0.446703	2	0.15967	2.79766	0.357441	1	NA	NA	NA
6542	7446343	6	0.446703	2	0.15967	2.79766	0.357441	1	NA	NA	NA
260784	7445280	6	0.446703	2	0.15967	2.79766	0.357441	1	NA	Phosphatidylinositol transfer protein SEC14 and related proteins	NA
20431	7453117	6	0.446703	2	0.15967	2.79766	0.357441	1	DNA binding	NA	NA
8002	7443536	676	50.3285	226	18.0427	2.78941	0.358499	0.00115537	NA	N-acetylglucosaminyl phosphatidylinositol de-N-acetylase	NA
2837	7452338	168	12.5077	57	4.5506	2.74858	0.363824	0.0223776	NA	Chitinase	NA
1822	7449078	29	2.15906	10	0.79835	2.70441	0.369767	0.686405	NA	ER-Golgi vesicle-tethering protein p115	NA
7172	7450696	222	16.528	77	6.1473	2.68866	0.371932	0.0148192	NA	NA	NA
262099	7452616	256	19.0593	89	7.10532	2.6824	0.3728	0.011395	alanine metabolism	NA	Alanine racemase.
2133	7442209	276	20.5483	96	7.66416	2.68109	0.372982	0.00965535	carbohydrate metabolism	NA	NA
9130	7447568	23	1.71236	8	0.63868	2.68109	0.372982	0.815669	oxidoreductase activity	NA	NA
262378	7448451	23	1.71236	8	0.63868	2.68109	0.372982	0.815669	NA	Fibrillins and related proteins containing Ca2+-binding EGF-like domains	NA
5660	7448200	287	21.3673	100	7.9835	2.67643	0.373632	0.00900346	tRNA ligase activity	NA	NA
270288	7442386	14824	1103.65	5166	412.428	2.67599	0.373693	0.000586459	NA	NA	NA
9242	7443197	289	21.5162	101	8.06334	2.6684	0.374757	0.00928281	NA	NA	NA
20854	7449131	2052	152.772	718	57.3215	2.66518	0.375209	0.00106868	NA	NA	NA
12662	7447770	485	36.1085	170	13.572	2.66052	0.375866	0.00377072	S-adenosylmethionine-dependent methyltransferase activity	SAM-dependent methyltransferases	Cyclopropane-fatty-acyl-phospholipid synthase.
8365	7445866	68	5.06263	24	1.91604	2.64224	0.378467	0.228035	NA	NA	NA
1768	7449049	17	1.26566	6	0.47901	2.64224	0.378467	0.944036	NA	NA	NA
6093	7448599	17	1.26566	6	0.47901	2.64224	0.378467	0.944036	NA	NA	NA
264081	7450531	17	1.26566	6	0.47901	2.64224	0.378467	0.944036	NA	mRNA cleavage and polyadenylation factor II complex, subunit CFT2 (CPSF subunit)	NA
10860	7442964	870	64.7719	308	24.5892	2.63416	0.379627	0.00234937	NA	NA	NA
2070	7452154	1048	78.0241	372	29.6986	2.6272	0.380634	0.00205146	ATP binding	von Willebrand factor and related coagulation proteins	NA
260744	7447633	28	2.08461	10	0.79835	2.61115	0.382973	0.730739	transaminase activity	Acetylornithine aminotransferase	Adenosylmethionine--8-amino-7-oxononanoate aminotransferase.
7245	7447174	42	3.12692	15	1.19753	2.61115	0.382973	0.491577	protein binding	NA	NA
1765	7447668	14	1.04231	5	0.399175	2.61115	0.382973	0.984733	NA	NA	NA
8497	7450730	14	1.04231	5	0.399175	2.61115	0.382973	0.984733	DNA binding	Transcriptional activator FOSB/c-Fos and related bZIP transcription factors	NA
263931	7443181	14	1.04231	5	0.399175	2.61115	0.382973	0.984733	ubiquitin thiolesterase activity	Ubiquitin C-terminal hydrolase UCHL1	Ubiquitinyl hydrolase 1.
7601	7445610	14	1.04231	5	0.399175	2.61115	0.382973	0.984733	ubiquitin thiolesterase activity	Ubiquitin-specific protease	Ubiquitin thiolesterase.
19626	7450408	14	1.04231	5	0.399175	2.61115	0.382973	0.984733	proteolysis and peptidolysis	Meprin A metalloprotease	NA
7233	7450572	1922	143.094	688	54.9265	2.60519	0.383849	0.00155714	NA	FOG: Low-complexity	NA
34507	7442274	39	2.90357	14	1.11769	2.59783	0.384937	0.540789	protein serine/threonine phosphatase activity	Serine/threonine protein phosphatase	Serine/threonine specific protein phosphatase.
25041	7450274	25	1.86126	9	0.718515	2.59043	0.386036	0.793944	peptidyl-prolyl cis-trans isomerase activity	Uncharacterized protein CLU1/cluA/TIF31 involved in mitochondrial morphology/distribution, also found associated with eIF-3	Peptidylprolyl isomerase.
10629	7453147	75	5.58379	27	2.15555	2.59043	0.386036	0.205098	NA	NA	NA
10899	7442981	86	6.40274	31	2.47489	2.58709	0.386535	0.1599	NA	NA	NA
23441	7449215	454	33.8005	165	13.1728	2.56594	0.389721	0.00741246	catalytic activity	NA	NA
4050	7452781	11	0.818955	4	0.31934	2.56452	0.389936	1	proteolysis and peptidolysis	von Willebrand factor and related coagulation proteins	Acid--D-amino-acid ligases (peptide synthases).
263205	7447077	11	0.818955	4	0.31934	2.56452	0.389936	1	membrane	Prohibitin	NA
269307	7447207	11	0.818955	4	0.31934	2.56452	0.389936	1	NA	RNA Helicase	NA
36775	7449384	11	0.818955	4	0.31934	2.56452	0.389936	1	protein folding	HSP90 co-chaperone CPR7/Cyclophilin	Peptidylprolyl isomerase.
10295	7450311	11	0.818955	4	0.31934	2.56452	0.389936	1	NA	Chitinase	NA
3553	7441897	231	17.1981	84	6.70614	2.56452	0.389936	0.0225509	NA	NA	NA
21281	7450346	571	42.5112	209	16.6855	2.54779	0.392497	0.00625414	structural constituent of ribosome	NA	NA
263048	7446583	1517	112.941	557	44.4681	2.53983	0.393727	0.00298245	NA	NA	NA
23850	7449872	701	52.1898	258	20.5974	2.5338	0.394664	0.00543186	NA	Nucleolar GTPase/ATPase p130	NA
3946	7443800	19	1.41456	7	0.558845	2.53122	0.395067	0.920192	aspartic-type endopeptidase activity	NA	NA
35094	7445962	19	1.41456	7	0.558845	2.53122	0.395067	0.920192	L-serine biosynthesis	Glyoxylate/hydroxypyruvate reductase (D-isomer-specific 2-hydroxy acid dehydrogenase superfamily)	NA
7017	7447059	57	4.24368	21	1.67654	2.53122	0.395067	0.350632	NA	von Willebrand factor and related coagulation proteins	NA
11777	7442829	141	10.4975	52	4.15142	2.52866	0.395467	0.0673149	NA	Putative N2,N2-dimethylguanosine tRNA methyltransferase	NA
34647	7442399	46	3.42472	17	1.3572	2.52338	0.396293	0.471011	NA	Aromatic amino acid aminotransferase and related proteins	NA
3344	7444734	27	2.01016	10	0.79835	2.5179	0.397157	0.77361	nucleic acid binding	Peroxisomal membrane protein MPV17 and related proteins	NA
10867	7444261	585	43.5535	217	17.3242	2.51403	0.397768	0.00733463	NA	Transcription initiation factor TFIID, subunit BDF1 and related bromodomain proteins	NA
23258	7442778	35	2.60577	13	1.03786	2.51072	0.398292	0.634813	NA	NA	NA
31636	7445048	1161	86.437	433	34.5686	2.50045	0.399928	0.0043172	aldose 1-epimerase activity	Uncharacterized enzymes related to aldose 1-epimerase	NA
31232	7451444	2381	177.267	890	71.0532	2.49484	0.400827	0.00332269	6-phosphofructokinase activity	Pyrophosphate-dependent phosphofructo-1-kinase	Diphosphate--fructose-6-phosphate 1-phosphotransferase.
9674	7451615	8	0.595604	3	0.239505	2.48681	0.402121	1	NA	Nucleolar GTPase/ATPase p130	NA
32491	7450473	8	0.595604	3	0.239505	2.48681	0.402121	1	electron transport	Cytochrome P450 CYP3/CYP5/CYP6/CYP9 subfamilies	NA
3034	7452955	8	0.595604	3	0.239505	2.48681	0.402121	1	NA	FKBP-type peptidyl-prolyl cis-trans isomerase	NA
2010	7445468	8	0.595604	3	0.239505	2.48681	0.402121	1	NA	Predicted transporter/transmembrane protein	NA
4466	7453383	8	0.595604	3	0.239505	2.48681	0.402121	1	NA	NA	NA
1849	7447652	8	0.595604	3	0.239505	2.48681	0.402121	1	protein kinase activity	FOG: Leucine rich repeat	NA
262059	7446768	8	0.595604	3	0.239505	2.48681	0.402121	1	metabolism	UDP-glucose pyrophosphorylase	UTP--glucose-1-phosphate uridylyltransferase.
11562	7448551	8	0.595604	3	0.239505	2.48681	0.402121	1	glucan 1,4-alpha-glucosidase activity	von Willebrand factor and related coagulation proteins	Glucan 1,4-alpha-glucosidase.
269325	7452406	8	0.595604	3	0.239505	2.48681	0.402121	1	transcription factor activity	Heat shock transcription factor	NA
261279	7446478	24	1.78681	9	0.718515	2.48681	0.402121	0.836766	diacylglycerol O-acyltransferase activity	Sterol O-acyltransferase/Diacylglycerol O-acyltransferase	Diacylglycerol O-acyltransferase.
5695	7445234	24	1.78681	9	0.718515	2.48681	0.402121	0.836766	NA	Rhomboid family proteins	NA
5845	7447229	16	1.19121	6	0.47901	2.48681	0.402121	0.970105	NA	NA	NA
1160	7453464	16	1.19121	6	0.47901	2.48681	0.402121	0.970105	protein folding	FKBP-type peptidyl-prolyl cis-trans isomerase	NA
18530	7442026	16	1.19121	6	0.47901	2.48681	0.402121	0.970105	RNA binding	Ribonuclease HI	Ribonuclease H.
4937	7446704	16	1.19121	6	0.47901	2.48681	0.402121	0.970105	NA	NA	NA
10058	7444289	16	1.19121	6	0.47901	2.48681	0.402121	0.970105	NA	NA	NA
264783	7442809	16	1.19121	6	0.47901	2.48681	0.402121	0.970105	mismatch repair	DNA mismatch repair protein - MLH2/PMS1/Pms2 family	NA
17657	7442112	16	1.19121	6	0.47901	2.48681	0.402121	0.970105	GTP binding	Predicted GTP-binding protein MMR1	NA
262120	7452650	16	1.19121	6	0.47901	2.48681	0.402121	0.970105	ATP binding	Transporter, ABC superfamily (Breast cancer resistance protein)	NA
23296	7444611	1123	83.6079	424	33.85	2.46995	0.404867	0.00566833	NA	NA	NA
25074	7443983	463	34.4706	175	13.9711	2.46727	0.405306	0.0127783	NA	NA	NA
10277	7450303	37	2.75467	14	1.11769	2.46461	0.405744	0.619105	NA	NA	NA
9012	7449397	177	13.1777	67	5.34895	2.46361	0.405908	0.0553596	NA	NA	NA
34592	7446336	2417	179.947	916	73.1289	2.46068	0.406392	0.00398215	electron transport	NADP/FAD dependent oxidoreductase	Ferredoxin--NADP(+) reductase.
35135	7445985	87	6.47719	33	2.63456	2.45855	0.406743	0.198074	protein kinase activity	NDR and related serine/threonine kinases	NA
7775	7444944	798	59.4115	303	24.19	2.45603	0.40716	0.00772831	oxidoreductase activity, acting on paired donors, with incorporation or reduction of molecular oxygen, 2-oxoglutarate as one donor, and incorporation of one atom each of oxygen into both donors	Lysyl hydroxylase	NA
22213	7447915	3824	284.699	1454	116.08	2.45261	0.40773	0.0038115	6-phosphofructokinase activity	Pyrophosphate-dependent phosphofructo-1-kinase	6-phosphofructokinase.
33389	7452647	21	1.56346	8	0.63868	2.44796	0.408504	0.898028	protein kinase activity	cGMP-dependent protein kinase	NA
5079	7449659	21	1.56346	8	0.63868	2.44796	0.408504	0.898028	NA	Uncharacterized conserved protein	NA
11927	7449434	21	1.56346	8	0.63868	2.44796	0.408504	0.898028	NA	NA	NA
261491	7452297	21	1.56346	8	0.63868	2.44796	0.408504	0.898028	hydrolase activity, hydrolyzing O-glycosyl compounds	Alpha-D-galactosidase (melibiase)	NA
22430	7451969	2484	184.935	950	75.8433	2.43838	0.410108	0.00487614	NA	NA	NA
23958	7449312	1973	146.891	757	60.4351	2.43055	0.411429	0.00565748	aldose 1-epimerase activity	Uncharacterized enzymes related to aldose 1-epimerase	NA
23596	7447169	2092	155.75	804	64.1873	2.4265	0.412117	0.00570667	NA	FKBP-type peptidyl-prolyl cis-trans isomerase	NA
5659	7445214	39	2.90357	15	1.19753	2.42464	0.412432	0.604146	NA	Uncharacterized conserved protein	NA
1052	7449747	26	1.93571	10	0.79835	2.42464	0.412432	0.814849	NA	NA	NA
264421	7453122	26	1.93571	10	0.79835	2.42464	0.412432	0.814849	ATP binding	Pleiotropic drug resistance proteins (PDR1-15), ABC superfamily	NA
3733	7451331	13	0.967856	5	0.399175	2.42464	0.412432	1	NA	NA	NA
3797	7445338	13	0.967856	5	0.399175	2.42464	0.412432	1	NA	ER-Golgi vesicle-tethering protein p115	NA
1432	7449114	13	0.967856	5	0.399175	2.42464	0.412432	1	NA	NA	NA
264237	7441835	13	0.967856	5	0.399175	2.42464	0.412432	1	NA	Spermidine synthase	NA
10935	7444782	161	11.9865	62	4.94977	2.42163	0.412944	0.0739866	potassium channel activity	K+-channel ERG and related proteins, contain PAS/PAC sensor domain	NA
269328	7443455	1222	90.9785	471	37.6023	2.41949	0.41331	0.00743535	ligase activity	3-Methylcrotonyl-CoA carboxylase, non-biotin containing subunit/Acetyl-CoA carboxylase carboxyl transferase, subunit beta	Methylcrotonyl-CoA carboxylase.
268147	7452145	267	19.8783	103	8.22301	2.4174	0.413668	0.0333883	amino acid-polyamine transporter activity	NA	NA
269393	7452379	12411	924.005	4799	383.128	2.41174	0.414639	0.00461112	UDPsulfoquinovose synthase activity	UDP-glucose 4-epimerase/UDP-sulfoquinovose synthase	NA
1010	7449128	67	4.98818	26	2.07571	2.40312	0.416126	0.326603	NA	Glycosyltransferase	NA
4066	7446722	85	6.32829	33	2.63456	2.40203	0.416314	0.230031	NA	NA	NA
20654	7445239	18	1.34011	7	0.558845	2.398	0.417015	0.956562	metalloendopeptidase activity	NA	NA
261047	7443157	18	1.34011	7	0.558845	2.398	0.417015	0.956562	binding	Mitochondrial carrier protein PET8	NA
263081	7448952	18	1.34011	7	0.558845	2.398	0.417015	0.956562	NA	FOG: Leucine rich repeat	NA
35342	7447191	18	1.34011	7	0.558845	2.398	0.417015	0.956562	cysteine-type endopeptidase activity	Dyneins, heavy chain	NA
268044	7445153	18	1.34011	7	0.558845	2.398	0.417015	0.956562	rRNA processing	NA	NA
7160	7447136	36	2.68022	14	1.11769	2.398	0.417015	0.658352	NA	NA	NA
30620	7443628	226	16.8258	88	7.02548	2.39497	0.417542	0.0475691	S-adenosylmethionine-dependent methyltransferase activity	NA	NA
32430	7450377	620	46.1593	242	19.3201	2.38919	0.418552	0.0145174	aspartic-type endopeptidase activity	NA	NA
10048	7441951	489	36.4063	191	15.2485	2.38753	0.418842	0.0178538	NA	Ca2+/calmodulin-dependent protein kinase, EF-Hand protein superfamily	NA
263963	7452963	28	2.08461	11	0.878185	2.37377	0.42127	0.794307	NA	Vesicle coat complex AP-3, delta subunit	NA
9330	7450566	28	2.08461	11	0.878185	2.37377	0.42127	0.794307	NA	Cytoskeleton-associated protein and related proteins	NA
8338	7447043	61	4.54148	24	1.91604	2.37024	0.421898	0.384993	NA	NA	NA
31928	7446502	187	13.9222	74	5.90779	2.35659	0.424342	0.0723738	ATP binding	Mitochondrial Fe/S cluster exporter, ABC superfamily	NA
23511	7447092	63	4.69038	25	1.99588	2.35004	0.425525	0.379136	NA	von Willebrand factor and related coagulation proteins	NA
33343	7446099	3527	262.587	1400	111.769	2.34937	0.425646	0.00824549	phosphogluconate dehydrogenase (decarboxylating) activity	6-phosphogluconate dehydrogenase	Phosphogluconate dehydrogenase (decarboxylating).
9643	7450802	20	1.48901	8	0.63868	2.33139	0.428929	0.936159	DNA binding	SNF2 family DNA-dependent ATPase	NA
11594	7443396	20	1.48901	8	0.63868	2.33139	0.428929	0.936159	NA	Uncharacterized conserved protein	NA
8371	7445869	20	1.48901	8	0.63868	2.33139	0.428929	0.936159	NA	Serine proteinase inhibitor (KU family) with thrombospondin repeats	NA
25205	7453110	70	5.21153	28	2.23538	2.33139	0.428929	0.340697	NA	NA	NA
262179	7447967	10	0.744505	4	0.31934	2.33139	0.428929	1	tubulin-tyrosine ligase activity	Tubulin-tyrosine ligase-related protein	NA
269416	7449289	10	0.744505	4	0.31934	2.33139	0.428929	1	NA	Dihydrolipoamide succinyltransferase (2-oxoglutarate dehydrogenase, E2 subunit)	NA
9459	7446921	10	0.744505	4	0.31934	2.33139	0.428929	1	electron transporter activity	Thioredoxin, nucleoredoxin and related proteins	NA
3954	7452122	10	0.744505	4	0.31934	2.33139	0.428929	1	NA	NA	NA
1685	7449152	10	0.744505	4	0.31934	2.33139	0.428929	1	NA	NA	NA
20615	7442898	10	0.744505	4	0.31934	2.33139	0.428929	1	DNA binding	Uncharacterized conserved protein	Myosin ATPase.
263504	7449293	10	0.744505	4	0.31934	2.33139	0.428929	1	signal transducer activity	NA	NA
9594	7447876	10	0.744505	4	0.31934	2.33139	0.428929	1	NA	FOG: Zn-finger	NA
261688	7441756	10	0.744505	4	0.31934	2.33139	0.428929	1	NA	Nucleolar GTPase/ATPase p130	NA
261059	7445516	10	0.744505	4	0.31934	2.33139	0.428929	1	NA	UDP-glucose:glycoprotein glucosyltransferase	NA
25848	7448882	10	0.744505	4	0.31934	2.33139	0.428929	1	NA	NA	NA
39812	7441775	10	0.744505	4	0.31934	2.33139	0.428929	1	NA	tRNA cytosine-5-methylases and related enzymes of the NOL1/NOP2/sun superfamily	NA
22887	7444885	25	1.86126	10	0.79835	2.33139	0.428929	0.856936	NA	NA	NA
2804	7452468	25	1.86126	10	0.79835	2.33139	0.428929	0.856936	NA	Nucleolar GTPase/ATPase p130	NA
3655	7449408	15	1.11676	6	0.47901	2.33139	0.428929	0.992619	triacylglycerol lipase activity	Predicted lipase/calmodulin-binding heat-shock protein	NA
22811	7445167	5	0.372252	2	0.15967	2.33139	0.428929	1	NA	von Willebrand factor and related coagulation proteins	NA
7999	7443535	5	0.372252	2	0.15967	2.33139	0.428929	1	NA	NA	NA
264332	7443957	5	0.372252	2	0.15967	2.33139	0.428929	1	NA	FOG: RCC1 domain	NA
264921	7442679	5	0.372252	2	0.15967	2.33139	0.428929	1	photosynthesis light harvesting	NA	NA
38095	7443019	5	0.372252	2	0.15967	2.33139	0.428929	1	ATP binding	Lipid exporter ABCA1 and related proteins, ABC superfamily	NA
4256	7452609	5	0.372252	2	0.15967	2.33139	0.428929	1	metabolism	NA	NA
3784	7449561	5	0.372252	2	0.15967	2.33139	0.428929	1	DNA binding	FOG: RCC1 domain	Acid--D-amino-acid ligases (peptide synthases).
17439	7449191	5	0.372252	2	0.15967	2.33139	0.428929	1	catalytic activity	Predicted alpha/beta hydrolase	NA
8064	7448071	5	0.372252	2	0.15967	2.33139	0.428929	1	NA	Uncharacterized conserved protein	NA
16605	7448687	5	0.372252	2	0.15967	2.33139	0.428929	1	L-fuculose-phosphate aldolase activity	Cytoskeletal protein Adducin	L-fuculose-phosphate aldolase.
4923	7451410	5	0.372252	2	0.15967	2.33139	0.428929	1	NA	NA	NA
24546	7448008	5	0.372252	2	0.15967	2.33139	0.428929	1	NA	NA	NA
37374	7451590	5	0.372252	2	0.15967	2.33139	0.428929	1	pseudouridylate synthase activity	Pseudouridine synthase	Pseudouridylate synthase.
262004	7446725	5	0.372252	2	0.15967	2.33139	0.428929	1	potassium channel activity	Cyclic nucleotide-gated cation channel CNGA1-3 and related proteins	NA
3149	7441726	5	0.372252	2	0.15967	2.33139	0.428929	1	NA	Glutathione S-transferase	NA
5694	7445233	5	0.372252	2	0.15967	2.33139	0.428929	1	NA	NA	NA
8438	7445902	5	0.372252	2	0.15967	2.33139	0.428929	1	carbohydrate metabolism	FOG: PPR repeat	NA
33088	7442476	5	0.372252	2	0.15967	2.33139	0.428929	1	GTP binding	Predicted GTP-binding protein (ODN superfamily)	NA
35668	7446181	5	0.372252	2	0.15967	2.33139	0.428929	1	metabolism	Reductases with broad range of substrate specificities	Acting on the CH-OH group of donors.
263944	7443202	5	0.372252	2	0.15967	2.33139	0.428929	1	actin binding	Rho GTPase effector BNI1 and related formins	NA
11569	7443385	152	11.3165	61	4.86994	2.32374	0.43034	0.110998	NA	NA	NA
3928	7452106	102	7.59395	41	3.27324	2.32001	0.431032	0.204697	metabolism	Predicted 3-ketosphinganine reductase	3-dehydrosphinganine reductase.
24918	7441821	659	49.0629	265	21.1563	2.31907	0.431207	0.0198335	NA	Low-density lipoprotein receptors containing Ca2+-binding EGF-like domains	NA
7406	7443454	164	12.2099	66	5.26911	2.31726	0.431545	0.102068	NA	Predicted hydrolases or acyltransferases (alpha/beta hydrolase superfamily)	NA
6935	7444101	815	60.6771	328	26.1859	2.31717	0.431561	0.0176204	transcription factor activity	Heat shock transcription factor	NA
21203	7448694	676	50.3285	273	21.795	2.30918	0.433054	0.0207798	NA	von Willebrand factor and related coagulation proteins	NA
3943	7452117	99	7.3706	40	3.1934	2.30807	0.433262	0.220062	NA	Predicted thioesterase	NA
5479	7453192	237	17.6448	96	7.66416	2.30224	0.434359	0.0638083	NA	NA	NA
5600	7448170	116	8.63626	47	3.75225	2.30162	0.434476	0.176509	electron transporter activity	Thioredoxin, nucleoredoxin and related proteins	NA
2386	7450239	74	5.50934	30	2.39505	2.3003	0.434726	0.332127	NA	NA	NA
260925	7445679	37	2.75467	15	1.19753	2.3003	0.434726	0.681016	zinc ion binding	Cytosine deaminase FCY1 and related enzymes	NA
8303	7447025	37	2.75467	15	1.19753	2.3003	0.434726	0.681016	structural constituent of ribosome	NA	NA
11576	7443388	32	2.38242	13	1.03786	2.29552	0.435631	0.756855	NA	Membrane coat complex Retromer, subunit VPS29/PEP11	NA
268845	7451756	27	2.01016	11	0.878185	2.289	0.436873	0.834865	NA	NA	NA
20800	7451452	27	2.01016	11	0.878185	2.289	0.436873	0.834865	exodeoxyribonuclease X activity	5'-3' exonuclease HKE1/RAT1	Exodeoxyribonucleases producing 5'-phosphomonoesters.
22308	7446117	125	9.30631	51	4.07159	2.28567	0.437508	0.165846	NA	Serine proteinase inhibitor (KU family) with thrombospondin repeats	NA
28350	7453216	1551	115.473	633	50.5356	2.28498	0.437641	0.0160568	catalytic activity	Phosphoglycerate mutase	Phosphoglycerate mutase.
2671	7446672	110	8.18955	45	3.59258	2.27958	0.438678	0.200851	NA	NA	NA
4946	7452269	61	4.54148	25	1.99588	2.27543	0.439477	0.433521	NA	NA	NA
12637	7451435	39	2.90357	16	1.27736	2.2731	0.439928	0.665078	motor activity	Myosin class V heavy chain	NA
9375	7452998	158	11.7632	65	5.18928	2.26682	0.441146	0.125714	transcription factor activity	Heat shock transcription factor	NA
29728	7445840	5570	414.689	2293	183.062	2.2653	0.441443	0.0142382	catalytic activity	UDP-glucose 4-epimerase/UDP-sulfoquinovose synthase	Acting on carbohydrates and derivatives.
262359	7452273	17	1.26566	7	0.558845	2.26477	0.441545	0.97807	NA	Pattern-formation protein/guanine nucleotide exchange factor	NA
35541	7449213	17	1.26566	7	0.558845	2.26477	0.441545	0.97807	metabolism	Cis-prenyltransferase	Di-trans-poly-cis-decaprenylcistransferase.
3840	7445358	17	1.26566	7	0.558845	2.26477	0.441545	0.97807	NA	FOG: PPR repeat	NA
4576	7448818	17	1.26566	7	0.558845	2.26477	0.441545	0.97807	multidrug transport	Uncharacterized membrane protein, predicted efflux pump	NA
411	7443730	228	16.9747	94	7.50449	2.26194	0.442098	0.0787879	catalytic activity	Succinyl-CoA synthetase, alpha subunit	Succinate--CoA ligase (GDP-forming).
40958	7448577	3016	224.543	1248	99.6341	2.25367	0.44372	0.0165313	triose-phosphate isomerase activity	Triosephosphate isomerase	Triosephosphate isomerase.
33480	7453390	398	29.6313	165	13.1728	2.24943	0.444556	0.0453704	NA	NA	NA
22867	7444859	1593	118.6	662	52.8508	2.24405	0.445623	0.0199471	NA	NA	NA
32066	7452484	1119	83.3101	466	37.2031	2.23933	0.446562	0.024265	binding	Mitochondrial carrier protein - Rim2p/Mrs12p	NA
2637	7443055	120	8.93406	50	3.99175	2.23813	0.446801	0.196622	1-phosphatidylinositol-4-phosphate kinase	Chitinase	1-phosphatidylinositol-4-phosphate kinase.
21689	7444715	36	2.68022	15	1.19753	2.23813	0.446801	0.719966	protein folding	Cyclophilin type peptidyl-prolyl cis-trans isomerase	NA
20962	7445541	12	0.893406	5	0.399175	2.23813	0.446801	1	NA	NA	NA
36454	7447006	12	0.893406	5	0.399175	2.23813	0.446801	1	structural constituent of ribosome	50S ribosomal protein L1	NA
9003	7445784	12	0.893406	5	0.399175	2.23813	0.446801	1	NA	Membrane protein involved in organellar division	NA
1291	7445271	12	0.893406	5	0.399175	2.23813	0.446801	1	NA	NA	NA
264816	7442847	12	0.893406	5	0.399175	2.23813	0.446801	1	nuclease activity	Mismatch repair ATPase MSH6 (MutS family)	NA
10628	7444199	48	3.57362	20	1.5967	2.23813	0.446801	0.573851	iron ion binding	NA	NA
10978	7443020	187	13.9222	78	6.22713	2.23574	0.447279	0.110809	NA	NA	NA
20821	7451477	146	10.8698	61	4.86994	2.23202	0.448026	0.155719	extracellular region	Defense-related protein containing SCP domain	NA
38909	7452000	43	3.20137	18	1.43703	2.22777	0.44888	0.635616	glutamate-tRNA ligase activity	Glutamyl-tRNA synthetase (mitochondrial)	Glutamate--tRNA ligase.
13996	7446649	150	11.1676	63	5.02961	2.22037	0.450376	0.155549	transport	Ammonia permease	NA
3202	7444016	50	3.72252	21	1.67654	2.22037	0.450376	0.561937	NA	NA	NA
263212	7447088	300	22.3351	126	10.0592	2.22037	0.450376	0.0674825	extracellular region	Defense-related protein containing SCP domain	NA
22902	7444899	1061	78.992	446	35.6064	2.21848	0.45076	0.0283579	NA	Chitinase	NA
5371	7449636	347	25.8343	146	11.6559	2.21641	0.451179	0.0604437	proteolysis and peptidolysis	4-hydroxyphenylpyruvate dioxygenase	NA
3275	7444057	297	22.1118	125	9.97938	2.21575	0.451315	0.0697317	NA	Uncharacterized conserved protein, contains TLDc domain	NA
18220	7450773	19	1.41456	8	0.63868	2.21482	0.451505	0.964576	GTP binding	GTPase Rab2, small G protein superfamily	NA
8003	7449327	19	1.41456	8	0.63868	2.21482	0.451505	0.964576	NA	N-acetylglucosaminyl phosphatidylinositol de-N-acetylase	NA
23861	7444939	32774	2440.04	13840	1104.92	2.20835	0.452827	0.0173774	NA	NA	NA
25016	7443932	639	47.5739	270	21.5555	2.20705	0.453094	0.0380465	metabolism	Aldehyde dehydrogenase	NA
21068	7446809	2015	150.018	853	68.0993	2.20293	0.453941	0.0251998	NA	Nucleolar GTPase/ATPase p130	NA
23867	7452361	4135	307.853	1751	139.791	2.20223	0.454084	0.0219238	S-adenosylmethionine-dependent methyltransferase activity	Protein-L-isoaspartate(D-aspartate) O-methyltransferase	NA
6468	7444571	118	8.78516	50	3.99175	2.20083	0.454374	0.221564	NA	Endoplasmic reticulum protein EP58, contains filamin rod domain and KDEL motif	NA
2635	7446656	33	2.45687	14	1.11769	2.19816	0.454925	0.776309	DNA-directed RNA polymerase activity	RNA polymerase II, large subunit	DNA-directed RNA polymerase.
20349	7453081	33	2.45687	14	1.11769	2.19816	0.454925	0.776309	NA	Glycosyl hydrolase, family 38 - alpha-mannosidase	NA
24480	7445818	1204	89.6384	511	40.7957	2.19725	0.455114	0.0304901	NA	Predicted glutathione S-transferase	NA
5090	7451731	245	18.2404	104	8.30284	2.19688	0.45519	0.0941506	NA	Helicase-like transcription factor HLTF/DNA helicase RAD5, DEAD-box superfamily	NA
4961	7448435	40	2.97802	17	1.3572	2.19425	0.455737	0.686634	catalytic activity	ER-Golgi vesicle-tethering protein p115	NA
12594	7444773	287	21.3673	122	9.73987	2.1938	0.455831	0.0802196	chitin binding	Proteins containing Ca2+-binding EGF-like domains	NA
20622	7449728	174	12.9544	74	5.90779	2.19276	0.456046	0.140728	electron transport	Predicted FAD-dependent oxidoreductase	Aminobutyraldehyde dehydrogenase.
10661	7444219	141	10.4975	60	4.7901	2.1915	0.456308	0.180536	exo-alpha-sialidase activity	Nucleolar GTPase/ATPase p130	Exo-alpha-sialidase.
9109	7447556	484	36.034	206	16.446	2.19105	0.456402	0.0519023	NA	NA	NA
4980	7448443	360	26.8022	154	12.2946	2.18	0.458716	0.067903	integral to membrane	Uncharacterized conserved protein, contains TBC domain	NA
1131	7442900	7	0.521153	3	0.239505	2.17596	0.459567	1	NA	NA	NA
31703	7450338	7	0.521153	3	0.239505	2.17596	0.459567	1	membrane-associated guanylate kinase	Guanylate kinase	Guanylate kinase.
21655	7441770	7	0.521153	3	0.239505	2.17596	0.459567	1	NA	Heterochromatin-associated protein HP1 and related CHROMO domain proteins	NA
7926	7449285	7	0.521153	3	0.239505	2.17596	0.459567	1	NA	NA	NA
2392	7446537	7	0.521153	3	0.239505	2.17596	0.459567	1	NA	NA	NA
260850	7445635	7	0.521153	3	0.239505	2.17596	0.459567	1	membrane	Putative zinc transporter	NA
27822	7452629	7	0.521153	3	0.239505	2.17596	0.459567	1	NA	Cyclin B and related kinase-activating proteins	NA
10585	7444179	7	0.521153	3	0.239505	2.17596	0.459567	1	NA	NA	NA
8384	7451094	7	0.521153	3	0.239505	2.17596	0.459567	1	glucan 1,4-alpha-glucosidase activity	Nucleolar GTPase/ATPase p130	Glucan 1,4-alpha-glucosidase.
4338	7452652	7	0.521153	3	0.239505	2.17596	0.459567	1	NA	NA	NA
37638	7449494	7	0.521153	3	0.239505	2.17596	0.459567	1	rhodopsin-like receptor activity	ATP-dependent RNA helicase A	Adenosinetriphosphatase.
10732	7453085	7	0.521153	3	0.239505	2.17596	0.459567	1	NA	Nucleolar GTPase/ATPase p130	NA
35005	7448417	7	0.521153	3	0.239505	2.17596	0.459567	1	DNA photolyase activity	Deoxyribodipyrimidine photolyase/cryptochrome	Deoxyribodipyrimidine photolyase.
11695	7443677	7	0.521153	3	0.239505	2.17596	0.459567	1	phosphopantetheine binding	NA	NA
263297	7450609	7	0.521153	3	0.239505	2.17596	0.459567	1	metabolism	Chitinase	Chitinase.
11629	7443637	7	0.521153	3	0.239505	2.17596	0.459567	1	NA	NA	NA
35410	7444123	7	0.521153	3	0.239505	2.17596	0.459567	1	NA	Peptide:N-glycanase	NA
261932	7452083	7	0.521153	3	0.239505	2.17596	0.459567	1	two-component response regulator activity	Sensory transduction histidine kinase	NA
261018	7443127	7	0.521153	3	0.239505	2.17596	0.459567	1	3',5'-cyclic-nucleotide phosphodiesterase activity	Cyclic GMP phosphodiesterase	NA
262815	7448607	7	0.521153	3	0.239505	2.17596	0.459567	1	DNA binding	Zuotin and related molecular chaperones (DnaJ superfamily), contains DNA-binding domains	NA
7956	7449304	7	0.521153	3	0.239505	2.17596	0.459567	1	NA	NA	NA
10164	7449491	28	2.08461	12	0.95802	2.17596	0.459567	0.854042	calcium ion binding	Chitinase	NA
12171	7452013	42	3.12692	18	1.43703	2.17596	0.459567	0.671249	NA	NA	NA
23188	7442413	14	1.04231	6	0.47901	2.17596	0.459567	1	transcription factor activity	Heat shock transcription factor	NA
2666	7443073	14	1.04231	6	0.47901	2.17596	0.459567	1	calcium ion binding	NA	NA
10918	7444775	14	1.04231	6	0.47901	2.17596	0.459567	1	NA	NA	NA
9011	7445788	14	1.04231	6	0.47901	2.17596	0.459567	1	NA	NA	NA
269843	7450270	14	1.04231	6	0.47901	2.17596	0.459567	1	DNA binding	Transcription factor NSD1 and related SET domain proteins	NA
28635	7442353	905	67.3777	388	30.976	2.17516	0.459736	0.0376343	NA	NA	NA
19435	7448157	534	39.7566	229	18.2822	2.1746	0.459854	0.0526269	calcium ion binding	Ca2+/calmodulin-dependent protein kinase, EF-Hand protein superfamily	NA
24965	7444290	121	9.00851	52	4.15142	2.16998	0.460833	0.231654	NA	NA	NA
22727	7450059	934	69.5368	402	32.0937	2.16668	0.461535	0.039079	nucleic acid binding	FOG: RCC1 domain	Acid--D-amino-acid ligases (peptide synthases).
5706	7449174	137	10.1997	59	4.71027	2.16542	0.461804	0.201376	metabolism	beta-1,6-N-acetylglucosaminyltransferase, contains WSC domain	NA
40771	7453217	1992	148.305	858	68.4984	2.16509	0.461874	0.0318693	phosphopyruvate hydratase complex	Enolase	Phosphopyruvate hydratase.
23420	7449190	1773	132.001	764	60.9939	2.16416	0.462073	0.0328198	NA	Halotolerance protein HAL3 (contains flavoprotein domain)	NA
268858	7449715	30390	2262.55	13103	1046.08	2.16289	0.462345	0.0234961	exo-alpha-sialidase activity	Chitinase	Exo-alpha-sialidase.
1986	7451492	37	2.75467	16	1.27736	2.15653	0.463707	0.741256	multidrug transport	Uncharacterized membrane protein, predicted efflux pump	NA
24760	7450819	573	42.6601	248	19.7991	2.15465	0.464112	0.0556474	NA	FOG: RRM domain	NA
41636	7449870	60	4.46703	26	2.07571	2.15205	0.464674	0.509815	DNA repair	Predicted DNA damage inducible protein	DNA-directed DNA polymerase.
8309	7451058	76	5.65824	33	2.63456	2.1477	0.465614	0.406473	protein kinase activity	NA	NA
6944	7449235	23	1.71236	10	0.79835	2.14488	0.466228	0.929201	NA	FOG: Leucine rich repeat	NA
32230	7446652	23	1.71236	10	0.79835	2.14488	0.466228	0.929201	protein kinase activity	Mitogen-activated protein kinase	Protein kinase.
25814	7442705	411	30.5992	179	14.2905	2.14123	0.467022	0.0732405	NA	NA	NA
269662	7452988	140	10.4231	61	4.86994	2.14029	0.467227	0.2108	NA	NA	NA
2906	7452889	344	25.611	150	11.9753	2.13866	0.467583	0.0865987	NA	NA	NA
11996	7448271	522	38.8632	228	18.2024	2.13506	0.468371	0.0641989	transferase activity, transferring phosphorus-containing groups	Glycosylphosphatidylinositol anchor synthesis protein	Transferring phosphorous-containing groups.
21954	7452060	1543	114.877	675	53.8886	2.13175	0.469098	0.0406257	NA	NA	NA
16584	7443493	16	1.19121	7	0.558845	2.13155	0.469142	0.999949	protein kinase activity	Serine/threonine protein kinase	NA
1055	7449748	16	1.19121	7	0.558845	2.13155	0.469142	0.999949	NA	NA	NA
12259	7449809	16	1.19121	7	0.558845	2.13155	0.469142	0.999949	ATP binding	DNA/RNA helicase MER3/SLH1, DEAD-box superfamily	In phosphorous-containing anhydrides.
1215	7445639	16	1.19121	7	0.558845	2.13155	0.469142	0.999949	catalytic activity	SMT3/SUMO-activating complex, AOS1/RAD31 component	Ubiquitin--protein ligase.
13378	7448957	16	1.19121	7	0.558845	2.13155	0.469142	0.999949	catalytic activity	Fe-S oxidoreductase	NA
8439	7445903	80	5.95604	35	2.79423	2.13155	0.469142	0.395075	catalytic activity	UDP-glucose 4-epimerase/UDP-sulfoquinovose synthase	Acting on carbohydrates and derivatives.
26678	7447630	4219	314.107	1846	147.375	2.13134	0.469189	0.0345384	transketolase activity	Transketolase	Transketolase.
2575	7450412	57	4.24368	25	1.99588	2.12622	0.470317	0.549717	molecular function unknown	Serine/threonine protein kinase involved in cell cycle control	NA
262203	7448803	357	26.5788	157	12.5341	2.12052	0.471582	0.0911483	NA	Predicted lipase	NA
22118	7446774	50	3.72252	22	1.75637	2.11944	0.471822	0.616308	protein kinase activity	Casein kinase (serine/threonine/tyrosine protein kinase)	NA
24591	7450562	18786	1398.63	8290	661.832	2.11327	0.473201	0.0355285	NA	NA	NA
16372	7452681	79	5.88159	35	2.79423	2.10491	0.47508	0.418252	oxidoreductase activity	Voltage-gated shaker-like K+ channel, subunit beta/KCNAB	Aryl-alcohol dehydrogenase (NADP+).
25441	7450910	264	19.6549	117	9.3407	2.10423	0.475234	0.124414	glucan 1,4-alpha-glucosidase activity	beta-1,6-N-acetylglucosaminyltransferase, contains WSC domain	Glucan 1,4-alpha-glucosidase.
260816	7453442	185	13.7733	82	6.54647	2.10393	0.4753	0.174013	diacylglycerol kinase activity	Predicted diacylglycerol kinase	Diacylglycerol kinase.
4743	7451943	36	2.68022	16	1.27736	2.09825	0.476588	0.777509	NA	NA	NA
22318	7446128	18	1.34011	8	0.63868	2.09825	0.476588	0.985649	NA	NA	NA
13884	7442148	18	1.34011	8	0.63868	2.09825	0.476588	0.985649	ATP binding	ATPase component of ABC transporters with duplicated ATPase domains/Translation elongation factor EF-3b	NA
31062	7445493	18	1.34011	8	0.63868	2.09825	0.476588	0.985649	NA	Anaphase promoting complex, Cdc20, Cdh1, and Ama1 subunits	NA
22846	7445204	9	0.670054	4	0.31934	2.09825	0.476588	1	NA	NA	NA
1192	7445625	9	0.670054	4	0.31934	2.09825	0.476588	1	NA	NA	NA
4386	7447920	9	0.670054	4	0.31934	2.09825	0.476588	1	extracellular region	NA	NA
7094	7447102	9	0.670054	4	0.31934	2.09825	0.476588	1	carotenoid biosynthesis	Phytoene desaturase	NA
1597	7443146	9	0.670054	4	0.31934	2.09825	0.476588	1	NA	NA	NA
264001	7445754	9	0.670054	4	0.31934	2.09825	0.476588	1	electron transport	NA	NA
5538	7448140	9	0.670054	4	0.31934	2.09825	0.476588	1	NA	NA	NA
36263	7443521	9	0.670054	4	0.31934	2.09825	0.476588	1	transport	Ammonia permease	NA
6173	7445934	9	0.670054	4	0.31934	2.09825	0.476588	1	NA	NA	NA
268080	7445308	9	0.670054	4	0.31934	2.09825	0.476588	1	intracellular	RasGAP SH3 binding protein rasputin, contains NTF2 and RRM domains	NA
264318	7442023	9	0.670054	4	0.31934	2.09825	0.476588	1	nucleic acid binding	Fasciclin and related adhesion glycoproteins	NA
262163	7453374	9	0.670054	4	0.31934	2.09825	0.476588	1	NA	NA	NA
23954	7443518	72	5.36044	32	2.55472	2.09825	0.476588	0.461806	NA	Nuclear receptor coregulator SMRT/SMRTER, contains Myb-like domains	NA
9557	7450491	54	4.02033	24	1.91604	2.09825	0.476588	0.591891	NA	RNA polymerase II, large subunit	NA
2120	7452180	58	4.31813	26	2.07571	2.08031	0.480697	0.569539	cell adhesion	Chitinase	NA
10744	7453093	29	2.15906	13	1.03786	2.08031	0.480697	0.870764	DNA binding	von Willebrand factor and related coagulation proteins	NA
20904	7443144	1211	90.1595	543	43.3504	2.07979	0.480819	0.0597156	NA	NA	NA
11563	7443382	49	3.64807	22	1.75637	2.07705	0.481451	0.649266	NA	NA	NA
37637	7441972	49	3.64807	22	1.75637	2.07705	0.481451	0.649266	ATP binding	Pleiotropic drug resistance proteins (PDR1-15), ABC superfamily	NA
11698	7443679	49	3.64807	22	1.75637	2.07705	0.481451	0.649266	NA	NA	NA
2293	7446495	458	34.0983	206	16.446	2.07335	0.482311	0.0948693	NA	NA	NA
8054	7453043	20	1.48901	9	0.718515	2.07234	0.482546	0.972212	NA	N-methyltransferase	NA
4807	7451349	20	1.48901	9	0.718515	2.07234	0.482546	0.972212	catalytic activity	NA	NA
22464	7451374	60	4.46703	27	2.15555	2.07234	0.482546	0.559049	lyase activity	NA	Fumarate hydratase.
25064	7450299	213	15.858	96	7.66416	2.06911	0.483301	0.171097	NA	NA	NA
10823	7442945	2362	175.852	1071	85.5033	2.05667	0.486223	0.0590514	NA	NA	NA
23081	7448614	555	41.32	252	20.1184	2.05384	0.486893	0.0934074	NA	Uncharacterized membrane protein	NA
264496	7442947	55	4.09478	25	1.99588	2.05162	0.48742	0.611625	oxidoreductase activity	Aldo/keto reductase family proteins	Aldose-6-phosphate reductase (NADPH).
8507	7450735	11	0.818955	5	0.399175	2.05162	0.48742	1	nucleic acid binding	Splicing coactivator SRm160/300, subunit SRm160 (contains PWI domain)	NA
5636	7448188	11	0.818955	5	0.399175	2.05162	0.48742	1	catalytic activity	5-formyltetrahydrofolate cyclo-ligase	5-formyltetrahydrofolate cyclo-ligase.
5913	7451117	11	0.818955	5	0.399175	2.05162	0.48742	1	DNA binding	Signaling protein SWIFT and related BRCT domain proteins	NA
17208	7447755	11	0.818955	5	0.399175	2.05162	0.48742	1	protein kinase CK2 complex	Casein kinase II, beta subunit	NA
261727	7444707	11	0.818955	5	0.399175	2.05162	0.48742	1	hormone activity	Nerve growth factor receptor TRKA and related tyrosine kinases	NA
27048	7450242	11	0.818955	5	0.399175	2.05162	0.48742	1	NA	Sodium/hydrogen exchanger protein	NA
21739	7444766	11	0.818955	5	0.399175	2.05162	0.48742	1	NA	NA	NA
10889	7444274	11	0.818955	5	0.399175	2.05162	0.48742	1	NA	NA	NA
32840	7445364	11	0.818955	5	0.399175	2.05162	0.48742	1	microtubule motor activity	Kinesin-like protein	NA
262698	7448395	11	0.818955	5	0.399175	2.05162	0.48742	1	NA	Protein involved in cell differentiation/sexual development	NA
264905	7448885	22	1.63791	10	0.79835	2.05162	0.48742	0.959693	electron transporter activity	Nuclear architecture related protein	NADH dehydrogenase (ubiquinone).
907	7447665	22	1.63791	10	0.79835	2.05162	0.48742	0.959693	hydrolase activity	NA	NA
263622	7447014	22	1.63791	10	0.79835	2.05162	0.48742	0.959693	metabolism	Chitinase	Chitinase.
22864	7444857	145	10.7953	66	5.26911	2.04879	0.488092	0.259242	electron transport	Dimethylglycine dehydrogenase precursor	Sarcosine dehydrogenase.
7900	7443486	134	9.97637	61	4.86994	2.04856	0.488147	0.278148	extracellular region	Serine/threonine protein kinase	NA
37485	7452729	79	5.88159	36	2.87406	2.04644	0.488654	0.45862	catalytic activity	Predicted alpha/beta hydrolase	NA
269683	7446945	274	20.3994	125	9.97938	2.04416	0.489199	0.152635	NA	Molecular chaperones mortalin/PBP74/GRP75, HSP70 superfamily	NA
35748	7450594	206	15.3368	94	7.50449	2.04368	0.489313	0.190449	NA	Dyneins, heavy chain	NA
4551	7448802	46	3.42472	21	1.67654	2.04274	0.489539	0.696567	NA	NA	NA
261694	7444022	116	8.63626	53	4.23126	2.04106	0.489941	0.326511	hydrolase activity	Purple acid phosphatase	Acid phosphatase.
2973	7450469	35	2.60577	16	1.27736	2.03996	0.490205	0.813023	NA	NA	NA
2519	7450387	35	2.60577	16	1.27736	2.03996	0.490205	0.813023	protein folding	Zuotin and related molecular chaperones (DnaJ superfamily), contains DNA-binding domains	NA
32139	7450352	24	1.78681	11	0.878185	2.03466	0.491482	0.943757	NA	Serine/threonine protein phosphatase	NA
23702	7443477	3618	269.362	1669	133.245	2.02156	0.494668	0.0673593	phosphopantetheine binding	NA	NA
3136	7441720	13	0.967856	6	0.47901	2.02053	0.494919	1	NA	NA	NA
23573	7447150	13	0.967856	6	0.47901	2.02053	0.494919	1	NA	NA	NA
263701	7446890	13	0.967856	6	0.47901	2.02053	0.494919	1	NA	Dolichol kinase	NA
22349	7446153	7417	552.199	3427	273.595	2.01831	0.495463	0.0653984	glyceraldehyde-3-phosphate dehydrogenase (phosphorylating) activity	Chitinase	NA
24657	7445763	2011	149.72	930	74.2466	2.01652	0.495903	0.0750487	transcription factor activity	NA	NA
23347	7446170	69	5.13708	32	2.55472	2.01082	0.497309	0.539202	NA	NA	NA
9329	7450565	125	9.30631	58	4.63043	2.00982	0.497558	0.327632	NA	NA	NA
264353	7450324	428	31.8648	199	15.8872	2.00569	0.49858	0.132916	binding	Mitochondrial tricarboxylate/dicarboxylate carrier proteins	NA
20600	7445026	58	4.31813	27	2.15555	2.00327	0.499185	0.618889	NA	NA	NA
6580	7446558	189	14.0711	88	7.02548	2.00287	0.499283	0.235353	NA	NA	NA
22809	7445164	670	49.8818	312	24.9085	2.0026	0.499351	0.108629	catalytic activity	NA	NA
21233	7450217	15	1.11676	7	0.558845	1.99833	0.500418	1	NA	NA	NA
11041	7444840	15	1.11676	7	0.558845	1.99833	0.500418	1	calcium ion binding	NA	NA
869	7445065	282	20.995	132	10.5382	1.99228	0.501939	0.179665	NA	von Willebrand factor and related coagulation proteins	NA
25838	7442646	4964	369.572	2324	185.537	1.99191	0.502031	0.0788252	NA	von Willebrand factor and related coagulation proteins	NA
25649	7448554	23982	1785.47	11231	896.627	1.99132	0.502179	0.0745295	exo-alpha-sialidase activity	RNA polymerase II transcription elongation factor DSIF/SUPT5H/SPT5	Exo-alpha-sialidase.
26041	7442998	16362	1218.16	7686	613.612	1.98523	0.503721	0.0781446	chitin binding	Chitinase	NA
5108	7449673	1458	108.549	685	54.687	1.98491	0.503801	0.0957662	calcium ion binding	NA	NA
35133	7444619	168	12.5077	79	6.30697	1.98315	0.504247	0.272034	NA	NA	NA
6534	7446340	34	2.53132	16	1.27736	1.98168	0.504623	0.849155	NA	Predicted membrane protein	NA
6931	7449228	17	1.26566	8	0.63868	1.98168	0.504623	1	integral to membrane	Peroxisomal membrane protein MPV17 and related proteins	NA
31382	7445283	17	1.26566	8	0.63868	1.98168	0.504623	1	NA	Aldehyde reductase	NA
260841	7445665	17	1.26566	8	0.63868	1.98168	0.504623	1	electron transporter activity	NADP/FAD dependent oxidoreductase	NADPH--ferrihemoprotein reductase.
29778	7448049	17	1.26566	8	0.63868	1.98168	0.504623	1	NA	Kinase A-anchor protein Neurobeachin and related BEACH and WD40 repeat proteins	NA
33680	7452268	102	7.59395	48	3.83208	1.98168	0.504623	0.412391	hydroxymethylglutaryl-CoA reductase (NADPH) activity	3-hydroxy-3-methylglutaryl-CoA (HMG-CoA) reductase	Hydroxymethylglutaryl-CoA reductase (NADPH).
25217	7453119	696	51.8175	328	26.1859	1.97883	0.505348	0.119774	NA	NA	NA
25357	7442968	1099	81.8211	518	41.3545	1.97853	0.505426	0.104888	NA	Nucleolar GTPase/ATPase p130	NA
269257	7444165	70	5.21153	33	2.63456	1.97815	0.505524	0.556825	subtilase activity	Subtilisin-related protease/Vacuolar protease B	NA
38775	7448886	70	5.21153	33	2.63456	1.97815	0.505524	0.556825	biosynthesis	N-acetylglucosaminyltransferase complex, subunit PIG-A/SPT14, required for phosphatidylinositol biosynthesis/Sulfolipid synthase	Hexosyltransferases.
4783	7443776	1416	105.422	668	53.3298	1.97679	0.50587	0.100307	NA	NA	NA
12500	7444770	36	2.68022	17	1.3572	1.97482	0.506375	0.830362	DNA binding	Chromatin remodeling complex WSTF-ISWI, small subunit	In phosphorous-containing anhydrides.
24931	7451588	3547	264.076	1676	133.803	1.97361	0.506686	0.0903166	electron transporter activity	Thioredoxin/protein disulfide isomerase	Protein disulfide isomerase.
23982	7443548	74	5.50934	35	2.79423	1.97169	0.50718	0.539104	NA	Predicted histone tail methylase containing SET domain	NA
267997	7446830	19	1.41456	9	0.718515	1.96873	0.507943	0.992865	DNA binding	Transcription-coupled repair protein CSB/RAD26 (contains SNF2 family DNA-dependent ATPase domain)	Adenosinetriphosphatase.
36835	7445781	19	1.41456	9	0.718515	1.96873	0.507943	0.992865	protein kinase activity	Ca2+/calmodulin-dependent protein kinase, EF-Hand protein superfamily	NA
5690	7445230	38	2.82912	18	1.43703	1.96873	0.507943	0.812566	NA	NA	NA
4007	7452760	1059	78.8431	502	40.0772	1.96728	0.508316	0.111271	zinc ion binding	Zinc-binding oxidoreductase	NA
1011	7453151	232	17.2725	110	8.78185	1.96684	0.508429	0.226414	protein amino acid dephosphorylation	Dual specificity phosphatase	NA
17002	7443826	61	4.54148	29	2.31522	1.96158	0.509793	0.62566	ATP binding	AAA+-type ATPase	NA
10647	7442110	42	3.12692	20	1.5967	1.95836	0.51063	0.779663	NA	Projectin/twitchin and related proteins	NA
37942	7442137	21	1.56346	10	0.79835	1.95836	0.51063	0.979498	NA	Uncharacterized conserved protein, contains WD40 repeats	NA
21280	7444632	21	1.56346	10	0.79835	1.95836	0.51063	0.979498	nucleic acid binding	mRNA cleavage factor I subunit/CPSF subunit	NA
1422	7449137	21	1.56346	10	0.79835	1.95836	0.51063	0.979498	NA	Chromosome condensation complex Condensin, subunit G	NA
1081	7449756	21	1.56346	10	0.79835	1.95836	0.51063	0.979498	NA	Zn-finger transcription factor	NA
25906	7452015	21	1.56346	10	0.79835	1.95836	0.51063	0.979498	NA	NA	NA
263096	7446214	21	1.56346	10	0.79835	1.95836	0.51063	0.979498	chitinase activity	Predicted chitinase	NA
24759	7451620	1509	112.346	719	57.4014	1.9572	0.510935	0.10887	NA	LRR-containing protein	NA
1957	7452560	279	20.7717	133	10.6181	1.95626	0.511179	0.207327	NA	NA	NA
1310	7451533	130	9.67856	62	4.94977	1.95536	0.511416	0.359314	electron transport	D-aspartate oxidase	D-amino acid oxidase.
5357	7449630	44	3.27582	21	1.67654	1.95392	0.511791	0.764418	NA	von Willebrand factor and related coagulation proteins	NA
1665	7445521	44	3.27582	21	1.67654	1.95392	0.511791	0.764418	electron transporter activity	NA	NA
21076	7452581	467	34.7684	223	17.8032	1.95293	0.512052	0.159712	NA	NA	NA
11817	7443892	23	1.71236	11	0.878185	1.94989	0.51285	0.967022	NA	DNA topoisomerase I	NA
23597	7450573	515	38.342	247	19.7192	1.94439	0.514299	0.158749	NA	NA	NA
10722	7442149	25	1.86126	12	0.95802	1.94282	0.514715	0.955349	tRNA ligase activity	Splicing coactivator SRm160/300, subunit SRm300	NA
261771	7448733	25	1.86126	12	0.95802	1.94282	0.514715	0.955349	NA	Adenylate kinase	NA
4312	7452639	25	1.86126	12	0.95802	1.94282	0.514715	0.955349	NA	NA	NA
5828	7442314	254	18.9104	122	9.73987	1.94155	0.515053	0.232209	NA	NA	NA
21058	7452545	331	24.6431	159	12.6938	1.94136	0.515104	0.197414	NA	Cytoskeleton-associated protein and related proteins	NA
262283	7451951	54	4.02033	26	2.07571	1.93684	0.516304	0.691564	catalytic activity	Acyl-CoA synthetase	4-coumarate--CoA ligase.
264276	7444298	27	2.01016	13	1.03786	1.93684	0.516304	0.93695	transmembrane receptor protein serine/threonine kinase activity	Vacuolar assembly/sorting protein VPS8	Phosphotransferases with an alcohol group as acceptor.
25805	7449453	6535	486.534	3151	251.56	1.93407	0.517045	0.107098	NA	beta-1,6-N-acetylglucosaminyltransferase, contains WSC domain	NA
21513	7450428	2693	200.495	1300	103.786	1.93182	0.517646	0.113991	transcription factor activity	Heat shock transcription factor	NA
8420	7445891	29	2.15906	14	1.11769	1.93172	0.517673	0.917463	monooxygenase activity	Kynurenine 3-monooxygenase and related flavoprotein monooxygenases	Kynurenine 3-monooxygenase.
9619	7447891	683	50.8497	330	26.3456	1.93011	0.518107	0.152425	NA	Projectin/twitchin and related proteins	NA
9479	7446934	449	33.4283	217	17.3242	1.92957	0.51825	0.177795	NA	NA	NA
32899	7451683	528	39.3099	256	20.4378	1.92339	0.519914	0.171206	integral to membrane	Macrophage maturation-associated protein	NA
9976	7441834	101	7.5195	49	3.91192	1.9222	0.520236	0.465208	protein binding	NA	NA
25280	7444230	70	5.21153	34	2.71439	1.91996	0.520843	0.600489	NA	Beta, beta-carotene 15,15'-dioxygenase and related enzymes	NA
24714	7447872	245	18.2404	119	9.50037	1.91996	0.520843	0.254469	metabolism	Phosphate acyltransferase	NA
262412	7451728	35	2.60577	17	1.3572	1.91996	0.520843	0.86546	metalloendopeptidase activity	N-arginine dibasic convertase NRD1 and related Zn2+-dependent endopeptidases, insulinase superfamily	Insulysin.
4481	7453392	609	45.3403	296	23.6312	1.91867	0.521195	0.166185	catalytic activity	Predicted hydrolase (HAD superfamily)	NA
21274	7444627	72	5.36044	35	2.79423	1.9184	0.521268	0.590748	NA	NA	NA
11974	7442699	74	5.50934	36	2.87406	1.91692	0.521671	0.581355	intracellular signaling cascade	RAVE (regulator of V-ATPase assembly) complex subunit RAV1/DMX protein, WD repeat superfamily	Glucan 1,4-alpha-glucosidase.
264145	7450868	37	2.75467	18	1.43703	1.91692	0.521671	0.84707	NA	NA	NA
9632	7450526	111	8.264	54	4.31109	1.91692	0.521671	0.439319	NA	NA	NA
38460	7443340	47	3.49917	23	1.83621	1.90565	0.524754	0.765975	NA	SCF ubiquitin ligase, Skp1 component	NA
263371	7450131	47	3.49917	23	1.83621	1.90565	0.524754	0.765975	NA	Uncharacterized conserved protein	NA
4320	7447507	51	3.79698	25	1.99588	1.90241	0.525649	0.73683	NA	Nucleolar GTPase/ATPase p130	NA
12695	7450323	110	8.18955	54	4.31109	1.89965	0.526413	0.45742	1,3-beta-glucan synthase complex	1,3-beta-glucan synthase/callose synthase catalytic subunit	NA
262646	7444904	112	8.33845	55	4.39093	1.89902	0.526587	0.452395	NA	LRR-containing protein	NA
12107	7442686	234	17.4214	115	9.18103	1.89755	0.526997	0.279661	NA	NA	NA
40393	7446147	1529	113.835	752	60.0359	1.89611	0.527395	0.148648	pyruvate kinase activity	Pyruvate kinase	Pyruvate kinase.
33497	7452597	420	31.2692	207	16.5258	1.89214	0.528502	0.213827	NA	Predicted dioxygenase	NA
24017	7448086	1424	106.017	702	56.0442	1.89168	0.528631	0.153548	metabolism	PHD finger protein AF10	NA
21092	7442426	1732	128.948	855	68.2589	1.8891	0.529351	0.151122	metabolism	NA	NA
23494	7444154	89	6.62609	44	3.51274	1.8863	0.530137	0.538927	NA	Chitinase	NA
25736	7442845	6775	504.402	3360	268.246	1.88037	0.531809	0.142497	NA	FOG: Predicted E3 ubiquitin ligase	NA
20786	7451440	14836	1104.55	7360	587.586	1.87981	0.53197	0.13963	extracellular region	Serine proteinase inhibitor (KU family) with thrombospondin repeats	NA
25414	7444823	683	50.8497	339	27.0641	1.87886	0.532237	0.18858	NA	NA	NA
22428	7451344	2543	189.328	1266	101.071	1.87321	0.533843	0.156539	NA	Polyadenylate-binding protein (RRM superfamily)	NA
22245	7453364	697	51.892	347	27.7027	1.87317	0.533854	0.192616	NA	Predicted transporter/transmembrane protein	NA
24164	7451100	239	17.7937	119	9.50037	1.87295	0.533918	0.299888	NA	NA	NA
24858	7452684	731	54.4233	364	29.0599	1.87279	0.533961	0.190187	NA	NA	NA
28651	7445977	550	40.9478	274	21.8748	1.87192	0.534212	0.209437	acetyl-CoA C-acetyltransferase activity	Acetyl-CoA acetyltransferase	Acetyl-CoA C-acetyltransferase.
21776	7451678	8343	621.14	4158	331.954	1.87116	0.534427	0.148508	NA	Nucleolar GTPase/ATPase p130	NA
20703	7445295	794	59.1137	396	31.6147	1.86982	0.534811	0.188403	NA	Nucleolar GTPase/ATPase p130	NA
263213	7450649	32	2.38242	16	1.27736	1.86511	0.536162	0.912469	extracellular region	Defense-related protein containing SCP domain	NA
12137	7451994	32	2.38242	16	1.27736	1.86511	0.536162	0.912469	NA	NA	NA
22666	7449581	32	2.38242	16	1.27736	1.86511	0.536162	0.912469	NA	Chitinase	NA
9835	7452680	8	0.595604	4	0.31934	1.86511	0.536162	1	NA	NA	NA
9287	7450543	8	0.595604	4	0.31934	1.86511	0.536162	1	catalytic activity	Carboxylesterase and related proteins	NA
21611	7442465	16	1.19121	8	0.63868	1.86511	0.536162	1	cysteine-type endopeptidase activity	Cysteine proteinase Cathepsin L	Cysteine endopeptidases.
8058	7453046	16	1.19121	8	0.63868	1.86511	0.536162	1	calcium ion binding	NA	NA
10244	7450285	8	0.595604	4	0.31934	1.86511	0.536162	1	NA	NA	NA
10616	7453140	8	0.595604	4	0.31934	1.86511	0.536162	1	electron transporter activity	NA	NA
277	7443093	16	1.19121	8	0.63868	1.86511	0.536162	1	catalytic activity	Oxidosqualene-lanosterol cyclase and related proteins	Cycloartenol synthase.
11887	7448221	8	0.595604	4	0.31934	1.86511	0.536162	1	NA	SNF2 family DNA-dependent ATPase	NA
31938	7452172	8	0.595604	4	0.31934	1.86511	0.536162	1	RNA binding	Translational repressor MPT5/PUF4 and related RNA-binding proteins (Puf superfamily)	NA
32596	7452115	8	0.595604	4	0.31934	1.86511	0.536162	1	trypsin activity	Trypsin	NA
2240	7446471	8	0.595604	4	0.31934	1.86511	0.536162	1	NA	Chitinase	NA
6422	7444547	8	0.595604	4	0.31934	1.86511	0.536162	1	NA	NA	NA
17966	7448531	8	0.595604	4	0.31934	1.86511	0.536162	1	N-acetylglucosaminyldiphosphodolichol N-acetylglucosaminyltransferase activity	Predicted glycosyltransferase	N-acetylglucosaminyldiphosphodolichol N-acetylglucosaminyltransferase.
4454	7453377	14	1.04231	7	0.558845	1.86511	0.536162	1	oxidoreductase activity, acting on paired donors, with incorporation or reduction of molecular oxygen, 2-oxoglutarate as one donor, and incorporation of one atom each of oxygen into both donors	EGL-Nine (EGLN) protein	NA
6825	7449175	14	1.04231	7	0.558845	1.86511	0.536162	1	NA	NA	NA
31276	7442870	14	1.04231	7	0.558845	1.86511	0.536162	1	NA	Phosphatidylinositol-4-phosphate 5-kinase	NA
21620	7441729	14	1.04231	7	0.558845	1.86511	0.536162	1	NA	Threonine aldolase	NA
268451	7444076	14	1.04231	7	0.558845	1.86511	0.536162	1	transcription factor activity	ATP-dependent RNA helicase	NA
260982	7445240	6	0.446703	3	0.239505	1.86511	0.536162	1	NA	NA	NA
3174	7441740	6	0.446703	3	0.239505	1.86511	0.536162	1	NA	Zinc-binding oxidoreductase	NA
3895	7445385	6	0.446703	3	0.239505	1.86511	0.536162	1	NA	Uncharacterized conserved protein	NA
3305	7444070	6	0.446703	3	0.239505	1.86511	0.536162	1	NA	Nuclear localization sequence binding protein	NA
6029	7448569	6	0.446703	3	0.239505	1.86511	0.536162	1	NA	Nucleolar GTPase/ATPase p130	NA
6661	7446601	6	0.446703	3	0.239505	1.86511	0.536162	1	NA	NA	NA
15142	7442783	6	0.446703	3	0.239505	1.86511	0.536162	1	prenyltransferase activity	Heme A farnesyltransferase	NA
36013	7450177	6	0.446703	3	0.239505	1.86511	0.536162	1	metabolism	Peroxisomal multifunctional beta-oxidation protein and related enzymes	NA
25377	7444777	6	0.446703	3	0.239505	1.86511	0.536162	1	potassium channel activity	K+-channel ERG and related proteins, contain PAS/PAC sensor domain	NA
5688	7444861	6	0.446703	3	0.239505	1.86511	0.536162	1	NA	U2 snRNP splicing factor, small subunit, and related proteins	NA
5590	7448165	6	0.446703	3	0.239505	1.86511	0.536162	1	NA	NA	NA
18662	7450853	6	0.446703	3	0.239505	1.86511	0.536162	1	ATP binding	Uridylate kinase/adenylate kinase	Adenylate kinase.
4490	7446084	6	0.446703	3	0.239505	1.86511	0.536162	1	NA	NA	NA
38685	7442823	6	0.446703	3	0.239505	1.86511	0.536162	1	microtubule motor activity	Kinesin-like protein	NA
1196	7449136	6	0.446703	3	0.239505	1.86511	0.536162	1	NA	NA	NA
6198	7445951	6	0.446703	3	0.239505	1.86511	0.536162	1	NA	Histone acetyltransferase SAGA/ADA, catalytic subunit PCAF/GCN5 and related proteins	NA
261023	7446808	6	0.446703	3	0.239505	1.86511	0.536162	1	NA	FOG: Leucine rich repeat	NA
261393	7450376	6	0.446703	3	0.239505	1.86511	0.536162	1	NA	Histone deacetylase complex, catalytic component RPD3	NA
34826	7442382	6	0.446703	3	0.239505	1.86511	0.536162	1	NA	U1-like Zn-finger-containing protein, probabl erole in RNA processing/splicing	NA
31726	7452325	6	0.446703	3	0.239505	1.86511	0.536162	1	protein folding	Molecular chaperone (DnaJ superfamily)	NA
4922	7452261	50	3.72252	25	1.99588	1.86511	0.536162	0.767422	subtilase activity	NA	NA
4348	7453321	34	2.53132	17	1.3572	1.86511	0.536162	0.895127	NA	NA	NA
21606	7443483	130	9.67856	65	5.18928	1.86511	0.536162	0.440165	peroxidase activity	Ca2+-modulated nonselective cation channel polycystin	Licheninase.
23084	7448617	62	4.61593	31	2.47489	1.86511	0.536162	0.687492	NA	NA	NA
6585	7446561	94	6.99835	47	3.75225	1.86511	0.536162	0.538896	protein binding	Speckle-type POZ protein SPOP and related proteins with TRAF, MATH and BTB/POZ domains	NA
3450	7451658	28	2.08461	14	1.11769	1.86511	0.536162	0.95032	N-acetyltransferase activity	NA	NA
7845	7451025	46	3.42472	23	1.83621	1.86511	0.536162	0.796314	peptidyl-prolyl cis-trans isomerase activity	C-type lectin	Peptidylprolyl isomerase.
11734	7442808	350	26.0577	175	13.9711	1.86511	0.536162	0.255488	NA	NA	NA
25687	7449477	64	4.76483	32	2.55472	1.86511	0.536162	0.675755	myosin ATPase activity	Uncharacterized conserved coiled-coil protein	Myosin ATPase.
7293	7450604	20	1.48901	10	0.79835	1.86511	0.536162	0.999627	NA	NA	NA
260891	7446840	20	1.48901	10	0.79835	1.86511	0.536162	0.999627	RNA splicing	U4/U6 small nuclear ribonucleoprotein Prp4 (contains WD40 repeats)	NA
7810	7452381	18	1.34011	9	0.718515	1.86511	0.536162	1	NA	NA	NA
18089	7445558	18	1.34011	9	0.718515	1.86511	0.536162	1	NA	Alkyl hydroperoxide reductase, thiol specific antioxidant and related enzymes	NA
269254	7444159	18	1.34011	9	0.718515	1.86511	0.536162	1	regulation of cell cycle	Transcription factor E2F/dimerization partner (TDP)	NA
10224	7450273	18	1.34011	9	0.718515	1.86511	0.536162	1	NA	NA	NA
6547	7444615	30	2.23351	15	1.19753	1.86511	0.536162	0.930835	NA	Anion exchanger adaptor protein Kanadaptin, contains FHA domain	NA
34412	7448145	12	0.893406	6	0.47901	1.86511	0.536162	1	NA	Uncharacterized conserved protein similar to ATP/GTP-binding protein	NA
264523	7442993	12	0.893406	6	0.47901	1.86511	0.536162	1	catalytic activity	Hormone-sensitive lipase HSL	Carboxylic ester hydrolases.
261063	7445520	12	0.893406	6	0.47901	1.86511	0.536162	1	NA	NA	NA
260866	7445649	12	0.893406	6	0.47901	1.86511	0.536162	1	NA	Origin recognition complex, subunit 2	NA
264268	7441953	12	0.893406	6	0.47901	1.86511	0.536162	1	two-component response regulator activity	NA	NA
31737	7450258	12	0.893406	6	0.47901	1.86511	0.536162	1	catalytic activity	Predicted fumarylacetoacetate hydralase	Transposing C==C bonds.
5332	7446461	12	0.893406	6	0.47901	1.86511	0.536162	1	molecular function unknown	Uncharacterized conserved protein	NA
20421	7452912	12	0.893406	6	0.47901	1.86511	0.536162	1	nucleic acid binding	mRNA cleavage and polyadenylation factor I complex, subunit RNA15	Peptidylprolyl isomerase.
260923	7451458	12	0.893406	6	0.47901	1.86511	0.536162	1	catalytic activity	NA	NA
38047	7444828	12	0.893406	6	0.47901	1.86511	0.536162	1	UDP-N-acetylmuramoylalanyl-D-glutamyl-2,6-diaminopimelate-D-alanyl-D-alanine ligase activity	FOG: RCC1 domain	Acid--D-amino-acid ligases (peptide synthases).
7699	7452858	22	1.63791	11	0.878185	1.86511	0.536162	0.986454	NA	NA	NA
260875	7445492	10	0.744505	5	0.399175	1.86511	0.536162	1	NA	Predicted Zn-dependent hydrolase (beta-lactamase superfamily)	NA
7840	7444976	10	0.744505	5	0.399175	1.86511	0.536162	1	NA	NA	NA
262527	7453173	10	0.744505	5	0.399175	1.86511	0.536162	1	NA	NA	NA
10223	7450272	10	0.744505	5	0.399175	1.86511	0.536162	1	NA	Serine proteinase inhibitor (KU family) with thrombospondin repeats	NA
8372	7451087	10	0.744505	5	0.399175	1.86511	0.536162	1	NA	NA	NA
23679	7452418	10	0.744505	5	0.399175	1.86511	0.536162	1	NA	Diphthamide biosynthesis protein	NA
8459	7446860	10	0.744505	5	0.399175	1.86511	0.536162	1	NA	NA	NA
7182	7447144	10	0.744505	5	0.399175	1.86511	0.536162	1	NA	NA	NA
7996	7449323	10	0.744505	5	0.399175	1.86511	0.536162	1	NA	Transcription regulator XNP/ATRX, DEAD-box superfamily	NA
38054	7444248	10	0.744505	5	0.399175	1.86511	0.536162	1	NA	Multitransmembrane protein	NA
33970	7442052	10	0.744505	5	0.399175	1.86511	0.536162	1	DNA binding	RNA polymerase II transcription initiation/nucleotide excision repair factor TFIIH, 3'-5' helicase subunit SSL2	In phosphorous-containing anhydrides.
262854	7445940	10	0.744505	5	0.399175	1.86511	0.536162	1	NA	NA	NA
18613	7444550	10	0.744505	5	0.399175	1.86511	0.536162	1	proteolysis and peptidolysis	ATP-dependent Clp protease, proteolytic subunit	Endopeptidase Clp.
3157	7442478	10	0.744505	5	0.399175	1.86511	0.536162	1	NA	NA	NA
20469	7442311	4	0.297802	2	0.15967	1.86511	0.536162	1	DNA-directed RNA polymerase activity	DNA-directed RNA polymerase, subunit RPB10	DNA-directed RNA polymerase.
16039	7445853	4	0.297802	2	0.15967	1.86511	0.536162	1	damaged DNA binding	Mismatch repair ATPase MSH5 (MutS family)	NA
2301	7450190	4	0.297802	2	0.15967	1.86511	0.536162	1	NA	NA	NA
261211	7452181	4	0.297802	2	0.15967	1.86511	0.536162	1	molecular function unknown	NA	NA
2535	7444680	4	0.297802	2	0.15967	1.86511	0.536162	1	NA	NA	NA
34878	7444597	4	0.297802	2	0.15967	1.86511	0.536162	1	catalytic activity	Predicted alpha/beta hydrolase	NA
260919	7451454	4	0.297802	2	0.15967	1.86511	0.536162	1	catalytic activity	Phosphoglycerate mutase	Phosphoglycerate mutase.
11794	7443879	4	0.297802	2	0.15967	1.86511	0.536162	1	NA	NA	NA
261637	7452802	4	0.297802	2	0.15967	1.86511	0.536162	1	NA	NA	NA
6745	7446203	4	0.297802	2	0.15967	1.86511	0.536162	1	NA	Chromatin-associated protein Dek and related proteins, contains SAP DNA binding domain	NA
263203	7444155	4	0.297802	2	0.15967	1.86511	0.536162	1	amidase activity	Amidases	Carbon--nitrogen ligases with glutamine as amido-N-donor.
32971	7444031	4	0.297802	2	0.15967	1.86511	0.536162	1	NA	Trypsin	NA
261180	7445075	4	0.297802	2	0.15967	1.86511	0.536162	1	NA	LRR-containing protein	NA
8253	7451032	4	0.297802	2	0.15967	1.86511	0.536162	1	triacylglycerol lipase activity	Predicted lipase/calmodulin-binding heat-shock protein	NA
35740	7447143	4	0.297802	2	0.15967	1.86511	0.536162	1	metabolism	Reductases with broad range of substrate specificities	2,3-dihydro-2,3-dihydroxybenzoate dehydrogenase.
13920	7449648	4	0.297802	2	0.15967	1.86511	0.536162	1	nucleic acid binding	Poly(A) polymerase and related nucleotidyltransferases	Polynucleotide adenylyltransferase.
7910	7449280	4	0.297802	2	0.15967	1.86511	0.536162	1	NA	Myosin class II heavy chain	NA
1975	7452571	4	0.297802	2	0.15967	1.86511	0.536162	1	NA	Uncharacterized coiled-coil protein	NA
263716	7450760	4	0.297802	2	0.15967	1.86511	0.536162	1	NA	NA	NA
264925	7442681	4	0.297802	2	0.15967	1.86511	0.536162	1	electron transporter activity	NADP/FAD dependent oxidoreductase	NA
3893	7452089	4	0.297802	2	0.15967	1.86511	0.536162	1	S-adenosylmethionine-dependent methyltransferase activity	SAM-dependent methyltransferases	NA
10063	7441959	2	0.148901	1	0.079835	1.86511	0.536162	1	iron ion binding	NA	NA
4352	7453323	2	0.148901	1	0.079835	1.86511	0.536162	1	NA	SNARE protein PEP12/VAM3/Syntaxin 7/Syntaxin 17	NA
31358	7445536	2	0.148901	1	0.079835	1.86511	0.536162	1	NA	TPR repeat-containing protein	NA
10298	7443987	2	0.148901	1	0.079835	1.86511	0.536162	1	calcium ion binding	FOG: Leucine rich repeat	NA
260861	7445646	2	0.148901	1	0.079835	1.86511	0.536162	1	nucleotide binding	AAA+-type ATPase	Adenosinetriphosphatase.
2078	7452158	2	0.148901	1	0.079835	1.86511	0.536162	1	NA	NA	NA
263116	7449180	2	0.148901	1	0.079835	1.86511	0.536162	1	electron transport	NA	NA
262000	7446718	2	0.148901	1	0.079835	1.86511	0.536162	1	NA	NA	NA
4590	7446134	2	0.148901	1	0.079835	1.86511	0.536162	1	proteolysis and peptidolysis	NA	NA
33193	7452793	2	0.148901	1	0.079835	1.86511	0.536162	1	signal transducer activity	K+-channel ERG and related proteins, contain PAS/PAC sensor domain	NA
5191	7449720	2	0.148901	1	0.079835	1.86511	0.536162	1	calcium ion binding	Ca2+/calmodulin-dependent protein kinase, EF-Hand protein superfamily	NA
7003	7444137	2	0.148901	1	0.079835	1.86511	0.536162	1	NA	NA	NA
7610	7445616	2	0.148901	1	0.079835	1.86511	0.536162	1	NA	NA	NA
35459	7450606	2	0.148901	1	0.079835	1.86511	0.536162	1	metabolism	17 beta-hydroxysteroid dehydrogenase type 3, HSD17B3	With NAD(+) or NADP(+) as acceptor.
262253	7443725	2	0.148901	1	0.079835	1.86511	0.536162	1	NA	Kinesin light chain	NA
261778	7448740	2	0.148901	1	0.079835	1.86511	0.536162	1	transporter activity	Sugar transporter/spinster transmembrane protein	NA
262006	7442032	2	0.148901	1	0.079835	1.86511	0.536162	1	carbonate dehydratase activity	Carbonic anhydrase	NA
261453	7446663	2	0.148901	1	0.079835	1.86511	0.536162	1	DNA binding	Transcription factor MEIS1 and related HOX domain proteins	NA
268493	7441874	2	0.148901	1	0.079835	1.86511	0.536162	1	metabolism	Mitochondrial/plastidial beta-ketoacyl-ACP reductase	3-oxoacyl-[acyl-carrier protein] reductase.
5770	7444907	2	0.148901	1	0.079835	1.86511	0.536162	1	NA	NA	NA
19631	7449081	2	0.148901	1	0.079835	1.86511	0.536162	1	calcium ion binding	Calmodulin and related proteins (EF-Hand superfamily)	NA
263929	7448006	2	0.148901	1	0.079835	1.86511	0.536162	1	transporter activity	NA	NA
6638	7450633	2	0.148901	1	0.079835	1.86511	0.536162	1	NA	FOG: Ankyrin repeat	NA
31732	7452921	2	0.148901	1	0.079835	1.86511	0.536162	1	NA	26S proteasome regulatory complex, subunit PSMD10	NA
36407	7446884	2	0.148901	1	0.079835	1.86511	0.536162	1	indole-3-glycerol-phosphate synthase activity	Anthranilate synthase component II	NA
264869	7449431	2	0.148901	1	0.079835	1.86511	0.536162	1	ATP binding	DEAD-box like helicase	In phosphorous-containing anhydrides.
8573	7450769	2	0.148901	1	0.079835	1.86511	0.536162	1	NA	NA	NA
11788	7442835	2	0.148901	1	0.079835	1.86511	0.536162	1	NA	NA	NA
5891	7442333	2	0.148901	1	0.079835	1.86511	0.536162	1	NA	NA	NA
15976	7445069	2	0.148901	1	0.079835	1.86511	0.536162	1	tRNA ligase activity	Tyrosyl-tRNA synthetase, cytoplasmic	Tyrosine--tRNA ligase.
25899	7452011	2	0.148901	1	0.079835	1.86511	0.536162	1	NA	NA	NA
262668	7442309	2	0.148901	1	0.079835	1.86511	0.536162	1	transcription factor activity	Heat shock transcription factor	NA
268987	7448387	2	0.148901	1	0.079835	1.86511	0.536162	1	hydrolase activity, hydrolyzing O-glycosyl compounds	NA	NA
10577	7444175	2	0.148901	1	0.079835	1.86511	0.536162	1	NA	NA	NA
31391	7449065	2	0.148901	1	0.079835	1.86511	0.536162	1	microtubule motor activity	Kinesin-like protein	NA
32741	7451654	2	0.148901	1	0.079835	1.86511	0.536162	1	NA	Mitochondrial matrix protein frataxin, involved in Fe/S protein biosynthesis	NA
20833	7442905	2	0.148901	1	0.079835	1.86511	0.536162	1	NA	Predicted methyltransferase	NA
264495	7442946	2	0.148901	1	0.079835	1.86511	0.536162	1	NA	NA	NA
40265	7453336	2	0.148901	1	0.079835	1.86511	0.536162	1	molecular function unknown	Predicted exosome subunit	NA
2032	7446800	2	0.148901	1	0.079835	1.86511	0.536162	1	NA	NA	NA
21332	7444693	733	54.5722	368	29.3793	1.85751	0.538356	0.20431	membrane	Magnesium transporters: CorA family	NA
31447	7449149	406	30.2269	204	16.2863	1.85597	0.538803	0.248848	binding	Mitochondrial FAD carrier protein	NA
7704	7452860	183	13.6244	92	7.34482	1.85497	0.539092	0.366685	electron transport	Monodehydroascorbate/ferredoxin reductase	NA
3284	7444062	220	16.3791	111	8.86169	1.84831	0.541036	0.338454	NA	NA	NA
1946	7449776	1724	128.353	871	69.5363	1.84584	0.54176	0.183432	NA	NA	NA
37054	7453033	3143	233.998	1589	126.858	1.84457	0.542132	0.175589	peroxidase activity	NA	Cytochrome-c peroxidase.
8472	7446866	1890	140.711	956	76.3223	1.84365	0.542403	0.183405	catalytic activity	Lysophospholipase	Acylglycerol lipase.
3487	7451675	150	11.1676	76	6.06746	1.84057	0.543311	0.426702	nucleic acid binding	Transcription factor, contains HOX domain	NA
42946	7448533	744	55.3912	377	30.0978	1.84037	0.543368	0.219655	biosynthesis	Choline phosphate cytidylyltransferase/Predicted CDP-ethanolamine synthase	Ethanolamine-phosphate cytidylyltransferase.
13254	7446092	71	5.28598	36	2.87406	1.8392	0.543713	0.65843	nucleic acid binding	ATP-dependent RNA helicase	Adenosinetriphosphatase.
22823	7448166	573	42.6601	291	23.232	1.83627	0.544583	0.239364	NA	Mod5 protein sorting/negative effector of RNA Pol III synthesis	NA
2107	7442197	726	54.0511	369	29.4591	1.83478	0.545024	0.226298	NA	NA	NA
23509	7447090	2479	184.563	1260	100.592	1.83476	0.545029	0.186014	proteolysis and peptidolysis	NA	NA
20661	7442935	55	4.09478	28	2.23538	1.8318	0.54591	0.755747	NA	Transcriptional corepressor Atrophin-1/DRPLA	NA
22517	7447237	1180	87.8516	602	48.0607	1.82793	0.547067	0.211415	NA	NA	NA
261394	7444662	47	3.49917	24	1.91604	1.82625	0.547569	0.811497	oxidoreductase activity	Aldo/keto reductase family proteins	Oxidoreductases.
25087	7443993	466	34.6939	238	19.0007	1.82593	0.547667	0.264157	NA	NA	NA
24491	7445829	45	3.35027	23	1.83621	1.82456	0.548076	0.827099	NA	NA	NA
21595	7442439	2645	196.922	1353	108.017	1.82306	0.548527	0.196569	protein binding	von Willebrand factor and related coagulation proteins	Glucan 1,4-alpha-glucosidase.
3607	7441925	260	19.3571	133	10.6181	1.82304	0.548535	0.336489	NA	Nucleolar GTPase/ATPase p130	NA
10879	7442972	588	43.7769	301	24.0303	1.82173	0.548928	0.251267	NA	NA	NA
3107	7442449	989	73.6315	507	40.4763	1.81912	0.549715	0.226703	NA	NA	NA
29547	7450784	39	2.90357	20	1.5967	1.81848	0.549909	0.875915	transferase activity, transferring pentosyl groups	Purine nucleoside phosphorylase	Purine-nucleoside phosphorylase.
31128	7446812	458	34.0983	235	18.7612	1.81749	0.55021	0.273443	photosynthesis light harvesting	NA	NA
1555	7449782	74	5.50934	38	3.03373	1.81603	0.550653	0.66299	NA	C-type lectin	NA
6629	7446581	37	2.75467	19	1.51687	1.81603	0.550653	0.891507	NA	NA	NA
6678	7446611	37	2.75467	19	1.51687	1.81603	0.550653	0.891507	DNA-directed RNA polymerase activity	von Willebrand factor and related coagulation proteins	DNA-directed RNA polymerase.
7478	7450122	560	41.6923	288	22.9925	1.8133	0.551481	0.262441	thiosulfate sulfurtransferase activity	Mercaptopyruvate sulfurtransferase/thiosulfate sulfurtransferase	Thiosulfate sulfurtransferase.
25372	7442986	7367	548.477	3795	302.974	1.81031	0.552391	0.199206	NA	von Willebrand factor and related coagulation proteins	NA
3580	7441911	66	4.91373	34	2.71439	1.81025	0.552409	0.706834	NA	Ankyrin	NA
8524	7450745	1617	120.386	833	66.5026	1.81025	0.552409	0.219493	electron transport	NA	NAD(P)(+) transhydrogenase (AB-specific).
23735	7445576	427	31.7904	220	17.5637	1.81	0.552485	0.288105	NA	NA	NA
23821	7452861	130	9.67856	67	5.34895	1.80943	0.552659	0.494665	NA	NA	NA
12441	7450417	386	28.7379	199	15.8872	1.80887	0.55283	0.300051	acid phosphatase activity	Arp2/3 complex-interacting protein VIP1/Asp1, involved in regulation of actin cytoskeleton	NA
6720	7446188	31	2.30797	16	1.27736	1.80682	0.553457	0.943684	NA	Chitinase	NA
5829	7447217	217	16.1558	112	8.94152	1.80682	0.553457	0.382356	glyceraldehyde-3-phosphate dehydrogenase (phosphorylating) activity	Plexins (functional semaphorin receptors)	NA
10673	7442121	60	4.46703	31	2.47489	1.80494	0.554034	0.744312	DNA binding	NA	NA
17961	7445730	443	32.9816	229	18.2822	1.80402	0.554316	0.291111	NA	N-methyl-D-aspartate receptor glutamate-binding subunit	NA
3694	7451312	787	58.5925	407	32.4928	1.80324	0.554556	0.252436	NA	NA	NA
20795	7445303	1517	112.941	785	62.6705	1.80215	0.554894	0.229284	extracellular region	Defense-related protein containing SCP domain	NA
20743	7446791	1014	75.4928	525	41.9134	1.80116	0.555197	0.243365	diacylglycerol pyrophosphate phosphatase activity	CREB binding protein/P300 and related TAZ Zn-finger proteins	In phosphorous-containing anhydrides.
24201	7445921	683	50.8497	354	28.2616	1.79925	0.555787	0.263716	NA	Uncharacterized conserved protein	NA
21653	7441768	54	4.02033	28	2.23538	1.7985	0.55602	0.783175	glucan 1,4-alpha-glucosidase activity	von Willebrand factor and related coagulation proteins	Glucan 1,4-alpha-glucosidase.
31609	7449050	27	2.01016	14	1.11769	1.7985	0.55602	0.969139	DNA binding	DNA replication licensing factor, MCM5 component	Adenosinetriphosphatase.
1210	7445637	27	2.01016	14	1.11769	1.7985	0.55602	0.969139	NA	NA	NA
22336	7448838	2115	157.463	1097	87.579	1.79795	0.556189	0.225954	protein folding	Nucleolar GTPase/ATPase p130	NA
1252	7449115	366	27.2489	190	15.1687	1.79639	0.556671	0.319745	NA	NA	NA
22332	7448830	886	65.9631	460	36.7241	1.79618	0.556737	0.253845	proteolysis and peptidolysis	NA	NA
11907	7449417	25	1.86126	13	1.03786	1.79337	0.557608	0.98074	NA	NA	NA
33701	7453343	25	1.86126	13	1.03786	1.79337	0.557608	0.98074	NA	NA	NA
17582	7453128	25	1.86126	13	1.03786	1.79337	0.557608	0.98074	catalytic activity	Predicted sugar phosphatase (HAD superfamily)	4-nitrophenylphosphatase.
16656	7448781	98	7.29615	51	4.07159	1.79197	0.558046	0.593694	hydrolase activity	NA	NA
20564	7451519	1360	101.253	708	56.5232	1.79135	0.558239	0.243229	NA	NA	NA
38121	7442178	1455	108.325	758	60.5149	1.79006	0.55864	0.242584	ATP binding	Chaperone HSP104 and related ATP-dependent Clp proteases	NA
5098	7451737	23	1.71236	12	0.95802	1.7874	0.559473	0.993105	integral to membrane	NA	NA
11478	7443338	23	1.71236	12	0.95802	1.7874	0.559473	0.993105	rhodopsin-like receptor activity	NA	NA
2314	7446501	23	1.71236	12	0.95802	1.7874	0.559473	0.993105	NA	NA	NA
5439	7450073	182	13.55	95	7.58433	1.78658	0.559729	0.439652	NA	Nucleolar GTPase/ATPase p130	NA
7213	7450719	132	9.82746	69	5.50862	1.78402	0.560533	0.516906	NA	Nucleolar GTPase/ATPase p130	NA
25382	7444781	434	32.3115	227	18.1225	1.78295	0.56087	0.316883	NA	Fucosyltransferase	NA
30862	7446807	65	4.83928	34	2.71439	1.78282	0.560908	0.733915	nucleic acid binding	E3 ubiquitin ligase interacting with arginine methyltransferase	NA
24818	7451219	8194	610.047	4288	342.333	1.78203	0.561157	0.227957	NA	von Willebrand factor and related coagulation proteins	NA
8559	7450762	42	3.12692	22	1.75637	1.78033	0.561693	0.873353	NA	NA	NA
5768	7444905	21	1.56346	11	0.878185	1.78033	0.561693	1	NA	Histone acetyltransferase SAGA/ADA, catalytic subunit PCAF/GCN5 and related proteins	NA
4767	7451955	21	1.56346	11	0.878185	1.78033	0.561693	1	NA	NA	NA
262819	7443599	21	1.56346	11	0.878185	1.78033	0.561693	1	NA	Translocase of outer mitochondrial membrane complex, subunit TOM70/TOM72	NA
24877	7451260	21	1.56346	11	0.878185	1.78033	0.561693	1	NA	Heterochromatin-associated protein HP1 and related CHROMO domain proteins	NA
24684	7446958	2704	201.314	1417	113.126	1.77955	0.561939	0.240637	NA	Serine/threonine protein kinase	NA
37740	7444312	40	2.97802	21	1.67654	1.77629	0.56297	0.88821	multidrug transport	Uncharacterized membrane protein, predicted efflux pump	NA
7004	7444138	40	2.97802	21	1.67654	1.77629	0.56297	0.88821	NA	NA	NA
41650	7452380	316	23.5264	166	13.2526	1.77522	0.563309	0.360452	electron transport	Glucose dehydrogenase/choline dehydrogenase/mandelonitrile lyase (GMC oxidoreductase family)	Choline dehydrogenase.
1456	7445278	59	4.39258	31	2.47489	1.77486	0.563424	0.771221	isocitrate dehydrogenase (NADP+) activity	NA	NA
7102	7450664	331	24.6431	174	13.8913	1.774	0.563699	0.356156	NA	NA	NA
21683	7444708	11207	834.367	5897	470.787	1.77228	0.564245	0.234593	peroxidase activity	Fibrillins and related proteins containing Ca2+-binding EGF-like domains	NA
25671	7447776	57	4.24368	30	2.39505	1.77185	0.564381	0.783921	magnesium ion binding	NA	NA
7842	7444978	57	4.24368	30	2.39505	1.77185	0.564381	0.783921	transcription factor activity	NA	NA
36091	7453055	19	1.41456	10	0.79835	1.77185	0.564381	1	NA	NA	NA
10635	7444203	19	1.41456	10	0.79835	1.77185	0.564381	1	NA	Uncharacterized Fe-S protein	NA
36275	7453041	19	1.41456	10	0.79835	1.77185	0.564381	1	histone acetyltransferase activity	Histone acetyltransferase (MYST family)	Histone acetyltransferase.
25075	7450309	95	7.0728	50	3.99175	1.77185	0.564381	0.622664	exo-alpha-sialidase activity	Chitinase	Exo-alpha-sialidase.
264013	7445775	38	2.82912	20	1.5967	1.77185	0.564381	0.903838	1,2-diacylglycerol 3-beta-galactosyltransferase activity	NA	1,2-diacylglycerol 3-beta-galactosyltransferase.
25037	7450268	433	32.2371	228	18.2024	1.77104	0.564641	0.33066	NA	NA	NA
6211	7445958	357	26.5788	188	15.009	1.77086	0.564697	0.350878	regulation of cell cycle	G2/Mitotic-specific cyclin A	NA
22631	7449718	391	29.1101	206	16.446	1.77004	0.564958	0.341976	NA	NA	NA
9500	7446943	167	12.4332	88	7.02548	1.76973	0.565057	0.476497	NA	NA	NA
16507	7447646	510	37.9698	269	21.4756	1.76804	0.565598	0.319476	catalytic activity	Predicted hydrolase/acyltransferase (alpha/beta hydrolase superfamily)	NA
25387	7443008	4565	339.866	2409	192.323	1.76717	0.565877	0.247448	NA	DNA topoisomerase I	NA
38449	7447748	932	69.3879	492	39.2788	1.76655	0.566076	0.282349	glutathione transferase activity	NA	Glutathione transferase.
3078	7452785	174	12.9544	92	7.34482	1.76374	0.566976	0.474376	membrane	AAA ATPase containing von Willebrand factor type A (vWA) domain	NA
20996	7449064	1642	122.248	869	69.3766	1.76209	0.567509	0.268089	NA	Nuclear receptor coregulator SMRT/SMRTER, contains Myb-like domains	NA
22372	7451905	34	2.53132	18	1.43703	1.76149	0.567701	0.93768	DNA binding	Nucleosome-binding factor SPN, POB3 subunit	NA
1526	7443103	34	2.53132	18	1.43703	1.76149	0.567701	0.93768	NA	Phosphatidylinositol transfer protein SEC14 and related proteins	NA
34975	7451136	17	1.26566	9	0.718515	1.76149	0.567701	1	DNA binding	DNA replication licensing factor, MCM3 component	Adenosinetriphosphatase.
23645	7450625	117	8.71071	62	4.94977	1.75982	0.56824	0.574767	calcium ion binding	Nuclear receptor coregulator SMRT/SMRTER, contains Myb-like domains	Histone acetyltransferase.
261844	7451265	83	6.17939	44	3.51274	1.75914	0.568461	0.675194	catalytic activity	Phospholipase D1	Phospholipase D.
21020	7449089	1118	83.2356	593	47.3422	1.75817	0.568773	0.284509	NA	NA	NA
24806	7451212	1996	148.603	1059	84.5453	1.75768	0.568933	0.268495	NA	Nucleolar GTPase/ATPase p130	NA
261744	7441709	49	3.64807	26	2.07571	1.75751	0.568988	0.840452	ATP binding	Adenylate kinase	Adenylate kinase.
9261	7448035	966	71.9192	513	40.9554	1.75604	0.569464	0.293475	NA	Predicted phosphoglycerate mutase	NA
24862	7451250	1365	101.625	725	57.8804	1.75577	0.569549	0.280092	NA	NA	NA
37124	7447879	32	2.38242	17	1.3572	1.7554	0.569672	0.954479	signal transducer activity	G-protein beta subunit	NA
5971	7451148	367	27.3233	195	15.5678	1.75512	0.569763	0.365556	NA	NA	NA
22850	7448194	1027	76.4607	546	43.5899	1.75409	0.570096	0.293113	NA	NA	NA
25713	7442821	1606	119.567	854	68.1791	1.75373	0.570214	0.277571	NA	NA	NA
2711	7443094	1036	77.1307	551	43.9891	1.75341	0.570319	0.293577	NA	NA	NA
21581	7442423	47	3.49917	25	1.99588	1.7532	0.570385	0.856215	DNA binding	von Willebrand factor and related coagulation proteins	NA
5336	7449620	216	16.0813	115	9.18103	1.75158	0.570913	0.446364	NA	Uncharacterized conserved protein	NA
5961	7448413	15	1.11676	8	0.63868	1.74854	0.571906	1	NA	NA	NA
263495	7449276	15	1.11676	8	0.63868	1.74854	0.571906	1	3'-5'-exoribonuclease activity	Predicted RNA-binding polyribonucleotide nucleotidyltransferase	Polyribonucleotide nucleotidyltransferase.
9695	7450824	15	1.11676	8	0.63868	1.74854	0.571906	1	NA	Predicted phospholipase	NA
264461	7442131	15	1.11676	8	0.63868	1.74854	0.571906	1	trypsin activity	Trypsin	Trypsin.
21400	7443088	30	2.23351	16	1.27736	1.74854	0.571906	0.964738	NA	Chitinase	NA
32217	7450443	45	3.35027	24	1.91604	1.74854	0.571906	0.871006	RNA binding	Uncharacterized conserved protein	NA
24111	7451039	60	4.46703	32	2.55472	1.74854	0.571906	0.784624	catalytic activity	Predicted lipase	NA
20666	7449145	1513	112.644	807	64.4269	1.7484	0.571953	0.285999	NA	Predicted GTPase activator NB4S/EVI5 (contains TBC domain)/Calmodulin-binding protein Pollux (contains PTB and TBC domains)	NA
22877	7442259	2154	160.366	1149	91.7304	1.74824	0.572005	0.277186	serine-type endopeptidase inhibitor activity	NA	NA
22772	7453199	22699	1689.95	12114	967.121	1.7474	0.572277	0.260459	NA	RNA polymerase II transcription elongation factor DSIF/SUPT5H/SPT5	NA
20595	7445270	24768	1843.99	13228	1056.06	1.74611	0.572702	0.261825	NA	Choline transporter-like protein	NA
24602	7452982	219	16.3047	117	9.3407	1.74555	0.572885	0.451021	NA	NA	NA
21925	7449564	146	10.8698	78	6.22713	1.74555	0.572885	0.533854	NA	Flavonol reductase/cinnamoyl-CoA reductase	NA
25722	7442830	277	20.6228	148	11.8156	1.74539	0.572938	0.413216	nucleic acid binding	Lysosomal trafficking regulator LYST and related BEACH and WD40 repeat proteins	NA
1502	7445151	217	16.1558	116	9.26086	1.74452	0.573224	0.453854	NA	E3 ubiquitin-protein ligase/Putative upstream regulatory element binding protein	NA
10006	7451603	43	3.20137	23	1.83621	1.74347	0.573568	0.88519	cysteine-type endopeptidase activity	Ubiquitin C-terminal hydrolase	Ubiquitin thiolesterase.
28825	7446358	9375	697.973	5018	400.612	1.74227	0.573965	0.269412	transferase activity, transferring hexosyl groups	Chitin synthase/hyaluronan synthase (glycosyltransferases)	Chitin synthase.
16184	7452005	170	12.6566	91	7.26499	1.74213	0.574008	0.503405	binding	Mitochondrial carrier protein MRS3/4	NA
8019	7443545	282	20.995	151	12.0551	1.74159	0.574187	0.415273	S-adenosylmethionine-dependent methyltransferase activity	NA	NA
25243	7444196	155	11.5398	83	6.62631	1.74152	0.574212	0.524512	NA	Chitinase	NA
6288	7442391	28	2.08461	15	1.19753	1.74077	0.574459	0.975614	NA	NA	NA
38574	7443680	1217	90.6062	652	52.0524	1.74067	0.57449	0.302957	protein folding	Molecular chaperone (DnaJ superfamily)	NA
2790	7452312	209	15.5602	112	8.94152	1.74021	0.574642	0.465629	3-deoxy-7-phosphoheptulonate synthase activity	NA	NA
21460	7452318	291	21.6651	156	12.4543	1.73957	0.574854	0.413268	cysteine-type endopeptidase activity	Ubiquitin carboxyl-terminal hydrolase	Ubiquitin thiolesterase.
20865	7445159	470	34.9917	252	20.1184	1.73929	0.574948	0.360014	NA	Vacuolar protein sorting-associated protein	NA
10907	7444283	82	6.10494	44	3.51274	1.73794	0.575393	0.698136	calcium ion binding	NA	NA
10254	7443966	54	4.02033	29	2.31522	1.73648	0.575877	0.824629	NA	Phytoene desaturase	NA
24243	7449332	242	18.017	130	10.3786	1.73599	0.576042	0.445624	ATP binding	Nucleolar GTPase/ATPase p130	NA
6750	7448953	914	68.0477	491	39.199	1.73596	0.576051	0.320795	NA	NA	NA
42412	7452692	132	9.82746	71	5.66829	1.73376	0.57678	0.571471	DNA binding	RNA polymerase I and III, subunit RPA40/RPC40	DNA-directed RNA polymerase.
10885	7444272	171	12.731	92	7.34482	1.73333	0.576923	0.512397	NA	Gamma-glutamyltransferase	NA
34511	7451792	1403	104.454	755	60.2754	1.73295	0.577052	0.307814	catalytic activity	Enoyl-CoA hydratase	Enoyl-CoA hydratase.
269194	7450628	13	0.967856	7	0.558845	1.73189	0.577405	1	transcription factor activity	Heat shock transcription factor	NA
31661	7445527	13	0.967856	7	0.558845	1.73189	0.577405	1	hydrolase activity, hydrolyzing O-glycosyl compounds	NA	Galactinol--sucrose galactosyltransferase.
23967	7449321	13	0.967856	7	0.558845	1.73189	0.577405	1	NA	Predicted transporter/transmembrane protein	NA
19895	7450895	13	0.967856	7	0.558845	1.73189	0.577405	1	protein binding	Uncharacterized conserved protein, contains BTB/POZ domain	NA
6533	7446339	13	0.967856	7	0.558845	1.73189	0.577405	1	catalytic activity	Major facilitator superfamily permease - Cdc91p	NA
25030	7443944	13	0.967856	7	0.558845	1.73189	0.577405	1	NA	Chitinase	NA
262348	7451412	13	0.967856	7	0.558845	1.73189	0.577405	1	DNA binding	NA	NA
6357	7442726	13	0.967856	7	0.558845	1.73189	0.577405	1	triacylglycerol lipase activity	Predicted lipase	NA
9555	7450414	13	0.967856	7	0.558845	1.73189	0.577405	1	NA	Ultrahigh sulfur keratin-associated protein	NA
37862	7444178	13	0.967856	7	0.558845	1.73189	0.577405	1	protein kinase activity	Dual-specificity tyrosine-phosphorylation regulated kinase	NA
37609	7441863	39	2.90357	21	1.67654	1.73189	0.577405	0.915741	protein kinase activity	cAMP-dependent protein kinase catalytic subunit (PKA)	NA
32366	7442188	52	3.87143	28	2.23538	1.73189	0.577405	0.839124	RNA binding	Translational repressor Pumilio/PUF3 and related RNA-binding proteins (Puf superfamily)	NA
38672	7448236	26	1.93571	14	1.11769	1.73189	0.577405	0.987168	GTP binding	GTP-binding protein SEC4, small G protein superfamily, and related Ras family GTP-binding proteins	NA
2087	7442186	89	6.62609	48	3.83208	1.72911	0.578332	0.682293	NA	NA	NA
263375	7445567	1216	90.5318	656	52.3718	1.72864	0.57849	0.318087	DNA binding	NA	NA
10850	7444251	1136	84.5758	613	48.9389	1.72819	0.578639	0.32118	catalytic activity	C-4 sterol methyl oxidase	NA
22635	7451779	63	4.69038	34	2.71439	1.72797	0.578714	0.785288	NA	Ribosome biogenesis protein - Nop58p/Nop5p	NA
11654	7447794	326	24.2709	176	14.051	1.72735	0.578923	0.413384	NA	NA	NA
7917	7443498	737	54.87	398	31.7743	1.72687	0.579084	0.343225	NA	Predicted haloacid dehalogenase-like hydrolase	NA
24448	7445792	37	2.75467	20	1.5967	1.72523	0.579634	0.932219	NA	NA	NA
269764	7452674	37	2.75467	20	1.5967	1.72523	0.579634	0.932219	RNA binding	RNA pseudouridylate synthases	tRNA-pseudouridine synthase I.
263191	7444135	37	2.75467	20	1.5967	1.72523	0.579634	0.932219	NA	Guanine nucleotide exchange factor	NA
20804	7445028	6310	469.783	3413	272.477	1.72412	0.580006	0.294091	NA	NA	NA
7141	7447125	61	4.54148	33	2.63456	1.72381	0.580109	0.797662	intracellular signaling cascade	Uncharacterized conserved protein	NA
2660	7443068	24	1.78681	13	1.03786	1.72164	0.580842	0.999378	NA	NA	NA
262361	7446713	48	3.57362	26	2.07571	1.72164	0.580842	0.868847	NA	NA	NA
22648	7451794	227	16.9003	123	9.81971	1.72106	0.581039	0.474185	NA	Nucleolar GTPase/ATPase p130	NA
23496	7444157	1053	78.3964	571	45.5858	1.71975	0.581478	0.334787	peroxidase activity	beta-1,6-N-acetylglucosaminyltransferase, contains WSC domain	NA
23814	7452855	6299	468.964	3422	273.195	1.71659	0.582551	0.303956	NA	Basement membrane-specific heparan sulfate proteoglycan (HSPG) core protein	NA
5094	7451735	322	23.9731	175	13.9711	1.7159	0.582785	0.429592	NA	NA	NA
3054	7442419	23	1.71236	0	0	>=1.712361275	0	0.186218	NA	Cobalamin synthesis protein	NA
22742	7453175	380	28.2912	207	16.5258	1.71194	0.584134	0.415078	NA	NA	NA
2375	7450231	257	19.1338	140	11.1769	1.7119	0.584145	0.465811	NA	NA	NA
22167	7452613	22	1.63791	12	0.95802	1.70968	0.584904	1	hydrolase activity	NA	NA
264431	7453137	99	7.3706	54	4.31109	1.70968	0.584904	0.671606	integral to membrane	Steroid reductase	3-oxo-5-alpha-steroid 4-dehydrogenase.
3454	7448754	33	2.45687	18	1.43703	1.70968	0.584904	0.960756	NA	NA	NA
262597	7445194	33	2.45687	18	1.43703	1.70968	0.584904	0.960756	NA	NA	NA
14638	7442707	33	2.45687	18	1.43703	1.70968	0.584904	0.960756	protein kinase activity	Casein kinase (serine/threonine/tyrosine protein kinase)	NA
2941	7452910	33	2.45687	18	1.43703	1.70968	0.584904	0.960756	NA	von Willebrand factor and related coagulation proteins	NA
260900	7451427	11	0.818955	6	0.47901	1.70968	0.584904	1	glutamate-tRNA ligase activity	Glutaminyl-tRNA synthetase	Glutamine--tRNA ligase.
20605	7452525	11	0.818955	6	0.47901	1.70968	0.584904	1	double-stranded RNA binding	DEAD-box like helicase	In phosphorous-containing anhydrides.
12197	7451982	11	0.818955	6	0.47901	1.70968	0.584904	1	NA	RNA polymerase II, large subunit	NA
23418	7449008	11	0.818955	6	0.47901	1.70968	0.584904	1	NA	NA	NA
4740	7451942	11	0.818955	6	0.47901	1.70968	0.584904	1	transcription factor activity	Heat shock transcription factor	NA
9771	7450862	11	0.818955	6	0.47901	1.70968	0.584904	1	NA	DNA topoisomerase I	NA
34442	7445181	11	0.818955	6	0.47901	1.70968	0.584904	1	cAMP-dependent protein kinase complex	cGMP-dependent protein kinase	Protein kinase.
263511	7449307	11	0.818955	6	0.47901	1.70968	0.584904	1	endonuclease activity	Predicted endonuclease	NA
35095	7448591	11	0.818955	6	0.47901	1.70968	0.584904	1	NA	Anaphase-promoting complex (APC), Cdc23 subunit	NA
25797	7448245	11	0.818955	6	0.47901	1.70968	0.584904	1	exo-alpha-sialidase activity	Chitinase	Exo-alpha-sialidase.
261541	7452352	53	3.94588	29	2.31522	1.70432	0.586743	0.852461	nucleic acid binding	RNA-binding protein ETR-3 (RRM superfamily)	NA
269952	7444783	689	51.2964	377	30.0978	1.70432	0.586743	0.374944	molecular function unknown	Multitransmembrane protein	NA
21357	7446648	1182	88.0005	647	51.6533	1.70368	0.586966	0.350758	NA	NA	NA
6476	7442782	263	19.5805	144	11.4962	1.70321	0.587128	0.473273	NA	Endoplasmic reticulum protein EP58, contains filamin rod domain and KDEL motif	NA
4293	7452625	175	13.0288	96	7.66416	1.69997	0.588246	0.547601	NA	Putative transcription factor HALR/MLL3, involved in embryonic development	NA
23682	7452423	102	7.59395	56	4.47076	1.69858	0.588727	0.674903	NA	NA	NA
3424	7448739	182	13.55	100	7.9835	1.69725	0.589189	0.54317	NA	Replication factor C, subunit RFC5	NA
8215	7446983	60	4.46703	33	2.63456	1.69555	0.589778	0.823295	transcription factor activity	SWI-SNF chromatin-remodeling complex protein	NA
270246	7448843	20	1.48901	11	0.878185	1.69555	0.589778	1	NA	NA	NA
37928	7453083	20	1.48901	11	0.878185	1.69555	0.589778	1	nucleic acid binding	Histone acetyltransferase (MYST family)	Histone acetyltransferase.
20683	7453448	20	1.48901	11	0.878185	1.69555	0.589778	1	N-acetyltransferase activity	NA	NA
30851	7443165	20	1.48901	11	0.878185	1.69555	0.589778	1	ATP binding	Chaperone HSP104 and related ATP-dependent Clp proteases	Endopeptidase Clp.
6400	7442745	20	1.48901	11	0.878185	1.69555	0.589778	1	NA	NA	NA
1979	7445103	20	1.48901	11	0.878185	1.69555	0.589778	1	NA	NA	NA
24129	7451062	423	31.4926	233	18.6016	1.69301	0.590665	0.429036	NA	NA	NA
21726	7448718	2774	206.526	1529	122.068	1.69189	0.591054	0.345331	NA	NA	NA
22804	7448146	1045	77.8008	576	45.985	1.69187	0.591061	0.37047	oxidoreductase activity	Delta 6-fatty acid desaturase/delta-8 sphingolipid desaturase	With oxidation of a pair of donors resulting in the reduction
8518	7450742	87	6.47719	48	3.83208	1.69025	0.591627	0.726049	protein binding	Chromatin-associated protein Dek and related proteins, contains SAP DNA binding domain	NA
262517	7450055	87	6.47719	48	3.83208	1.69025	0.591627	0.726049	metabolism	Chitinase	Chitinase.
5944	7451133	58	4.31813	32	2.55472	1.69025	0.591627	0.836764	NA	NA	NA
24174	7451108	487	36.2574	269	21.4756	1.6883	0.59231	0.422351	NA	Chitinase	NA
260762	7445682	487	36.2574	269	21.4756	1.6883	0.59231	0.422351	cell adhesion	NA	NA
21797	7451693	38	2.82912	21	1.67654	1.68748	0.5926	0.943714	NA	Predicted E3 ubiquitin ligase	NA
32693	7441929	38	2.82912	21	1.67654	1.68748	0.5926	0.943714	NA	ATP-dependent RNA helicase pitchoune	NA
9257	7443206	76	5.65824	42	3.35307	1.68748	0.5926	0.765662	NA	Nuclear receptor coregulator SMRT/SMRTER, contains Myb-like domains	NA
25417	7450887	112	8.33845	62	4.94977	1.68461	0.593608	0.665722	nucleic acid binding	Uncharacterized conserved protein	NA
6752	7448954	56	4.16923	31	2.47489	1.68461	0.593608	0.850791	NA	NA	NA
11487	7448512	130	9.67856	72	5.74812	1.68378	0.593902	0.631391	NA	NA	NA
4362	7453330	573	42.6601	318	25.3875	1.68036	0.595111	0.420194	nucleic acid binding	NA	NA
7282	7450598	27	2.01016	15	1.19753	1.6786	0.595735	0.993332	calcium ion binding	NA	NA
262312	7451367	18	1.34011	10	0.79835	1.6786	0.595735	1	metabolism	Predicted L-carnitine dehydratase/alpha-methylacyl-CoA racemase	Alpha-methylacyl-CoA racemase.
11054	7450912	9	0.670054	5	0.399175	1.6786	0.595735	1	NA	NA	NA
264034	7447846	18	1.34011	10	0.79835	1.6786	0.595735	1	protein serine/threonine phosphatase activity	Serine/threonine protein phosphatase	Serine/threonine specific protein phosphatase.
17310	7452414	18	1.34011	10	0.79835	1.6786	0.595735	1	catalytic activity	NA	NA
2353	7450219	18	1.34011	10	0.79835	1.6786	0.595735	1	NA	NA	NA
40991	7448601	18	1.34011	10	0.79835	1.6786	0.595735	1	catalytic activity	NEDD8-activating complex, APP-BP1/UBA5 component	Ubiquitin--protein ligase.
263953	7450810	18	1.34011	10	0.79835	1.6786	0.595735	1	intracellular signaling cascade	Natriuretic peptide receptor, guanylate cyclase	NA
21681	7444704	18	1.34011	10	0.79835	1.6786	0.595735	1	DNA binding	NA	NA
4578	7448819	9	0.670054	5	0.399175	1.6786	0.595735	1	NA	NA	NA
17865	7447466	9	0.670054	5	0.399175	1.6786	0.595735	1	heme oxygenase (decyclizing) activity	Heme oxygenase	Heme oxygenase (decyclizing).
6842	7449183	9	0.670054	5	0.399175	1.6786	0.595735	1	NA	Predicted membrane protein	NA
263010	7444591	9	0.670054	5	0.399175	1.6786	0.595735	1	DNA binding	DNA-binding subunit of a DNA-dependent protein kinase (Ku70 autoantigen)	NA
7048	7444158	9	0.670054	5	0.399175	1.6786	0.595735	1	NA	NA	NA
262031	7446745	9	0.670054	5	0.399175	1.6786	0.595735	1	actin binding	Rho GTPase effector BNI1 and related formins	NA
5858	7446392	9	0.670054	5	0.399175	1.6786	0.595735	1	zinc ion binding	von Willebrand factor and related coagulation proteins	NA
262697	7451126	9	0.670054	5	0.399175	1.6786	0.595735	1	NA	Sister chromatid cohesion complex Cohesin, subunit PDS5	NA
34418	7449586	9	0.670054	5	0.399175	1.6786	0.595735	1	NA	Phytochelatin synthase	NA
24711	7447869	36533	2719.9	20297	1620.41	1.67852	0.595761	0.347397	nucleosome	NA	NA
25353	7444258	1051	78.2475	584	46.6236	1.67828	0.595849	0.388197	NA	NA	NA
10096	7444307	304	22.6329	169	13.4921	1.67749	0.596127	0.486583	NA	NA	NA
6043	7448578	678	50.4774	377	30.0978	1.67711	0.596262	0.413093	NA	Uncharacterized membrane protein	NA
10608	7444188	406	30.2269	226	18.0427	1.6753	0.596909	0.457015	NA	NA	NA
22218	7447919	3289	244.868	1831	146.178	1.67513	0.596967	0.364887	NA	NA	NA
5902	7451112	400	29.7802	223	17.8032	1.67274	0.59782	0.461964	NA	Myosin class II heavy chain	NA
25762	7443927	226	16.8258	126	10.0592	1.67268	0.597844	0.535671	NA	NA	NA
264188	7451263	52	3.87143	29	2.31522	1.67217	0.598027	0.877502	metalloendopeptidase activity	Predicted Zn2+-dependent endopeptidase, insulinase superfamily	NA
4858	7451375	783	58.2947	437	34.8879	1.67092	0.598474	0.4133	NA	NA	NA
21085	7449100	5249	390.791	2931	233.996	1.67007	0.598777	0.367106	DNA-directed RNA polymerase activity	von Willebrand factor and related coagulation proteins	DNA-directed RNA polymerase.
35206	7446330	345	25.6854	193	15.4082	1.667	0.59988	0.485411	NA	FOG: Leucine rich repeat	NA
12100	7442682	75	5.58379	42	3.35307	1.66528	0.600501	0.787598	DNA-directed DNA polymerase activity	Nucleolar GTPase/ATPase p130	DNA-directed DNA polymerase.
10249	7450288	191	14.22	107	8.54235	1.66465	0.600726	0.574851	NA	NA	NA
1051	7442873	66	4.91373	37	2.9539	1.66348	0.601151	0.822148	NA	NA	NA
4677	7443719	239	17.7937	134	10.6979	1.66329	0.601219	0.53917	protein kinase activity	Tyrosine kinase specific for activated (GTP-bound) p21cdc42Hs	NA
24722	7447883	387	28.8123	217	17.3242	1.66313	0.601277	0.478356	ubiquitin-protein ligase activity	Nucleolar GTPase/ATPase p130	NA
5153	7449698	57	4.24368	32	2.55472	1.66111	0.602006	0.863186	NA	NA	NA
24755	7451614	1879	139.892	1055	84.2259	1.66092	0.602076	0.394695	NA	NA	NA
8094	7453066	475	35.364	267	21.3159	1.65904	0.602759	0.464892	NA	Nucleolar GTPase/ATPase p130	NA
263111	7448986	313	23.303	176	14.051	1.65846	0.602968	0.508206	carbohydrate metabolism	Phosphoglucomutase/phosphomannomutase	Phosphomannomutase.
12085	7448903	16	1.19121	9	0.718515	1.65787	0.603182	1	NA	NA	NA
1725	7447641	16	1.19121	9	0.718515	1.65787	0.603182	1	NA	NA	NA
18190	7445555	16	1.19121	9	0.718515	1.65787	0.603182	1	oxidoreductase activity, acting on paired donors, with incorporation or reduction of molecular oxygen, 2-oxoglutarate as one donor, and incorporation of one atom each of oxygen into both donors	Prolyl 4-hydroxylase alpha subunit	Procollagen-proline,2-oxoglutarate-4-dioxygenase.
25662	7443398	915	68.1222	515	41.115	1.65687	0.603548	0.425584	NA	NA	NA
6483	7442785	87	6.47719	49	3.91192	1.65576	0.603952	0.759423	NA	NA	NA
35985	7452815	78	5.80714	44	3.51274	1.65316	0.6049	0.788101	microtubule motor activity	Dynein light chain type 1	Dynein ATPase.
261045	7443156	78	5.80714	44	3.51274	1.65316	0.6049	0.788101	phosphotransferase activity, alcohol group as acceptor	Protein kinase of the PI-3 kinase family involved in mitotic growth, DNA repair and meiotic recombination	NA
6635	7446586	521	38.7887	294	23.4715	1.65259	0.605112	0.466387	NA	NA	NA
24053	7450982	547	40.7244	309	24.669	1.65083	0.605755	0.465163	NA	NA	NA
3341	7444732	522	38.8632	295	23.5513	1.65015	0.606007	0.469682	NA	NA	NA
4006	7443832	253	18.836	143	11.4164	1.6499	0.606096	0.548573	NA	Glucose-6-phosphate/phosphate and phosphoenolpyruvate/phosphate antiporter	NA
1492	7445238	23	1.71236	13	1.03786	1.6499	0.606096	1	NA	NA	NA
31747	7450225	23	1.71236	13	1.03786	1.6499	0.606096	1	NA	Predicted pilin-like transcription factor	NA
270240	7451468	30	2.23351	17	1.3572	1.64568	0.60765	0.987804	NA	NA	NA
12859	7452622	30	2.23351	17	1.3572	1.64568	0.60765	0.987804	RNA binding	Exosomal 3'-5' exoribonuclease complex, subunit Rrp44/Dis3	Exoribonucleases producing 5'-phosphomonoesters.
1367	7445241	321	23.8986	182	14.53	1.64478	0.607984	0.5242	NA	Kinesin light chain	NA
13064	7443428	1716	127.757	973	77.6795	1.64467	0.608025	0.421321	glutamate-cysteine ligase activity	Gamma-glutamylcysteine synthetase	Glutamate--cysteine ligase.
25648	7448553	268	19.9527	152	12.1349	1.64424	0.608183	0.548145	NA	NA	NA
2270	7446487	342	25.4621	194	15.488	1.64399	0.608277	0.517916	NA	NA	NA
4862	7451379	37	2.75467	21	1.67654	1.64307	0.608616	0.962981	NA	IRF-2-binding protein CELTIX-1, contains BROMO domain	NA
3452	7448753	74	5.50934	42	3.35307	1.64307	0.608616	0.80976	NA	NA	NA
37596	7450314	153	11.3909	87	6.94565	1.64001	0.609753	0.647515	metabolism	Predicted guanosine polyphosphate pyrophosphohydrolase/synthase	NA
263006	7446322	174	12.9544	99	7.90367	1.63904	0.610115	0.624469	oxidoreductase activity, acting on paired donors, with incorporation or reduction of molecular oxygen, 2-oxoglutarate as one donor, and incorporation of one atom each of oxygen into both donors	Prolyl 4-hydroxylase alpha subunit	Procollagen-proline,2-oxoglutarate-4-dioxygenase.
16303	7446980	587	43.7024	334	26.6649	1.63895	0.610147	0.477068	protein kinase activity	Ca2+/calmodulin-dependent protein kinase, EF-Hand protein superfamily	NA
23143	7445983	432	32.1626	246	19.6394	1.63766	0.610629	0.503034	regulation of cell cycle	G2/Mitotic-specific cyclin A	NA
25076	7450310	158	11.7632	90	7.18515	1.63715	0.610817	0.644771	RNA binding	DEAH-box RNA helicase	NA
5233	7451795	86	6.40274	49	3.91192	1.63673	0.610975	0.779269	NA	Myosin class II heavy chain	NA
6290	7445999	1244	92.6164	709	56.603	1.63624	0.611155	0.443622	nucleoside-diphosphate kinase activity	Nucleoside diphosphate kinase	Nucleoside-diphosphate kinase.
7786	7444948	205	15.2624	117	9.3407	1.63396	0.612009	0.602396	NA	NA	NA
6589	7446365	7	0.521153	4	0.31934	1.63197	0.612756	1	NA	NA	NA
8262	7451037	7	0.521153	4	0.31934	1.63197	0.612756	1	NA	NA	NA
1122	7453446	7	0.521153	4	0.31934	1.63197	0.612756	1	NA	Predicted UDP-galactose transporter	NA
268368	7450415	7	0.521153	4	0.31934	1.63197	0.612756	1	transcription factor activity	Heat shock transcription factor	NA
1976	7445101	7	0.521153	4	0.31934	1.63197	0.612756	1	protein folding	Nucleolar GTPase/ATPase p130	NA
13982	7450617	7	0.521153	4	0.31934	1.63197	0.612756	1	ATP binding	ATP-dependent RNA helicase pitchoune	Adenosinetriphosphatase.
10062	7444291	7	0.521153	4	0.31934	1.63197	0.612756	1	NA	NA	NA
38475	7448488	7	0.521153	4	0.31934	1.63197	0.612756	1	ATP binding	mRNA splicing factor ATP-dependent RNA helicase	NA
2327	7450206	7	0.521153	4	0.31934	1.63197	0.612756	1	myosin ATPase activity	ER-Golgi vesicle-tethering protein p115	Myosin ATPase.
8044	7448063	7	0.521153	4	0.31934	1.63197	0.612756	1	NA	AFH1-interacting protein FIP2, contains BTB/POZ domain and pentapeptide repeats	NA
9701	7450828	7	0.521153	4	0.31934	1.63197	0.612756	1	NA	Proteins containing Ca2+-binding EGF-like domains	NA
34554	7450088	7	0.521153	4	0.31934	1.63197	0.612756	1	oxygen evolving complex	NA	NA
263734	7449340	7	0.521153	4	0.31934	1.63197	0.612756	1	NA	LRR-containing protein	NA
3292	7444705	7	0.521153	4	0.31934	1.63197	0.612756	1	NA	WD40 repeat protein	NA
23820	7449850	28	2.08461	16	1.27736	1.63197	0.612756	0.999183	metabolism	Dehydrogenases with different specificities (related to short-chain alcohol dehydrogenases)	Acting on the CH-OH group of donors.
38559	7442854	28	2.08461	16	1.27736	1.63197	0.612756	0.999183	protein kinase activity	Glycogen synthase kinase-3	NA
37592	7451877	28	2.08461	16	1.27736	1.63197	0.612756	0.999183	protein kinase activity	Ca2+/calmodulin-dependent protein kinase, EF-Hand protein superfamily	NA
3415	7448736	28	2.08461	16	1.27736	1.63197	0.612756	0.999183	NA	NA	NA
4547	7448799	168	12.5077	96	7.66416	1.63197	0.612756	0.639696	NA	NA	NA
17349	7445092	84	6.25384	48	3.83208	1.63197	0.612756	0.789041	NA	Prohibitin-like protein	NA
11743	7443701	14	1.04231	8	0.63868	1.63197	0.612756	1	cell adhesion	Vitronectin receptor, alpha subunit	NA
1316	7449170	14	1.04231	8	0.63868	1.63197	0.612756	1	NA	NA	NA
23442	7449216	14	1.04231	8	0.63868	1.63197	0.612756	1	NA	NA	NA
25309	7453090	14	1.04231	8	0.63868	1.63197	0.612756	1	NA	NA	NA
4202	7442095	49	3.64807	28	2.23538	1.63197	0.612756	0.914569	signal transducer activity	Chitinase	Exo-alpha-sialidase.
6204	7445955	42	3.12692	24	1.91604	1.63197	0.612756	0.949073	NA	NA	NA
2009	7445467	42	3.12692	24	1.91604	1.63197	0.612756	0.949073	NA	NA	NA
267987	7445656	2082	155.006	1191	95.0835	1.63021	0.613418	0.438773	catalytic activity	Cystathionine beta-synthase and related enzymes	NA
26398	7448016	185	13.7733	106	8.46251	1.62757	0.614412	0.628176	ubiquitin thiolesterase activity	Ubiquitin C-terminal hydrolase	Ubiquitinyl hydrolase 1.
12821	7445131	246	18.3148	141	11.2567	1.62701	0.614624	0.583743	structural molecule activity	Teneurin-1 and related extracellular matrix proteins, contain EGF-like repeats	NA
263343	7443456	265	19.7294	152	12.1349	1.62583	0.615069	0.575021	metabolism	NA	NA
24493	7445830	1825	135.872	1048	83.6671	1.62396	0.615778	0.451222	UDP-N-acetylmuramoylalanyl-D-glutamyl-2,6-diaminopimelate-D-alanyl-D-alanine ligase activity	SWI-SNF chromatin-remodeling complex protein	Acid--D-amino-acid ligases (peptide synthases).
22957	7442331	550	40.9478	316	25.2279	1.62312	0.616099	0.504448	NA	NA	NA
23376	7446206	315	23.4519	181	14.4501	1.62295	0.61616	0.557268	NA	Splicing coactivator SRm160/300, subunit SRm160 (contains PWI domain)	NA
263872	7445777	120	8.93406	69	5.50862	1.62183	0.616586	0.718758	molecular function unknown	CDK5 activator-binding protein	NA
22764	7453190	73	5.43489	42	3.35307	1.62087	0.616953	0.832153	histone acetyltransferase activity	Nuclear receptor coregulator SMRT/SMRTER, contains Myb-like domains	Histone acetyltransferase.
22565	7449650	7741	576.321	4455	355.665	1.6204	0.61713	0.438563	transporter activity	Permease of the major facilitator superfamily	NA
22070	7442033	542	40.3522	312	24.9085	1.62001	0.617278	0.510139	NA	NA	NA
3163	7441733	33	2.45687	19	1.51687	1.6197	0.617398	0.982795	NA	NA	NA
20674	7449168	33	2.45687	19	1.51687	1.6197	0.617398	0.982795	NA	Nuclear protein COP1	NA
6511	7446328	5239	390.046	3020	241.102	1.61777	0.618136	0.445333	proteolysis and peptidolysis	Serine/threonine protein kinase	NA
5852	7446386	111	8.264	64	5.10944	1.6174	0.618277	0.741009	NA	NA	NA
25867	7448906	1002	74.5994	578	46.1446	1.61664	0.618566	0.481176	NA	Similar to IMP-GMP specific 5'-nucleotidase	NA
6639	7446588	52	3.87143	30	2.39505	1.61643	0.618648	0.910972	NA	NA	NA
270334	7442402	338	25.1643	195	15.5678	1.61643	0.618648	0.558591	NA	NA	NA
16169	7448626	26	1.93571	15	1.19753	1.61643	0.618648	1	metabolism	Pyruvate dehydrogenase E1, alpha subunit	Pyruvate dehydrogenase (lipoamide).
2447	7444636	123	9.15741	71	5.66829	1.61555	0.618983	0.720642	NA	NA	NA
7134	7447122	1041	77.503	601	47.9808	1.61529	0.619084	0.481684	molecular function unknown	Predicted membrane protein	NA
5420	7450063	71	5.28598	41	3.27324	1.61491	0.619229	0.844002	NA	NA	NA
3632	7451280	424	31.567	245	19.5596	1.61389	0.619621	0.539561	NA	NA	NA
40966	7448581	372	27.6956	215	17.1645	1.61354	0.619757	0.552652	DNA binding	NA	NA
1798	7449067	218	16.2302	126	10.0592	1.61347	0.619783	0.620035	NA	GATA-4/5/6 transcription factors	NA
3590	7451720	147	10.9442	85	6.78598	1.61277	0.620051	0.687936	potassium channel activity	Tandem pore domain K+ channel	NA
33798	7448811	634	47.2016	367	29.2994	1.61101	0.62073	0.513002	protein kinase activity	cAMP-dependent protein kinase catalytic subunit (PKA)	NA
4568	7448812	57	4.24368	33	2.63456	1.61078	0.620819	0.895057	NA	Myosin class II heavy chain	NA
263946	7448030	19	1.41456	11	0.878185	1.61078	0.620819	1	kinase activity	Creatine kinases	Creatine kinase.
3987	7443823	228	16.9747	132	10.5382	1.61078	0.620819	0.616969	glycerol-3-phosphate dehydrogenase activity	Predicted FAD-dependent oxidoreductase	Glycerol-3-phosphate dehydrogenase.
5470	7450087	1022	76.0884	592	47.2623	1.60992	0.62115	0.490523	NA	5'-AMP-activated protein kinase, gamma subunit	NA
40675	7451777	692	51.5197	401	32.0138	1.6093	0.62139	0.510257	catalytic activity	UDP-glucose 4-epimerase/UDP-sulfoquinovose synthase	UDP-glucose 4-epimerase.
4445	7453373	257	19.1338	149	11.8954	1.6085	0.621697	0.603252	NA	NA	NA
7846	7451026	607	45.1914	352	28.1019	1.60813	0.621842	0.520246	transporter activity	Glutamate-gated AMPA-type ion channel receptor subunit GluR2 and related subunits	NA
9498	7447830	543	40.4266	315	25.148	1.60755	0.622066	0.528867	NA	NA	NA
7110	7447111	986	73.4082	572	45.6656	1.60752	0.622078	0.495596	NA	NA	NA
23704	7450113	212	15.7835	123	9.81971	1.60733	0.62215	0.632575	NA	Beta, beta-carotene 15,15'-dioxygenase and related enzymes	NA
8503	7450733	31	2.30797	18	1.43703	1.60607	0.622639	0.993547	NA	Uncharacterized conserved protein	NA
24153	7445868	43	3.20137	25	1.99588	1.60399	0.623444	0.956285	metabolism	NA	NA
24165	7445877	557	41.4689	324	25.8665	1.60319	0.623757	0.533679	glucan 1,4-alpha-glucosidase activity	Chitinase	Glucan 1,4-alpha-glucosidase.
2996	7452935	361	26.8766	210	16.7654	1.60311	0.623789	0.570964	NA	NA	NA
2333	7446509	1129	84.0546	657	52.4516	1.60252	0.624018	0.498014	nucleic acid binding	Heterochromatin-associated protein HP1 and related CHROMO domain proteins	NA
7628	7452825	213	15.858	124	9.89954	1.60189	0.624263	0.639036	NA	NA	NA
22252	7453371	438	32.6093	255	20.3579	1.6018	0.624298	0.554671	exo-alpha-sialidase activity	Chitinase	Exo-alpha-sialidase.
24515	7445848	182	13.55	106	8.46251	1.60118	0.62454	0.664444	NA	NA	NA
25891	7451998	115	8.56181	67	5.34895	1.60065	0.624745	0.752	triacylglycerol lipase activity	Nucleolar GTPase/ATPase p130	NA
268048	7445156	115	8.56181	67	5.34895	1.60065	0.624745	0.752	transporter activity	Predicted transporter	NA
23505	7447085	1148	85.4692	669	53.4096	1.60026	0.624899	0.500875	NA	NA	NA
269386	7449874	271	20.1761	158	12.6139	1.59951	0.625192	0.608959	trypsin activity	Trypsin	Serine endopeptidases.
4607	7448836	12	0.893406	7	0.558845	1.59866	0.625522	1	NA	NA	NA
20618	7445122	12	0.893406	7	0.558845	1.59866	0.625522	1	NA	Translation initiation factor 3, subunit a (eIF-3a)	NA
24003	7453047	12	0.893406	7	0.558845	1.59866	0.625522	1	transcription factor activity	Nucleolar GTPase/ATPase p130	NA
23865	7452359	12	0.893406	7	0.558845	1.59866	0.625522	1	NA	NA	NA
6232	7445970	12	0.893406	7	0.558845	1.59866	0.625522	1	NA	Myosin class II heavy chain	NA
262193	7448787	24	1.78681	14	1.11769	1.59866	0.625522	1	NA	Transcriptional regulator SNIP1, contains FHA domain	NA
11510	7443354	24	1.78681	14	1.11769	1.59866	0.625522	1	NA	NA	NA
7140	7450681	24	1.78681	14	1.11769	1.59866	0.625522	1	response to pest, pathogen or parasite	NA	NA
7868	7444989	60	4.46703	35	2.79423	1.59866	0.625522	0.892428	NA	Translation initiation factor 5B (eIF-5B)	NA
1080	7449107	72	5.36044	42	3.35307	1.59866	0.625522	0.854781	NA	Fibrillins and related proteins containing Ca2+-binding EGF-like domains	NA
8428	7445897	269	20.0272	157	12.5341	1.59782	0.625854	0.6123	NA	Beclin-like protein	NA
40391	7446146	7139	531.502	4171	332.992	1.59614	0.626511	0.477196	phosphopyruvate hydratase complex	Enolase	Phosphopyruvate hydratase.
2028	7447605	65	4.83928	38	3.03373	1.59516	0.626897	0.878751	UDP-N-acetylmuramoylalanyl-D-glutamyl-2,6-diaminopimelate-D-alanyl-D-alanine ligase activity	FOG: RCC1 domain	Acid--D-amino-acid ligases (peptide synthases).
21585	7452784	1563	116.366	914	72.9692	1.59473	0.627066	0.500006	membrane	Putative zinc transporter	NA
9558	7447858	41	3.05247	24	1.91604	1.59311	0.627702	0.964958	NA	RNA polymerase II, large subunit	NA
7716	7449856	41	3.05247	24	1.91604	1.59311	0.627702	0.964958	nucleic acid binding	Predicted E3 ubiquitin ligase	NA
5496	7450098	140	10.4231	82	6.54647	1.59217	0.628075	0.722208	NA	NA	NA
22513	7447232	29	2.15906	17	1.3572	1.59083	0.628603	1	NA	Nucleolar GTPase/ATPase p130	NA
28300	7449625	29	2.15906	17	1.3572	1.59083	0.628603	1	S-adenosylmethionine-dependent methyltransferase activity	Ribosomal RNA adenine dimethylase	Methyltransferases.
33941	7453334	29	2.15906	17	1.3572	1.59083	0.628603	1	binding	Mitochondrial solute carrier protein	NA
6962	7444114	29	2.15906	17	1.3572	1.59083	0.628603	1	NA	Translation initiation factor 4F, ribosome/mRNA-bridging subunit (eIF-4G)	NA
4404	7453350	261	19.4316	153	12.2148	1.59083	0.628603	0.626077	ubiquitin ligase complex	Predicted E3 ubiquitin ligase	NA
23275	7444587	191	14.22	112	8.94152	1.59034	0.628797	0.670686	pyrroline-5-carboxylate reductase activity	Pyrroline-5-carboxylate reductase	Pyrroline-5-carboxylate reductase.
25049	7443961	1519	113.09	891	71.133	1.58984	0.628993	0.508461	exo-alpha-sialidase activity	Sister chromatid cohesion complex Cohesin, subunit PDS5	Exo-alpha-sialidase.
263108	7448981	46	3.42472	27	2.15555	1.5888	0.629407	0.95332	NA	Myosin class II heavy chain	NA
21690	7444716	1499	111.601	880	70.2548	1.58852	0.629516	0.511032	NA	NA	NA
21414	7452282	3013	224.319	1769	141.228	1.58835	0.629585	0.497501	NA	Serine/threonine protein kinase	NA
4796	7451968	2655	197.666	1559	124.463	1.58815	0.629662	0.499635	NA	NA	NA
21362	7446653	814	60.6027	478	38.1611	1.58807	0.629694	0.534665	NA	NA	NA
264546	7444824	34	2.53132	20	1.5967	1.58534	0.630779	0.988372	NA	NA	NA
3876	7445375	17	1.26566	10	0.79835	1.58534	0.630779	1	protein modification	NA	NA
7462	7450114	17	1.26566	10	0.79835	1.58534	0.630779	1	NA	NA	NA
38662	7443887	17	1.26566	10	0.79835	1.58534	0.630779	1	tRNA ligase activity	WD40-repeat-containing subunit of the 18S rRNA processing complex	NA
33225	7452098	17	1.26566	10	0.79835	1.58534	0.630779	1	motor activity	Myosin class V heavy chain	NA
40089	7443787	17	1.26566	10	0.79835	1.58534	0.630779	1	molecular function unknown	Serine/threonine protein kinase	NA
267958	7453438	362	26.9511	213	17.0049	1.5849	0.630953	0.597545	peroxidase activity	Peroxidase/oxygenase	Peroxidase.
267933	7446795	1063	79.1409	626	49.9767	1.58355	0.631491	0.53028	protein kinase activity	Serine/threonine protein kinase	Phosphotransferases with an alcohol group as acceptor.
27836	7447910	292	21.7395	172	13.7316	1.58317	0.631643	0.623247	transferase activity, transferring hexosyl groups	Chitin synthase/hyaluronan synthase (glycosyltransferases)	Chitin synthase.
20952	7445530	387	28.8123	228	18.2024	1.58289	0.631756	0.594142	membrane	NA	NA
31951	7450241	682	50.7752	402	32.0937	1.58209	0.632073	0.553468	cation transport	Mitochondrial Fe2+ transporter MMT1 and related transporters (cation diffusion facilitator superfamily)	NA
9124	7447565	78	5.80714	46	3.67241	1.58129	0.632396	0.852049	NA	NA	NA
268788	7452244	780	58.0714	460	36.7241	1.58129	0.632396	0.54753	DNA binding	Zuotin and related molecular chaperones (DnaJ superfamily), contains DNA-binding domains	NA
6398	7442744	607	45.1914	358	28.5809	1.58117	0.632441	0.561907	NA	Armadillo repeat protein VAC8 required for vacuole fusion, inheritance and cytosol-to-vacuole protein targeting	NA
23338	7450642	961	71.5469	567	45.2665	1.58057	0.632682	0.539078	NA	Splicing coactivator SRm160/300, subunit SRm300	NA
36350	7451052	61	4.54148	36	2.87406	1.58016	0.632847	0.90162	proteolysis and peptidolysis	ATP-dependent Clp protease, proteolytic subunit	Endopeptidase Clp.
261971	7452746	371	27.6211	219	17.4839	1.57981	0.632989	0.602749	NA	Ankyrin	NA
24072	7450994	105	7.8173	62	4.94977	1.57933	0.633181	0.791714	histone acetyltransferase activity	Chitinase	Histone acetyltransferase.
21387	7443079	44	3.27582	26	2.07571	1.57817	0.633646	0.961589	metalloendopeptidase activity	Peptidase family M48	NA
260856	7445642	22	1.63791	13	1.03786	1.57817	0.633646	1	protein binding	Actin-related protein - Arp6p	NA
8980	7449378	22	1.63791	13	1.03786	1.57817	0.633646	1	NA	NA	NA
4207	7447448	22	1.63791	13	1.03786	1.57817	0.633646	1	NA	Growth factor receptor-bound proteins (GRB7, GRB10, GRB14)	NA
21452	7452461	2478	184.488	1465	116.958	1.57739	0.63396	0.518267	NA	NA	NA
30659	7442820	8404	625.682	4969	396.7	1.57722	0.634028	0.506573	hydroxyacylglutathione hydrolase activity	Glyoxylase	Hydroxyacylglutathione hydrolase.
23812	7449841	394	29.3335	233	18.6016	1.57694	0.634141	0.601436	NA	NA	NA
35103	7448567	49	3.64807	29	2.31522	1.5757	0.63464	0.948694	GTPase activity	Vacuolar sorting protein VPS1, dynamin, and related proteins	NA
22321	7446130	174	12.9544	103	8.22301	1.57538	0.634766	0.70491	NA	NA	NA
7669	7452844	1250	93.0631	740	59.0779	1.57526	0.634816	0.537995	NA	NA	NA
269400	7449260	704	52.4131	417	33.2912	1.57438	0.635169	0.563852	electron transport	Cytochrome P450 CYP11/CYP12/CYP24/CYP27 subfamilies	Thromboxane-A synthase.
24167	7451102	27	2.01016	16	1.27736	1.57369	0.635451	1	NA	NA	NA
33851	7442073	27	2.01016	16	1.27736	1.57369	0.635451	1	ubiquitin ligase complex	Predicted E3 ubiquitin ligase	NA
2050	7445068	27	2.01016	16	1.27736	1.57369	0.635451	1	phosphopantetheine binding	Chitinase	NA
24852	7451239	145	10.7953	86	6.86581	1.57233	0.635999	0.740055	NA	FOG: Low-complexity	NA
21220	7450193	1443	107.432	856	68.3388	1.57205	0.636112	0.53891	NA	LRR-containing protein	NA
10037	7441867	118	8.78516	70	5.58845	1.57202	0.636124	0.777263	NA	NA	NA
22522	7447243	477	35.5129	283	22.5933	1.57183	0.6362	0.593222	NA	NA	NA
10541	7453104	1286	95.7433	763	60.9141	1.57178	0.636223	0.542766	metabolism	Methylmalonate semialdehyde dehydrogenase	Methylmalonate-semialdehyde dehydrogenase (acylating).
260818	7451527	123	9.15741	73	5.82796	1.57129	0.63642	0.77058	calcium ion binding	Uncharacterized conserved protein, contains DM10 domain	NA
8355	7445858	1206	89.7873	716	57.1619	1.57076	0.636637	0.546492	NA	NA	NA
22794	7453222	485	36.1085	288	22.9925	1.57045	0.636761	0.594093	NA	Uncharacterized conserved protein, contains TBC domain	NA
2081	7442184	197	14.6667	117	9.3407	1.5702	0.636862	0.69246	damaged DNA binding	DNA repair protein RHP57	NA
21796	7441887	69	5.13708	41	3.27324	1.56942	0.637178	0.885507	NA	NA	NA
263399	7452810	792	58.9648	471	37.6023	1.56812	0.637708	0.567746	electron transport	Cytochrome P450 CYP4/CYP19/CYP26 subfamilies	Acting on paired donors, with incorporation or reduction of
21679	7444702	738	54.9445	439	35.0476	1.56771	0.637873	0.57194	electron transporter activity	Molecular chaperone (DnaJ superfamily)	NA
5601	7445185	1260	93.8076	751	59.9561	1.56461	0.639139	0.555119	NA	NA	NA
22820	7448162	3533	263.034	2107	168.212	1.5637	0.639509	0.536057	NA	Choline transporter-like protein	NA
6045	7448579	57	4.24368	34	2.71439	1.5634	0.639632	0.926328	NA	Transmembrane glycoprotein nicastrin	NA
263903	7445827	595	44.298	355	28.3414	1.56301	0.63979	0.591649	electron transporter activity	Thioredoxin	NA
2481	7444651	124	9.23186	74	5.90779	1.56266	0.639935	0.778417	potassium channel activity	K+-channel ERG and related proteins, contain PAS/PAC sensor domain	NA
7536	7450152	72	5.36044	43	3.43291	1.56149	0.640415	0.883474	NA	NA	NA
8028	7448055	82	6.10494	49	3.91192	1.5606	0.640779	0.860527	NA	NA	NA
2494	7450374	1029	76.6096	615	49.0985	1.56032	0.640893	0.569085	NA	UDP-galactose transporter related protein	NA
4294	7447495	87	6.47719	52	4.15142	1.56024	0.640929	0.848499	NA	NA	NA
10842	7442955	4351	323.934	2601	207.651	1.55999	0.641028	0.539913	NA	NA	NA
24231	7450755	480	35.7362	287	22.9126	1.55967	0.64116	0.611568	exo-alpha-sialidase activity	Nuclear receptor coregulator SMRT/SMRTER, contains Myb-like domains	Exo-alpha-sialidase.
9067	7445814	127	9.45521	76	6.06746	1.55835	0.641705	0.778961	nucleosome	Histone H4	NA
25806	7448254	1326	98.7214	794	63.389	1.55739	0.6421	0.565414	NA	Chitinase	NA
21927	7445337	671	49.9563	402	32.0937	1.55658	0.642435	0.594805	NA	NA	NA
268958	7442279	42726	3180.97	25598	2043.62	1.55654	0.64245	0.533199	NA	NA	NA
4725	7451933	5	0.372252	3	0.239505	1.55426	0.643394	1	NA	Na+/H+ antiporter	NA
17480	7444721	5	0.372252	3	0.239505	1.55426	0.643394	1	protein kinase activity	3-phosphoinositide-dependent protein kinase (PDK1)	NA
12014	7448279	5	0.372252	3	0.239505	1.55426	0.643394	1	NA	NA	NA
4654	7451897	5	0.372252	3	0.239505	1.55426	0.643394	1	NA	NA	NA
3409	7448732	5	0.372252	3	0.239505	1.55426	0.643394	1	NA	NA	NA
260754	7446787	5	0.372252	3	0.239505	1.55426	0.643394	1	3',5'-cyclic-nucleotide phosphodiesterase activity	Cyclic nucleotide phosphodiesterase	NA
24744	7450534	5	0.372252	3	0.239505	1.55426	0.643394	1	DNA repair	NA	NA
34447	7448136	5	0.372252	3	0.239505	1.55426	0.643394	1	nitrate reductase (NADH) activity	Cytochrome b5	NA
960	7445687	5	0.372252	3	0.239505	1.55426	0.643394	1	NA	NA	NA
264694	7448532	5	0.372252	3	0.239505	1.55426	0.643394	1	NA	NA	NA
8308	7447028	5	0.372252	3	0.239505	1.55426	0.643394	1	NA	Nucleolar GTPase/ATPase p130	NA
16287	7451143	5	0.372252	3	0.239505	1.55426	0.643394	1	protein kinase activity	Tyrosine kinase specific for activated (GTP-bound) p21cdc42Hs	NA
30149	7450261	5	0.372252	3	0.239505	1.55426	0.643394	1	NA	Predicted seven transmembrane receptor - rhodopsin family	NA
2592	7443032	5	0.372252	3	0.239505	1.55426	0.643394	1	NA	NA	NA
1455	7442919	5	0.372252	3	0.239505	1.55426	0.643394	1	NA	NA	NA
12130	7451992	5	0.372252	3	0.239505	1.55426	0.643394	1	NA	NA	NA
35896	7445592	20	1.48901	12	0.95802	1.55426	0.643394	1	translation initiation factor activity	Predicted translation initiation factor related to eIF-2B alpha/beta/delta subunits (CIG2/IDI2)	NA
9440	7453031	20	1.48901	12	0.95802	1.55426	0.643394	1	NA	Projectin/twitchin and related proteins	NA
22840	7448185	20	1.48901	12	0.95802	1.55426	0.643394	1	NA	NA	NA
22441	7451358	20	1.48901	12	0.95802	1.55426	0.643394	1	NA	NA	NA
8288	7451047	20	1.48901	12	0.95802	1.55426	0.643394	1	NA	NA	NA
7978	7449313	20	1.48901	12	0.95802	1.55426	0.643394	1	cation transport	Membrane protein HUEL (cation efflux superfamily)	NA
263859	7449366	15	1.11676	9	0.718515	1.55426	0.643394	1	metabolism	Chitinase	Chitinase.
261392	7444656	15	1.11676	9	0.718515	1.55426	0.643394	1	NA	Nitrogen permease regulator NLRG/NPR2	NA
34186	7449652	15	1.11676	9	0.718515	1.55426	0.643394	1	signal peptidase complex	Signal peptidase subunit	Acting on peptide bonds (peptide hydrolases).
7325	7443411	95	7.0728	57	4.5506	1.55426	0.643394	0.836663	NA	Myosin class II heavy chain	NA
264846	7443923	45	3.35027	27	2.15555	1.55426	0.643394	0.966726	cysteine-type endopeptidase activity	Cysteine proteinase Cathepsin L	Cathepsin H.
24023	7448090	800	59.5604	480	38.3208	1.55426	0.643394	0.589553	NA	NA	NA
30924	7449113	35	2.60577	21	1.67654	1.55426	0.643394	0.993749	inositol-3-phosphate synthase activity	Myo-inositol-1-phosphate synthase	Myo-inositol-1-phosphate synthase.
9543	7446967	70	5.21153	42	3.35307	1.55426	0.643394	0.893967	NA	NA	NA
21308	7450380	60	4.46703	36	2.87406	1.55426	0.643394	0.922692	ubiquitin ligase complex	FOG: Predicted E3 ubiquitin ligase	NA
5794	7442298	30	2.23351	18	1.43703	1.55426	0.643394	1	NA	NA	NA
23327	7446571	85	6.32829	51	4.07159	1.55426	0.643394	0.859105	NA	Endoplasmic reticulum protein EP58, contains filamin rod domain and KDEL motif	NA
8322	7447035	55	4.09478	33	2.63456	1.55426	0.643394	0.939446	NA	NA	NA
11598	7443400	25	1.86126	15	1.19753	1.55426	0.643394	1	NA	NA	NA
260975	7451532	10	0.744505	6	0.47901	1.55426	0.643394	1	NA	Predicted K+/H+-antiporter	NA
269151	7453310	10	0.744505	6	0.47901	1.55426	0.643394	1	NA	NA	NA
5584	7445175	10	0.744505	6	0.47901	1.55426	0.643394	1	oxidoreductase activity, acting on paired donors, with incorporation or reduction of molecular oxygen, 2-oxoglutarate as one donor, and incorporation of one atom each of oxygen into both donors	Prolyl 4-hydroxylase alpha subunit	With 2-oxoglutarate as one donor, and incorporation of one
9860	7452691	10	0.744505	6	0.47901	1.55426	0.643394	1	NA	NA	NA
2118	7442201	10	0.744505	6	0.47901	1.55426	0.643394	1	metalloendopeptidase activity	N-arginine dibasic convertase NRD1 and related Zn2+-dependent endopeptidases, insulinase superfamily	Insulysin.
268213	7446484	10	0.744505	6	0.47901	1.55426	0.643394	1	NA	NA	NA
6396	7442742	801	59.6348	481	38.4006	1.55296	0.64393	0.591584	NA	NA	NA
24900	7441809	2251	167.588	1352	107.937	1.55265	0.644061	0.561069	NA	NA	NA
22473	7451387	98	7.29615	59	4.71027	1.54899	0.645583	0.835948	nitrogen compound metabolism	Carbon-nitrogen hydrolase	Acting on carbon-nitrogen bonds, other than peptide bonds.
22192	7452642	7777	579.001	4683	373.867	1.54868	0.645711	0.55514	NA	Nuclear inhibitor of phosphatase-1	NA
261271	7446473	166	12.3588	100	7.9835	1.54804	0.645978	0.747932	phospholipid biosynthesis	Phosphatidylinositol synthase	CDP-diacylglycerol--inositol 3-phosphatidyltransferase.
23932	7443494	83	6.17939	50	3.99175	1.54804	0.645978	0.868803	phosphopantetheine binding	Chitinase	Exo-alpha-sialidase.
37306	7452665	1218	90.6807	734	58.5989	1.54748	0.646211	0.584357	DNA binding	NA	NA
21306	7444663	12052	897.277	7263	579.842	1.54745	0.646223	0.555407	NA	NA	NA
25240	7453141	287	21.3673	173	13.8115	1.54707	0.646383	0.676621	NA	NA	NA
22922	7442299	763	56.8057	460	36.7241	1.54682	0.646486	0.603841	calcium ion binding	Vacuolar protein sorting-associated protein	NA
25332	7442182	262	19.506	158	12.6139	1.54639	0.646668	0.687759	transcription factor activity	beta-1,6-N-acetylglucosaminyltransferase, contains WSC domain	NA
3621	7441932	63	4.69038	38	3.03373	1.54608	0.646798	0.919288	calcium ion binding	C-type lectin	NA
4879	7452239	184	13.6989	111	8.86169	1.54586	0.646891	0.73503	NA	NA	NA
32805	7443827	58	4.31813	35	2.79423	1.54538	0.647092	0.935293	ATP binding	AAA+-type ATPase	NA
22526	7447246	4756	354.087	2871	229.206	1.54484	0.647317	0.564822	ATP binding	Multidrug/pheromone exporter, ABC superfamily	Proteasome endopeptidase complex.
1926	7452546	598	44.5214	361	28.8204	1.54479	0.647339	0.620284	NA	NA	NA
7180	7450701	268	19.9527	162	12.9333	1.54274	0.648196	0.690359	NA	Histone deacetylase complex, SIN3 component	NA
12193	7452026	86	6.40274	52	4.15142	1.5423	0.648382	0.867451	NA	NA	NA
21795	7451692	1392	103.635	842	67.2211	1.54171	0.648632	0.59003	extracellular region	Defense-related protein containing SCP domain	NA
4655	7443708	286	21.2928	173	13.8115	1.54168	0.648643	0.684747	integral to membrane	Tyrosine kinase specific for activated (GTP-bound) p21cdc42Hs	NA
23832	7449862	790	58.8159	478	38.1611	1.54125	0.648824	0.611248	DNA binding	LRR-containing protein	NA
2407	7450251	38	2.82912	23	1.83621	1.54074	0.649038	0.988884	NA	Uncharacterized conserved coiled-coil protein	NA
263404	7449808	38	2.82912	23	1.83621	1.54074	0.649038	0.988884	cysteine-type endopeptidase activity	Cysteine proteinase Cathepsin L	Cysteine-type carboxypeptidase.
11731	7442805	482	35.8851	292	23.3118	1.53935	0.649623	0.642714	catalytic activity	NA	NA
22544	7448460	543	40.4266	329	26.2657	1.53914	0.649713	0.635179	oxidoreductase activity	Delta 6-fatty acid desaturase/delta-8 sphingolipid desaturase	NA
3266	7441788	66	4.91373	40	3.1934	1.53871	0.649893	0.916099	NA	Claspin, protein mediating phosphorylation and activation of Chk1 protein kinase in the DNA replication checkpoint response	NA
6597	7446369	66	4.91373	40	3.1934	1.53871	0.649893	0.916099	NA	NA	NA
1921	7452436	122	9.08296	74	5.90779	1.53745	0.650426	0.808604	S-adenosylmethionine-dependent methyltransferase activity	SAM-dependent methyltransferases	Phosphoethanolamine N-methyltransferase.
20796	7451449	206	15.3368	125	9.97938	1.53685	0.650682	0.731208	protein binding	Vesicle coat complex COPII, subunit SFB3	NA
6408	7442749	206	15.3368	125	9.97938	1.53685	0.650682	0.731208	NA	NA	NA
22016	7443811	1305	97.1579	792	63.2293	1.5366	0.650789	0.600371	ATP binding	Multidrug/pheromone exporter, ABC superfamily	Proteasome endopeptidase complex.
3517	7441878	28	2.08461	17	1.3572	1.53597	0.651054	1	NA	NA	NA
33859	7447504	56	4.16923	34	2.71439	1.53597	0.651054	0.948408	electron transport	NA	NAD(P)(+) transhydrogenase (AB-specific).
22994	7451150	168	12.5077	102	8.14317	1.53597	0.651054	0.761137	integral to membrane	Predicted steroid reductase	NA
5866	7448358	74	5.50934	45	3.59258	1.53353	0.652089	0.899762	calcium ion binding	Serine/threonine protein phosphatase 2A, regulatory subunit	NA
22694	7446467	342	25.4621	208	16.6057	1.53333	0.652173	0.679229	metabolism	Peroxisomal membrane protein MPV17 and related proteins	NA
7645	7449818	723	53.8277	440	35.1274	1.53236	0.65259	0.629999	oxidoreductase activity	Aldo/keto reductase family proteins	NA
7338	7443420	92	6.84945	56	4.47076	1.53205	0.652719	0.864948	NA	NA	NA
7771	7444943	23	1.71236	14	1.11769	1.53205	0.652719	1	double-stranded RNA binding	Chitinase	NA
6723	7448941	1590	118.376	968	77.2803	1.53178	0.652836	0.603223	NA	NA	NA
7839	7451023	450	33.5027	274	21.8748	1.53157	0.652926	0.659467	metabotropic glutamate, GABA-B-like receptor activity	GABA-B ion channel receptor subunit GABABR1 and related subunits, G-protein coupled receptor superfamily	NA
22630	7451772	5111	380.516	3114	248.606	1.5306	0.653339	0.588626	exo-alpha-sialidase activity	Chitinase	Exo-alpha-sialidase.
25426	7450896	269	20.0272	164	13.0929	1.52962	0.653759	0.70877	NA	Splicing coactivator SRm160/300, subunit SRm300	NA
270348	7449871	428	31.8648	261	20.8369	1.52925	0.653917	0.666708	NA	NA	NA
789	7444213	523	38.9376	319	25.4674	1.52892	0.654056	0.653319	protein kinase activity	Ca2+/calmodulin-dependent protein kinase, EF-Hand protein superfamily	NA
27557	7449509	2464	183.446	1503	119.992	1.52882	0.6541	0.599854	ATP binding	Transporter, ABC superfamily (Breast cancer resistance protein)	NA
23829	7449859	1796	133.713	1096	87.4992	1.52816	0.65438	0.606648	NA	Protein kinase PITSLRE and related kinases	NA
10802	7450943	331	24.6431	202	16.1267	1.5281	0.654409	0.690006	NA	Chromatin remodeling complex WSTF-ISWI, large subunit (contains heterochromatin localization, PHD and BROMO domains)	NA
3781	7445330	154	11.4654	94	7.50449	1.5278	0.654535	0.783071	NA	Nuclear receptor coregulator SMRT/SMRTER, contains Myb-like domains	NA
11905	7448231	455	33.875	278	22.1941	1.5263	0.655178	0.666724	NA	von Willebrand factor and related coagulation proteins	NA
4760	7451952	36	2.68022	22	1.75637	1.526	0.655309	0.998901	catalytic activity	NA	NA
21779	7448779	108	8.04065	66	5.26911	1.526	0.655309	0.842064	nucleic acid binding	von Willebrand factor and related coagulation proteins	NA
7885	7444999	18	1.34011	11	0.878185	1.526	0.655309	1	catalytic activity	NA	NA
3280	7444698	18	1.34011	11	0.878185	1.526	0.655309	1	NA	Extracellular protein SEL-1 and related proteins	NA
1770	7445246	18	1.34011	11	0.878185	1.526	0.655309	1	NA	NA	NA
23818	7449847	1605	119.493	982	78.398	1.52419	0.656088	0.615837	NA	NA	NA
1905	7452535	67	4.98818	41	3.27324	1.52393	0.656198	0.924377	NA	NA	NA
34348	7442307	116	8.63626	71	5.66829	1.52361	0.656336	0.832292	adenosylmethionine decarboxylase activity	S-adenosylmethionine decarboxylase	Adenosylmethionine decarboxylase.
5896	7448378	98	7.29615	60	4.7901	1.52317	0.656525	0.862515	RNA binding	Ribonuclease, T2 family	NA
9289	7450544	31	2.30797	19	1.51687	1.52154	0.657231	1	trypsin activity	Trypsin	Tryptase.
32191	7442251	31	2.30797	19	1.51687	1.52154	0.657231	1	NA	RNA polymerase II transcription factor complex subunit	NA
24227	7446898	486	36.1829	298	23.7908	1.52088	0.657515	0.670546	NA	NA	NA
25381	7442997	1832	136.393	1124	89.7346	1.51996	0.65791	0.62018	NA	NA	NA
7967	7449309	44	3.27582	27	2.15555	1.51972	0.658017	0.980317	ATP binding	Inorganic phosphate transporter	L-arabinose isomerase.
37338	7441827	417	31.0459	256	20.4378	1.51904	0.658309	0.68423	electron transporter activity	Thioredoxin/protein disulfide isomerase	Protein disulfide isomerase.
3702	7449520	530	39.4588	326	26.0262	1.51612	0.65958	0.672412	NA	NA	NA
8051	7453042	26	1.93571	16	1.27736	1.5154	0.659891	1	phosphatidylcholine-sterol O-acyltransferase activity	Lecithin:cholesterol acyltransferase (LCAT)/Acyl-ceramide synthase	Lysophospholipase.
8959	7449368	26	1.93571	16	1.27736	1.5154	0.659891	1	nucleotide binding	AAA+-type ATPase	Microtubule-severing ATPase.
5728	7442266	26	1.93571	16	1.27736	1.5154	0.659891	1	NA	FOG: RRM domain	NA
5009	7447257	13	0.967856	8	0.63868	1.5154	0.659891	1	NA	NA	NA
13877	7449490	13	0.967856	8	0.63868	1.5154	0.659891	1	NA	Copine	NA
269633	7447591	13	0.967856	8	0.63868	1.5154	0.659891	1	NA	NA	NA
262858	7442344	13	0.967856	8	0.63868	1.5154	0.659891	1	NA	IkappaB kinase complex, IKAP component	NA
7975	7443524	13	0.967856	8	0.63868	1.5154	0.659891	1	translation initiation factor activity	Filamentous baseplate protein Ligatin, contains PUA domain	NA
262659	7444920	13	0.967856	8	0.63868	1.5154	0.659891	1	trypsin activity	Trypsin	Tryptase.
2215	7442249	169	12.5821	104	8.30284	1.5154	0.659891	0.784882	NA	NA	NA
3167	7442484	52	3.87143	32	2.55472	1.5154	0.659891	0.965175	NA	NA	NA
264137	7450856	39	2.90357	24	1.91604	1.5154	0.659891	0.993935	signal transducer activity	G-protein alpha subunit (small G protein superfamily)	NA
9688	7450821	39	2.90357	24	1.91604	1.5154	0.659891	0.993935	signal transducer activity	FOG: Zn-finger	NA
25246	7453146	2109	157.016	1298	103.626	1.51522	0.65997	0.625659	nucleic acid binding	CREB binding protein/P300 and related TAZ Zn-finger proteins	Histone acetyltransferase.
261260	7442250	650	48.3928	401	32.0138	1.51162	0.661541	0.668139	inorganic phosphate transporter activity	Na+/Pi symporter	NA
262371	7447240	47	3.49917	29	2.31522	1.51138	0.661646	0.976527	NA	DEAD box containing helicases	NA
21141	7448629	102	7.59395	63	5.02961	1.50985	0.662317	0.868294	5-amino-6-(5-phosphoribosylamino)uracil reductase activity	NA	NA
264344	7450317	68	5.06263	42	3.35307	1.50985	0.662317	0.93245	3',5'-cyclic-nucleotide phosphodiesterase activity	Cyclic GMP phosphodiesterase	3',5'-cyclic-nucleotide phosphodiesterase.
35818	7443464	1159	86.2881	716	57.1619	1.50954	0.662454	0.648815	GTP binding	Ras-related GTPase	NA
1783	7445014	89	6.62609	55	4.39093	1.50904	0.662672	0.889334	rhodopsin-like receptor activity	Uncharacterized conserved protein	NA
2521	7444670	603	44.8936	373	29.7785	1.50759	0.663311	0.678459	NA	Adiponutrin and related vesicular transport proteins; predicted alpha/beta hydrolase	NA
10588	7444180	42	3.12692	26	2.07571	1.50643	0.663819	0.989346	NA	NA	NA
261403	7444678	42	3.12692	26	2.07571	1.50643	0.663819	0.989346	NA	Predicted sugar transporter	NA
263509	7449303	21	1.56346	13	1.03786	1.50643	0.663819	1	mismatch repair	DNA mismatch repair protein - MLH1 family	NA
1255	7451547	21	1.56346	13	1.03786	1.50643	0.663819	1	NA	beta-1,6-N-acetylglucosaminyltransferase, contains WSC domain	NA
8561	7446916	21	1.56346	13	1.03786	1.50643	0.663819	1	NA	NA	NA
264699	7448536	21	1.56346	13	1.03786	1.50643	0.663819	1	UDP-N-acetylmuramoylalanyl-D-glutamyl-2,6-diaminopimelate-D-alanyl-D-alanine ligase activity	Uncharacterized conserved protein, contains RCC1 domain	Acid--D-amino-acid ligases (peptide synthases).
2578	7443027	428	31.8648	265	21.1563	1.50616	0.663939	0.702117	metabolism	NA	NA
23576	7447151	3796	282.614	2351	187.692	1.50573	0.664129	0.633846	NA	Chromodomain-helicase DNA-binding protein	NA
2564	7444696	100	7.44505	62	4.94977	1.50412	0.664841	0.876168	NA	NA	NA
1022	7445263	129	9.60411	80	6.3868	1.50374	0.665007	0.837368	NA	NA	NA
24029	7448095	208	15.4857	129	10.2987	1.50365	0.665047	0.773848	NA	Nucleolar GTPase/ATPase p130	NA
22758	7453184	777	57.848	482	38.4805	1.50331	0.665199	0.673204	microtubule motor activity	Dynein light chain type 1	NA
6379	7442734	58	4.31813	36	2.87406	1.50245	0.66558	0.959527	NA	NA	NA
2487	7450371	29	2.15906	18	1.43703	1.50245	0.66558	1	NA	Splicing coactivator SRm160/300, subunit SRm300	NA
6628	7446580	29	2.15906	18	1.43703	1.50245	0.66558	1	NA	NA	NA
27850	7453352	2977	221.639	1849	147.615	1.50147	0.666015	0.643974	catalytic activity	Phosphoglycerate mutase	Phosphoglycerate mutase.
3215	7441762	66	4.91373	41	3.27324	1.50119	0.66614	0.944135	regulation of cell cycle	G2/Mitotic-specific cyclin A	NA
20812	7445018	7174	534.108	4458	355.904	1.50071	0.666353	0.63832	NA	NA	NA
21948	7452057	45	3.35027	28	2.23538	1.49875	0.667224	0.985115	NA	NA	NA
22741	7453174	61	4.54148	38	3.03373	1.497	0.668005	0.956979	NA	NA	NA
22623	7451766	138	10.2742	86	6.86581	1.49642	0.66826	0.835724	nucleic acid binding	K-homology type RNA binding proteins	NA
25218	7453120	969	72.1425	604	48.2203	1.4961	0.668404	0.676539	NA	Splicing coactivator SRm160/300, subunit SRm300	NA
22763	7450089	1302	96.9345	812	64.826	1.4953	0.668761	0.669089	NA	Putative Mg2+ and Co2+ transporter CorD	NA
1797	7445110	173	12.8799	108	8.62218	1.49381	0.669427	0.80814	NA	Uncharacterized conserved protein, contains JmjC domain	NA
23757	7445601	181	13.4755	113	9.02136	1.49374	0.669462	0.802626	ATP binding	Projectin/twitchin and related proteins	NA
21802	7441894	269	20.0272	168	13.4123	1.4932	0.669704	0.761146	DNA ligase (ATP) activity	Nucleolar GTPase/ATPase p130	DNA ligase (ATP).
4772	7451957	152	11.3165	95	7.58433	1.49209	0.670202	0.827217	NA	NA	NA
3629	7451279	56	4.16923	35	2.79423	1.49209	0.670202	0.966718	cysteine-type endopeptidase activity	Ubiquitin-specific protease	Ubiquitin thiolesterase.
2679	7446676	128	9.52966	80	6.3868	1.49209	0.670202	0.851948	NA	Permease of the major facilitator superfamily	NA
37232	7445759	64	4.76483	40	3.1934	1.49209	0.670202	0.954592	electron transport	NA	NA
22946	7447226	8	0.595604	5	0.399175	1.49209	0.670202	1	NA	NA	NA
14147	7453205	8	0.595604	5	0.399175	1.49209	0.670202	1	catalytic activity	Threonine/serine dehydratases	NA
268167	7442196	8	0.595604	5	0.399175	1.49209	0.670202	1	NA	NA	NA
5510	7453209	16	1.19121	10	0.79835	1.49209	0.670202	1	NA	Fucosyltransferase	NA
22530	7448449	16	1.19121	10	0.79835	1.49209	0.670202	1	NA	NA	NA
8544	7450754	16	1.19121	10	0.79835	1.49209	0.670202	1	NA	Predicted E3 ubiquitin ligase	NA
14527	7448734	16	1.19121	10	0.79835	1.49209	0.670202	1	sugar porter activity	Predicted transporter (major facilitator superfamily)	L-arabinose isomerase.
11797	7443882	8	0.595604	5	0.399175	1.49209	0.670202	1	NA	NA	NA
9806	7452663	16	1.19121	10	0.79835	1.49209	0.670202	1	DNA binding	NA	NA
9314	7452968	16	1.19121	10	0.79835	1.49209	0.670202	1	NA	NA	NA
1201	7445037	8	0.595604	5	0.399175	1.49209	0.670202	1	NA	NA	NA
31622	7445147	8	0.595604	5	0.399175	1.49209	0.670202	1	NA	Uncharacterized membrane protein, predicted efflux pump	NA
2218	7448660	8	0.595604	5	0.399175	1.49209	0.670202	1	transcription factor activity	Heat shock transcription factor	NA
24523	7447577	8	0.595604	5	0.399175	1.49209	0.670202	1	extracellular region	Chromodomain-helicase DNA-binding protein	NA
17735	7443718	8	0.595604	5	0.399175	1.49209	0.670202	1	catalytic activity	Phosphoglycerate mutase	Phosphoglycerate mutase.
24956	7441862	8	0.595604	5	0.399175	1.49209	0.670202	1	NA	NA	NA
262580	7448161	8	0.595604	5	0.399175	1.49209	0.670202	1	S-adenosylmethionine-dependent methyltransferase activity	Spermidine synthase	NA
261387	7444649	8	0.595604	5	0.399175	1.49209	0.670202	1	mitochondrion	Mitochondrial F1-ATPase assembly protein	NA
3680	7451306	8	0.595604	5	0.399175	1.49209	0.670202	1	NA	NA	NA
3378	7448714	8	0.595604	5	0.399175	1.49209	0.670202	1	NA	Uncharacterized conserved protein	NA
21355	7446647	8	0.595604	5	0.399175	1.49209	0.670202	1	exo-alpha-sialidase activity	NA	Exo-alpha-sialidase.
11858	7448209	8	0.595604	5	0.399175	1.49209	0.670202	1	NA	NA	NA
9431	7445751	144	10.7209	90	7.18515	1.49209	0.670202	0.834721	NA	NA	NA
25640	7443376	550	40.9478	344	27.4632	1.491	0.67069	0.709919	NA	Uncharacterized conserved protein	NA
268243	7446527	406	30.2269	254	20.2781	1.49062	0.670862	0.730073	NA	NA	NA
261447	7446657	20	1.48901	0	0	>=1.489009805	0	0.307141	NA	NA	NA
13459	7445007	83	6.17939	52	4.15142	1.4885	0.671817	0.917249	ATP binding	Putative ATP-dependent Clp-type protease (AAA+ ATPase superfamily)	NA
1150	7453458	83	6.17939	52	4.15142	1.4885	0.671817	0.917249	pseudouridylate synthase activity	NA	NA
21544	7452920	691	51.4453	433	34.5686	1.48821	0.671948	0.702826	NA	NA	NA
25576	7447808	868	64.623	544	43.4302	1.48797	0.672055	0.693793	protein amino acid glycosylation	NA	NA
263873	7449381	295	21.9629	185	14.7695	1.48705	0.672474	0.761268	binding	Mitochondrial phosphate carrier protein	NA
20891	7443131	110	8.18955	69	5.50862	1.48668	0.672639	0.878506	NA	Predicted membrane protein, contains DoH and Cytochrome b-561/ferric reductase transmembrane domains	NA
261492	7452448	51	3.79698	32	2.55472	1.48626	0.67283	0.977577	hydrolase activity	Inosine triphosphate pyrophosphatase	Nucleoside-triphosphate pyrophosphatase.
2600	7443037	94	6.99835	59	4.71027	1.48576	0.673054	0.901122	NA	NA	NA
3842	7445359	266	19.8038	167	13.3324	1.48539	0.673226	0.772545	NA	NA	NA
1417	7451476	395	29.4079	248	19.7991	1.48532	0.673256	0.74035	NA	Predicted membrane protein	NA
24056	7450984	215	16.0069	135	10.7777	1.48518	0.673319	0.7938	protein kinase activity	Ca2+/calmodulin-dependent protein kinase, EF-Hand protein superfamily	NA
22322	7446131	218	16.2302	137	10.9374	1.48392	0.673891	0.793962	NA	Uncharacterized conserved protein	NA
260761	7447615	498	37.0763	313	24.9884	1.48374	0.67397	0.7273	NA	NA	NA
5266	7449579	35	2.60577	22	1.75637	1.48361	0.674032	1	cysteine-type endopeptidase activity	NA	NA
23911	7449261	167	12.4332	105	8.38268	1.48321	0.674215	0.825666	NA	NA	NA
21216	7450191	396	29.4824	249	19.8789	1.4831	0.674264	0.743617	NA	NA	NA
6857	7449009	159	11.8376	100	7.9835	1.48276	0.674417	0.832508	integral to membrane	NA	NA
6332	7442715	62	4.61593	39	3.11357	1.48252	0.674526	0.96123	NA	NA	NA
889	7445489	372	27.6956	234	18.6814	1.48252	0.674526	0.749137	NA	NA	NA
4385	7453341	5559	413.87	3500	279.423	1.48116	0.675145	0.673049	NA	NA	NA
3900	7445388	173	12.8799	109	8.70202	1.48011	0.675626	0.825112	NA	NA	NA
22183	7447499	2242	166.918	1413	112.807	1.47968	0.675822	0.684611	histone acetyltransferase activity	Calcium-responsive transcription coactivator	Histone acetyltransferase.
32704	7452748	46	3.42472	29	2.31522	1.47922	0.67603	0.989765	cAMP-dependent protein kinase complex	cAMP-dependent protein kinase types I and II, regulatory subunit	Phosphotransferases with an alcohol group as acceptor.
24597	7452976	1478	110.038	932	74.4062	1.47888	0.676188	0.693556	NA	RNA polymerase II, large subunit	NA
9569	7447863	65	4.83928	41	3.27324	1.47844	0.676389	0.958743	exo-alpha-sialidase activity	beta-1,6-N-acetylglucosaminyltransferase, contains WSC domain	Exo-alpha-sialidase.
6418	7453471	623	46.3827	393	31.3752	1.47832	0.676442	0.723789	NA	NA	NA
25011	7442010	233	17.347	147	11.7357	1.47813	0.67653	0.794717	NA	NA	NA
6630	7446582	485	36.1085	306	24.4295	1.47807	0.676559	0.737962	NA	Transcription regulator XNP/ATRX, DEAD-box superfamily	NA
7584	7450174	553	41.1711	349	27.8624	1.47766	0.676747	0.731032	pepsin A activity	Aspartyl protease	NA
40073	7452074	1212	90.234	765	61.0738	1.47746	0.676838	0.700752	carbohydrate metabolism	Glycerol-3-phosphate dehydrogenase/dihydroxyacetone 3-phosphate reductase	Glycerol-3-phosphate dehydrogenase (NAD+).
10886	7442974	19	1.41456	12	0.95802	1.47654	0.677257	1	damaged DNA binding	DNA repair protein RAD51/RHP55	NA
7825	7444969	19	1.41456	12	0.95802	1.47654	0.677257	1	NA	NA	NA
9514	7446950	19	1.41456	12	0.95802	1.47654	0.677257	1	NA	NA	NA
7816	7452383	19	1.41456	12	0.95802	1.47654	0.677257	1	catalytic activity	Sensory transduction histidine kinase	NA
20663	7453435	19	1.41456	12	0.95802	1.47654	0.677257	1	monooxygenase activity	Kynurenine 3-monooxygenase and related flavoprotein monooxygenases	NA
270361	7445514	361	26.8766	228	18.2024	1.47654	0.677257	0.760122	NA	NA	NA
263879	7445790	304	22.6329	192	15.3283	1.47654	0.677257	0.773034	nucleotide binding	Origin recognition complex, subunit 1, and related proteins	NA
23416	7449006	3836	285.592	2423	193.44	1.47638	0.677331	0.684089	extracellular region	NA	NA
25617	7443356	921	68.5689	582	46.464	1.47574	0.677625	0.711903	NA	Predicted transporter/transmembrane protein	NA
4136	7442064	430	32.0137	272	21.7151	1.47426	0.678307	0.751607	NA	NA	NA
25315	7442163	1636	121.801	1035	82.6292	1.47407	0.678395	0.699518	NA	Myosin class II heavy chain	NA
21138	7452197	531	39.5332	336	26.8246	1.47377	0.678532	0.739544	NA	Nuclear helicase MOP-3/SNO (DEAD-box superfamily)	NA
23201	7442722	305	22.7074	193	15.4082	1.47373	0.678552	0.776621	integral to membrane	Predicted small molecule transporter	NA
269723	7451612	346	25.7599	219	17.4839	1.47335	0.678725	0.767568	peptidyl-prolyl cis-trans isomerase activity	Uncharacterized conserved protein	Peptidylprolyl isomerase.
21695	7444723	1292	96.19	818	65.305	1.47293	0.678917	0.706726	metabolism	NA	NA
8353	7445857	60	4.46703	38	3.03373	1.47245	0.679138	0.968123	NA	NA	NA
8065	7453051	30	2.23351	19	1.51687	1.47245	0.679138	1	NA	Putative steroid membrane receptor Hpr6.6/25-Dx	NA
8978	7449377	161	11.9865	102	8.14317	1.47197	0.67936	0.844161	NA	NA	NA
7085	7447097	101	7.5195	64	5.10944	1.47169	0.679492	0.903588	phospholipase C activity	NA	NA
2194	7442240	71	5.28598	45	3.59258	1.47136	0.679642	0.954206	NA	Predicted Mg2+-dependent phosphodiesterase TTRAP	NA
7119	7450671	224	16.6769	142	11.3366	1.47107	0.679777	0.807915	pepsin A activity	Aspartyl protease	Phosphotransferases with an alcohol group as acceptor.
10975	7444805	41	3.05247	26	2.07571	1.47057	0.68001	1	proteolysis and peptidolysis	NA	NA
9476	7446932	134	9.97637	85	6.78598	1.47014	0.680205	0.869542	NA	Histone acetyltransferase SAGA/ADA, catalytic subunit PCAF/GCN5 and related proteins	NA
269792	7441813	2717	202.282	1725	137.715	1.46884	0.680809	0.700599	calcium ion binding	Annexin	Glycerophosphoinositol inositolphosphodiesterase.
21680	7444064	63	4.69038	40	3.1934	1.46877	0.68084	0.965372	NA	NA	NA
263147	7444090	85	6.32829	54	4.31109	1.46791	0.681241	0.931147	lipoate biosynthesis	Lipoyltransferase	Transferring groups other than amino-acyl groups.
1907	7452536	162	12.061	103	8.22301	1.46674	0.681786	0.849874	NA	NA	NA
20189	7449541	11	0.818955	7	0.558845	1.46544	0.682388	1	NA	CDGSH-type Zn-finger containing protein	NA
3459	7448757	11	0.818955	7	0.558845	1.46544	0.682388	1	molecular function unknown	Uncharacterized conserved protein predicted to be involved in protein sorting	Serine endopeptidases.
4821	7451356	11	0.818955	7	0.558845	1.46544	0.682388	1	NA	NA	NA
1841	7445497	11	0.818955	7	0.558845	1.46544	0.682388	1	nucleic acid binding	Spliceosomal protein snRNP-U1A/U2B	NA
3447	7451657	11	0.818955	7	0.558845	1.46544	0.682388	1	NA	NA	NA
4616	7448841	11	0.818955	7	0.558845	1.46544	0.682388	1	NA	NA	NA
24980	7444314	11	0.818955	7	0.558845	1.46544	0.682388	1	sugar porter activity	NA	NA
35424	7444161	11	0.818955	7	0.558845	1.46544	0.682388	1	protein kinase activity	Tyrosine kinase specific for activated (GTP-bound) p21cdc42Hs	NA
1044	7449742	44	3.27582	28	2.23538	1.46544	0.682388	0.998713	NA	NA	NA
262792	7443563	22	1.63791	14	1.11769	1.46544	0.682388	1	NA	NA	NA
24124	7447027	22	1.63791	14	1.11769	1.46544	0.682388	1	NA	NA	NA
10270	7450300	22	1.63791	14	1.11769	1.46544	0.682388	1	NA	NA	NA
11846	7443908	366	27.2489	233	18.6016	1.46487	0.682654	0.775494	NA	Ubinuclein, nuclear protein interacting with cellular and viral transcription factors	NA
5083	7449661	1032	76.8329	658	52.5314	1.46261	0.68371	0.730259	NA	NA	NA
21841	7451277	58	4.31813	37	2.9539	1.46184	0.684068	0.975288	NA	Heterochromatin-associated protein HP1 and related CHROMO domain proteins	NA
10976	7443018	395	29.4079	252	20.1184	1.46174	0.684115	0.774943	RNA binding	RNA pseudouridylate synthases	Pseudouridylate synthase.
4803	7451347	777	57.848	496	39.5982	1.46088	0.684521	0.742855	NA	NA	NA
9118	7445839	119	8.85961	76	6.06746	1.46018	0.684845	0.893217	Mo-molybdopterin cofactor biosynthesis	Molybdenum cofactor biosynthesis pathway protein	NA
23831	7452872	144	10.7209	92	7.34482	1.45965	0.685096	0.871827	NA	Predicted histone tail methylase containing SET domain	NA
39241	7445016	280	20.8461	179	14.2905	1.45874	0.685521	0.804063	GTP binding	GTPase Rab5/YPT51 and related small G protein superfamily GTPases	NA
2350	7446518	61	4.54148	39	3.11357	1.45861	0.685584	0.972253	proteolysis and peptidolysis	NA	NA
22734	7450067	208	15.4857	133	10.6181	1.45843	0.685668	0.832046	NA	NA	NA
6048	7448580	1146	85.3203	733	58.5191	1.45799	0.685875	0.735106	NA	NA	NA
23082	7443601	358	26.6533	229	18.2822	1.45788	0.685928	0.786826	NA	NA	NA
21370	7443063	1679	125.002	1074	85.7428	1.45788	0.685929	0.726663	cysteine-type endopeptidase activity	FOG: RCC1 domain	Acid--D-amino-acid ligases (peptide synthases).
24094	7446992	1041	77.503	666	53.1701	1.45764	0.68604	0.738392	glucan 1,4-alpha-glucosidase activity	Chitinase	Glucan 1,4-alpha-glucosidase.
7510	7450138	186	13.8478	119	9.50037	1.45761	0.686056	0.845116	NA	NA	NA
23224	7442747	25	1.86126	16	1.27736	1.45712	0.686287	1	NA	Uncharacterized conserved protein	NA
17095	7447951	25	1.86126	16	1.27736	1.45712	0.686287	1	protein phosphatase type 2A activity	TFIIF-interacting CTD phosphatase, including NLI-interacting factor (involved in RNA polymerase II regulation)	Serine/threonine specific protein phosphatase.
15593	7444136	25	1.86126	16	1.27736	1.45712	0.686287	1	ATP binding	ATP-dependent DNA helicase	NA
33033	7451271	25	1.86126	16	1.27736	1.45712	0.686287	1	NA	mRNA cleavage and polyadenylation factor II complex, BRR5 (CPSF subunit)	NA
7700	7449848	25	1.86126	16	1.27736	1.45712	0.686287	1	proteolysis and peptidolysis	Putative ubiquitin fusion degradation protein	NA
34684	7443594	189	14.0711	121	9.66004	1.45663	0.686514	0.844596	trypsin activity	Serine protease	Serine endopeptidases.
36774	7449369	103	7.6684	66	5.26911	1.45535	0.68712	0.915888	pantoate-beta-alanine ligase activity	Panthothenate synthetase	Pantoate--beta-alanine ligase.
22767	7450093	607	45.1914	389	31.0558	1.45517	0.687206	0.762003	sodium ion transport	Sodium/hydrogen exchanger protein	NA
24559	7443192	5599	416.848	3590	286.608	1.45442	0.687559	0.719392	NA	NA	NA
3804	7445342	131	9.75301	84	6.70614	1.45434	0.687597	0.88759	NA	NA	NA
24963	7441871	2953	219.852	1894	151.208	1.45398	0.687769	0.725373	NA	NA	NA
264316	7443936	159	11.8376	102	8.14317	1.45369	0.687906	0.86751	dihydroorotate dehydrogenase activity	Dihydroorotate dehydrogenase	Dihydroorotate oxidase.
23641	7443412	1579	117.557	1013	80.8729	1.45361	0.687944	0.735224	NA	NA	NA
24540	7447999	586	43.628	376	30.018	1.4534	0.688044	0.76614	NA	Nucleolar GTPase/ATPase p130	NA
21923	7445331	1644	122.397	1055	84.2259	1.45319	0.688139	0.735103	NA	Nucleolar GTPase/ATPase p130	NA
264143	7450865	243	18.0915	156	12.4543	1.45263	0.688405	0.824669	catalytic activity	Serine/threonine protein phosphatase	Serine/threonine specific protein phosphatase.
23740	7450150	176	13.1033	113	9.02136	1.45247	0.68848	0.857947	metabolism	NA	NA
23490	7447069	151	11.242	97	7.744	1.45171	0.688844	0.874799	protein serine/threonine kinase activity	Ca2+/Mg2+-permeable cation channels (LTRPC family)	NA
24120	7451050	151	11.242	97	7.744	1.45171	0.688844	0.874799	NA	Nucleolar GTPase/ATPase p130	NA
3477	7451670	442	32.9071	284	22.6731	1.45137	0.689004	0.783124	NA	NA	NA
711	7445850	28	2.08461	18	1.43703	1.45064	0.689351	1	structural constituent of ribosome	Na+-bile acid cotransporter	NA
38513	7448514	28	2.08461	18	1.43703	1.45064	0.689351	1	subtilase activity	Predicted unusual protein kinase	NA
7066	7447087	266	19.8038	171	13.6518	1.45064	0.689351	0.819441	NA	NA	NA
4972	7447235	14	1.04231	9	0.718515	1.45064	0.689351	1	NA	NA	NA
268054	7443107	14	1.04231	9	0.718515	1.45064	0.689351	1	NA	NA	NA
35798	7445556	14	1.04231	9	0.718515	1.45064	0.689351	1	nucleotide binding	AAA+-type ATPase containing the peptidase M41 domain	Adenosinetriphosphatase.
22720	7449645	14	1.04231	9	0.718515	1.45064	0.689351	1	NA	Pinin (desmosome-associated protein)	NA
5655	7445212	14	1.04231	9	0.718515	1.45064	0.689351	1	NA	SAM-dependent methyltransferases	NA
21636	7444011	14	1.04231	9	0.718515	1.45064	0.689351	1	NA	Nucleolar GTPase/ATPase p130	NA
262254	7443727	14	1.04231	9	0.718515	1.45064	0.689351	1	ATP binding	ATPase component of ABC transporters with duplicated ATPase domains/Translation elongation factor EF-3b	NA
261495	7452451	14	1.04231	9	0.718515	1.45064	0.689351	1	metalloendopeptidase activity	NA	NA
32522	7449515	14	1.04231	9	0.718515	1.45064	0.689351	1	DNA binding	Helicase of the DEAD superfamily	In phosphorous-containing anhydrides.
25735	7443889	2418	180.021	1555	124.143	1.45011	0.689604	0.734453	NA	NA	NA
24735	7450525	6559	488.321	4220	336.904	1.44944	0.689923	0.727368	transporter activity	Endosomal membrane proteins, EMP70	NA
21656	7441773	7101	528.673	4570	364.846	1.44903	0.690117	0.727736	NA	SWI-SNF chromatin-remodeling complex protein	NA
23747	7445588	778	57.9225	501	39.9973	1.44816	0.690532	0.763017	NA	CREB binding protein/P300 and related TAZ Zn-finger proteins	NA
2587	7443030	59	4.39258	38	3.03373	1.44791	0.690649	0.979401	NA	NA	NA
32108	7448702	45	3.35027	29	2.31522	1.44707	0.691053	1	electron transporter activity	Ferredoxin	NA
32789	7443812	62	4.61593	40	3.1934	1.44546	0.691822	0.976277	ligase activity	3-Methylcrotonyl-CoA carboxylase, non-biotin containing subunit/Acetyl-CoA carboxylase carboxyl transferase, subunit beta	Propionyl-CoA carboxylase.
24145	7445856	31	2.30797	20	1.5967	1.44546	0.691822	1	NA	NA	NA
5788	7442295	31	2.30797	20	1.5967	1.44546	0.691822	1	transcription	Predicted transcription factor DATF1, contains PHD and TFS2M domains	Glucan 1,4-alpha-glucosidase.
261064	7445485	31	2.30797	20	1.5967	1.44546	0.691822	1	two-component response regulator activity	NA	NA
25831	7442637	48	3.57362	31	2.47489	1.44396	0.692542	0.998642	NA	NA	NA
22521	7447242	689	51.2964	445	35.5266	1.44389	0.692575	0.773726	NA	Transcription coactivator	NA
262335	7451393	633	47.1272	409	32.6525	1.44329	0.69286	0.777887	methyltransferase activity	SAM-dependent methyltransferases	NA
23872	7452366	390	29.0357	252	20.1184	1.44324	0.692886	0.80216	NA	Glycolipid transfer protein	NA
9581	7447870	294	21.8884	190	15.1687	1.44301	0.692998	0.821917	sugar binding	NA	NA
1937	7452550	266	19.8038	172	13.7316	1.44221	0.693382	0.831021	NA	Nucleolar GTPase/ATPase p130	NA
29950	7450847	204	15.1879	132	10.5382	1.44122	0.693856	0.856708	nucleosome	Histones H3 and H4	NA
2412	7450254	34	2.53132	22	1.75637	1.44122	0.693856	1	NA	NA	NA
21617	7442475	289	21.5162	187	14.9291	1.44122	0.693856	0.82573	NA	Glycolipid 2-alpha-mannosyltransferase (alpha-1,2-mannosyltransferase)	NA
7363	7452398	136	10.1253	88	7.02548	1.44122	0.693856	0.896455	NA	NA	NA
6952	7444109	17	1.26566	11	0.878185	1.44122	0.693856	1	NA	NA	NA
3436	7448745	17	1.26566	11	0.878185	1.44122	0.693856	1	NA	Chitinase	NA
262616	7444863	17	1.26566	11	0.878185	1.44122	0.693856	1	NA	NA	NA
23786	7449810	17	1.26566	11	0.878185	1.44122	0.693856	1	electron transporter activity	NA	NA
3105	7442448	17	1.26566	11	0.878185	1.44122	0.693856	1	NA	NA	NA
32477	7450490	17	1.26566	11	0.878185	1.44122	0.693856	1	catalytic activity	Ornithine decarboxylase	Ornithine decarboxylase.
17910	7447061	17	1.26566	11	0.878185	1.44122	0.693856	1	ubiquitin conjugating enzyme activity	Ubiquitin-protein ligase	Ubiquitin--protein ligase.
1941	7452552	1080	80.4065	699	55.8047	1.44086	0.694032	0.764672	NA	NA	NA
21784	7451685	981	73.0359	635	50.6952	1.44069	0.694114	0.767381	nucleic acid binding	NA	NA
16501	7450605	207	15.4113	134	10.6979	1.44059	0.694161	0.856084	protein kinase activity	cAMP-dependent protein kinase catalytic subunit (PKA)	NA
22781	7450183	1591	118.451	1030	82.2301	1.44048	0.694213	0.757351	NA	Chitinase	NA
22683	7446452	539	40.1288	349	27.8624	1.44025	0.694324	0.789308	histone acetyltransferase activity	von Willebrand factor and related coagulation proteins	Histone acetyltransferase.
25872	7442687	335	24.9409	217	17.3242	1.43966	0.69461	0.817134	NA	NA	NA
4218	7442100	71	5.28598	46	3.67241	1.43938	0.694745	0.967994	NA	NA	NA
38555	7443375	1436	106.911	931	74.3264	1.4384	0.695218	0.762393	microtubule motor activity	Kinesin (KAR3 subfamily)	Adenosinetriphosphatase.
9405	7445739	37	2.75467	24	1.91604	1.43769	0.695561	1	electron transport	NA	NA
24826	7451224	2499	186.052	1621	129.413	1.43766	0.695573	0.755586	NA	NA	NA
268410	7442471	57	4.24368	37	2.9539	1.43664	0.69607	0.986833	protein kinase activity	Protein kinase PCTAIRE and related kinases	Protein kinase.
40894	7451123	1865	138.85	1211	96.6802	1.43618	0.696292	0.761549	protein folding	Molecular chaperone (DnaJ superfamily)	NA
33153	7444026	77	5.73269	50	3.99175	1.43613	0.696314	0.963233	protein folding	Cyclophilin-related peptidyl-prolyl cis-trans isomerase	Peptidylprolyl isomerase.
4991	7447248	77	5.73269	50	3.99175	1.43613	0.696314	0.963233	NA	NA	NA
21147	7442226	705	52.4876	458	36.5644	1.43548	0.69663	0.785536	integral to membrane	Predicted membrane protein	NA
6960	7444113	40	2.97802	26	2.07571	1.4347	0.69701	1	S-adenosylmethionine-dependent methyltransferase activity	Predicted spermine/spermidine synthase	NA
6922	7449224	20	1.48901	13	1.03786	1.4347	0.69701	1	NA	Uncharacterized conserved protein	NA
10683	7442126	20	1.48901	13	1.03786	1.4347	0.69701	1	nucleus	Small Nuclear ribonucleoprotein splicing factor	NA
13065	7447893	20	1.48901	13	1.03786	1.4347	0.69701	1	acyltransferase activity	Carnitine O-acyltransferase CPT2/YAT1	Carnitine O-acetyltransferase.
24753	7451613	1549	115.324	1007	80.3939	1.43449	0.697114	0.767127	protein binding	Vacuolar protein sorting-associated protein	NA
1943	7449775	1138	84.7247	740	59.0779	1.43412	0.697293	0.773808	transcription factor activity	Heat shock transcription factor	NA
3688	7449511	318	23.6753	207	16.5258	1.43262	0.698022	0.830747	transporter activity	NA	NA
23116	7442347	797	59.337	519	41.4344	1.43207	0.698288	0.78658	NA	NA	NA
23039	7451182	706	52.562	460	36.7241	1.43127	0.698681	0.79186	NA	Ca2+-modulated nonselective cation channel polycystin	NA
31562	7445047	293	21.814	191	15.2485	1.43057	0.699023	0.839602	NA	NA	NA
34514	7445192	431	32.0882	281	22.4336	1.43036	0.699125	0.815084	glucose-6-phosphate 1-dehydrogenase activity	Glucose-6-phosphate 1-dehydrogenase	Glucose-6-phosphate 1-dehydrogenase.
269726	7451627	46	3.42472	30	2.39505	1.42992	0.699341	1	trypsin activity	Trypsin	Tryptase.
2910	7452891	92	6.84945	60	4.7901	1.42992	0.699341	0.953333	microtubule motor activity	ER-Golgi vesicle-tethering protein p115	NA
3653	7441948	23	1.71236	15	1.19753	1.42992	0.699341	1	NA	Nucleolar GTPase/ATPase p130	NA
21951	7445355	23	1.71236	15	1.19753	1.42992	0.699341	1	NA	Predicted patched transmembrane receptor	NA
269314	7443410	23	1.71236	15	1.19753	1.42992	0.699341	1	NA	Protein predicted to be involved in carbohydrate metabolism	NA
24497	7445833	394	29.3335	257	20.5176	1.42967	0.69946	0.82116	NA	FOG: Zn-finger	NA
22071	7442035	653	48.6162	426	34.0097	1.42948	0.699556	0.797416	calcium ion binding	Voltage-gated Ca2+ channels, alpha1 subunits	NA
3646	7451288	141	10.4975	92	7.34482	1.42924	0.699672	0.90476	NA	NA	NA
7087	7450657	904	67.3032	590	47.1027	1.42886	0.699857	0.787724	NA	Ultrahigh sulfur keratin-associated protein	NA
6838	7449181	72	5.36044	47	3.75225	1.42859	0.699989	0.971677	NA	NA	NA
23417	7449007	3580	266.533	2337	186.574	1.42856	0.700006	0.766713	urea transporter activity	NA	NA
5287	7449591	121	9.00851	79	6.30697	1.42834	0.700112	0.922141	NA	NA	NA
20875	7443110	147	10.9442	96	7.66416	1.42797	0.700293	0.901831	NA	NA	NA
268695	7447963	1381	102.816	902	72.0112	1.42778	0.700388	0.779636	NA	Bifunctional GTP cyclohydrolase II/3,4-dihydroxy-2butanone-4-phosphate synthase	NA
8349	7445854	638	47.4994	417	33.2912	1.42679	0.700876	0.802368	dihydrokaempferol 4-reductase activity	Flavonol reductase/cinnamoyl-CoA reductase	Dihydrokaempferol 4-reductase.
1172	7445290	26	1.93571	17	1.3572	1.42626	0.701135	1	exo-alpha-sialidase activity	Chitinase	Exo-alpha-sialidase.
6672	7446606	26	1.93571	17	1.3572	1.42626	0.701135	1	NA	NA	NA
24764	7450820	1870	139.222	1223	97.6382	1.4259	0.701311	0.777636	NA	NA	NA
25582	7447818	133	9.90192	87	6.94565	1.42563	0.701445	0.914529	nucleic acid binding	Heterochromatin-associated protein HP1 and related CHROMO domain proteins	Peptidylprolyl isomerase.
28592	7448609	855	63.6552	560	44.7076	1.42381	0.702341	0.797075	homoserine kinase activity	Homoserine kinase	Homoserine kinase.
11933	7449437	229	17.0492	150	11.9753	1.4237	0.702395	0.868224	NA	NA	NA
3462	7448759	116	8.63626	76	6.06746	1.42337	0.702557	0.9318	NA	NA	NA
22780	7453208	29	2.15906	19	1.51687	1.42337	0.702557	1	Mo-molybdopterin cofactor biosynthesis	Molybdopterin biosynthesis protein	NA
7656	7452840	206	15.3368	135	10.7777	1.42301	0.702736	0.877026	NA	NA	NA
24561	7448023	383	28.5145	251	20.0386	1.42298	0.70275	0.832574	protein binding	NA	NA
23607	7450584	1036	77.1307	679	54.208	1.42287	0.702807	0.793433	integral to membrane	NA	NA
11737	7443697	819	60.975	537	42.8714	1.42228	0.703099	0.80073	NA	NA	NA
3617	7451274	369	27.4722	242	19.3201	1.42195	0.703258	0.836306	NA	NA	NA
3903	7445389	154	11.4654	101	8.06334	1.42191	0.703277	0.903572	metabolism	Dehydrogenases with different specificities (related to short-chain alcohol dehydrogenases)	NA
1621	7445309	186	13.8478	122	9.73987	1.42176	0.703352	0.886722	NA	Protein required for fusion of vesicles in vesicular transport, alpha-SNAP	NA
7103	7447107	32	2.38242	21	1.67654	1.42104	0.703712	1	NA	Golgi reassembly stacking protein GRASP65, contains PDZ domain	NA
24089	7451013	32	2.38242	21	1.67654	1.42104	0.703712	1	NA	Chitinase	NA
34218	7446414	64	4.76483	42	3.35307	1.42104	0.703712	0.984021	receptor activity	ER lumen protein retaining receptor	NA
7143	7447126	198	14.7412	130	10.3786	1.42035	0.704051	0.883107	NA	NA	NA
269110	7445986	201	14.9645	132	10.5382	1.42003	0.704212	0.882262	NA	Predicted membrane protein	NA
21375	7443069	306	22.7819	201	16.0468	1.41971	0.704369	0.851835	NA	von Willebrand factor and related coagulation proteins	NA
7677	7452849	312	23.2286	205	16.3662	1.4193	0.704572	0.851057	NA	NA	NA
7725	7452871	35	2.60577	23	1.83621	1.4191	0.70467	1	NA	NA	NA
1481	7442932	893	66.4843	587	46.8632	1.41869	0.704876	0.803745	NA	PHD finger protein AF10	NA
268544	7452052	181	13.4755	119	9.50037	1.41842	0.705008	0.892658	electron transport	D-arabinono-1, 4-lactone oxidase	Galactonolactone dehydrogenase.
900	7449165	476	35.4384	313	24.9884	1.4182	0.70512	0.827946	tRNA 5'-leader removal	Ribonucleases P/MRP protein subunit	Ribonuclease P.
30310	7444235	403	30.0035	265	21.1563	1.41819	0.705126	0.836662	oxidoreductase activity	Aldo/keto reductase family proteins	With NAD(+) or NADP(+) as acceptor.
269320	7443434	1645	122.471	1082	86.3815	1.41779	0.705322	0.792279	catalytic activity	dTDP-glucose 4-6-dehydratase/UDP-glucuronic acid decarboxylase	dTDP-glucose 4,6-dehydratase.
24096	7450794	228	16.9747	150	11.9753	1.41748	0.705476	0.87553	amino acid-polyamine transporter activity	Amino acid transporter protein	NA
11693	7449479	272	20.2505	179	14.2905	1.41707	0.705683	0.864041	NA	NA	NA
1954	7447635	117	8.71071	77	6.1473	1.417	0.705717	0.937099	NA	NA	NA
23624	7447196	629	46.8294	414	33.0517	1.41685	0.70579	0.817973	extracellular region	NA	NA
25292	7442141	237	17.6448	156	12.4543	1.41677	0.705833	0.873587	NA	NA	NA
268314	7443070	940	69.9835	619	49.4179	1.41616	0.706136	0.806296	NA	NA	NA
6192	7445947	41	3.05247	27	2.15555	1.4161	0.706164	1	NA	Nucleolar GTPase/ATPase p130	NA
23284	7444595	41	3.05247	27	2.15555	1.4161	0.706164	1	NA	Nucleolar GTPase/ATPase p130	NA
39696	7450427	173	12.8799	114	9.10119	1.41519	0.706618	0.900059	metabolism	Glucosamine 6-phosphate synthetases, contain amidotransferase and phosphosugar isomerase domains	Glutamine-fructose-6-phosphate transaminase (isomerizing).
9002	7449392	1343	99.987	885	70.654	1.41516	0.706632	0.799929	NA	Phytoene/squalene synthetase	NA
3310	7444073	801	59.6348	528	42.1529	1.41473	0.70685	0.813028	NA	NA	NA
24628	7445733	737	54.87	486	38.7998	1.41418	0.707122	0.816484	NA	Peroxisomal NUDIX hydrolase	NA
22253	7447946	329	24.4942	217	17.3242	1.41387	0.707277	0.855284	exo-alpha-sialidase activity	Transcription factor CA150	Exo-alpha-sialidase.
24656	7453036	47	3.49917	31	2.47489	1.41387	0.707277	1	protein folding	FOG: Armadillo/beta-catenin-like repeats	NA
3197	7444014	50	3.72252	33	2.63456	1.41296	0.707734	1	transcription factor activity	Heat shock transcription factor	NA
261548	7452504	356	26.5044	235	18.7612	1.41272	0.707854	0.851943	intracellular signaling cascade	Presenilin	Aspartic endopeptidases.
261158	7451490	206	15.3368	136	10.8576	1.41255	0.707942	0.888625	calcium ion binding	Voltage-gated Ca2+ channels, alpha1 subunits	NA
21707	7441712	2096	156.048	1384	110.492	1.41231	0.708061	0.797699	NA	NA	NA
268315	7443072	53	3.94588	35	2.79423	1.41215	0.708138	1	NA	NA	NA
24604	7445706	109	8.1151	72	5.74812	1.41178	0.708324	0.950236	magnesium ion binding	Nucleolar GTPase/ATPase p130	Glucan 1,4-alpha-glucosidase.
21429	7452440	1595	118.749	1054	84.1461	1.41122	0.708607	0.803217	NA	NA	NA
9092	7445828	59	4.39258	39	3.11357	1.41079	0.708824	0.994695	NA	Nuclear receptor coregulator SMRT/SMRTER, contains Myb-like domains	NA
24044	7450968	357	26.5788	236	18.8411	1.41069	0.708875	0.854743	NA	NA	NA
21122	7452178	301	22.4096	199	15.8872	1.41055	0.708945	0.865578	DNA binding	Sister chromatid cohesion protein SCC2/Nipped-B	NA
6174	7442339	266	19.8038	176	14.051	1.40943	0.709507	0.874318	NA	NA	NA
20584	7451489	467	34.7684	309	24.669	1.40939	0.709525	0.842032	NA	NA	NA
24585	7450554	234	17.4214	155	12.3744	1.40786	0.7103	0.884602	NA	SNARE protein TLG1/Syntaxin 6	NA
9173	7447588	483	35.9596	320	25.5472	1.40757	0.710442	0.843163	NA	NA	NA
31145	7449087	403	30.0035	267	21.3159	1.40756	0.710448	0.852345	ATP binding	Cytoplasmic exosomal RNA helicase SKI2, DEAD-box superfamily	In phosphorous-containing anhydrides.
270233	7443860	249	18.5382	165	13.1728	1.40731	0.710576	0.881024	NA	NA	NA
268220	7448699	140	10.4231	93	7.42466	1.40385	0.712329	0.93167	proteolysis and peptidolysis	NA	NA
11575	7447752	289	21.5162	192	15.3283	1.40369	0.712409	0.875995	NA	NA	NA
7727	7452873	882	65.6653	586	46.7833	1.40361	0.712451	0.827541	NA	Leucine rich repeat proteins, some proteins contain F-box	NA
20874	7446781	149	11.0931	99	7.90367	1.40354	0.712483	0.926027	ATP binding	Predicted transporter (ABC superfamily)	NA
262247	7451911	850	63.2829	565	45.1068	1.40296	0.71278	0.829581	metabolism	Chitinase	Chitinase.
269057	7443583	1578	117.483	1049	83.7469	1.40283	0.712844	0.81672	phosphoglycerate kinase activity	3-phosphoglycerate kinase	Phosphoglycerate kinase.
24627	7445732	922	68.6434	613	48.9389	1.40263	0.712944	0.827897	NA	Galactosyltransferases	NA
22969	7451116	433	32.2371	288	22.9925	1.40207	0.713231	0.856753	NA	NA	NA
31785	7443050	1295	96.4134	862	68.8178	1.401	0.713778	0.823011	NA	Putative transcriptional regulator DJ-1	NA
25290	7442138	530	39.4588	353	28.1818	1.40015	0.714208	0.85026	NA	Nucleolar GTPase/ATPase p130	NA
9566	7450498	24	1.78681	16	1.27736	1.39883	0.714882	1	NA	FOG: Ankyrin repeat	NA
1116	7449786	12	0.893406	8	0.63868	1.39883	0.714882	1	NA	Predicted methyltransferase	NA
8063	7453050	12	0.893406	8	0.63868	1.39883	0.714882	1	metabolism	Reductases with broad range of substrate specificities	3-oxoacyl-[acyl-carrier protein] reductase.
4027	7443842	12	0.893406	8	0.63868	1.39883	0.714882	1	NA	NA	NA
11941	7448243	12	0.893406	8	0.63868	1.39883	0.714882	1	NA	Nucleolar GTPase/ATPase p130	NA
1972	7452569	12	0.893406	8	0.63868	1.39883	0.714882	1	triacylglycerol lipase activity	Predicted lipase/calmodulin-binding heat-shock protein	NA
38726	7449472	12	0.893406	8	0.63868	1.39883	0.714882	1	NA	FOG: Leucine rich repeat	NA
36337	7451070	192	14.2945	128	10.2189	1.39883	0.714882	0.909354	NA	Membrane coat complex Retromer, subunit VPS35	NA
4800	7451346	195	14.5178	130	10.3786	1.39883	0.714882	0.908148	NA	NA	NA
261839	7441905	18	1.34011	12	0.95802	1.39883	0.714882	1	ATP binding	ATP-dependent RNA helicase pitchoune	NA
2622	7446650	18	1.34011	12	0.95802	1.39883	0.714882	1	calcium ion binding	NA	NA
9189	7447997	18	1.34011	12	0.95802	1.39883	0.714882	1	NA	Myosin class II heavy chain	NA
9730	7451189	18	1.34011	12	0.95802	1.39883	0.714882	1	NA	NA	NA
5545	7448144	18	1.34011	12	0.95802	1.39883	0.714882	1	protein binding	NA	NA
264481	7450920	18	1.34011	12	0.95802	1.39883	0.714882	1	NA	NA	NA
26457	7447802	51	3.79698	34	2.71439	1.39883	0.714882	1	electron transport	Pyridine nucleotide-disulphide oxidoreductase	NA
23593	7450568	33	2.45687	22	1.75637	1.39883	0.714882	1	NA	NA	NA
10814	7442939	33	2.45687	22	1.75637	1.39883	0.714882	1	NA	NA	NA
13909	7444590	33	2.45687	22	1.75637	1.39883	0.714882	1	GTPase activity	Endocytosis/signaling protein EHD1	Thymidylate synthase.
24159	7445872	162	12.061	108	8.62218	1.39883	0.714882	0.923461	protein binding	NA	NA
6017	7448563	15	1.11676	10	0.79835	1.39883	0.714882	1	NA	NA	NA
4363	7447908	15	1.11676	10	0.79835	1.39883	0.714882	1	NA	NA	NA
34992	7448584	15	1.11676	10	0.79835	1.39883	0.714882	1	NA	Adenylate cyclase-associated protein (CAP/Srv2p)	NA
269273	7450674	72	5.36044	48	3.83208	1.39883	0.714882	0.985107	NA	NA	NA
22570	7449654	36	2.68022	24	1.91604	1.39883	0.714882	1	transcription factor activity	Heat shock transcription factor	NA
31764	7452331	36	2.68022	24	1.91604	1.39883	0.714882	1	NA	Predicted membrane protein, contains two CBS domains	NA
262125	7453154	36	2.68022	24	1.91604	1.39883	0.714882	1	electron transport	Sulfite reductase (ferredoxin)	Ferredoxin--nitrite reductase.
35350	7450711	42	3.12692	28	2.23538	1.39883	0.714882	1	protein kinase activity	Tyrosine kinase specific for activated (GTP-bound) p21cdc42Hs	NA
264672	7448492	21	1.56346	14	1.11769	1.39883	0.714882	1	regulation of cell cycle	CDC45 (cell division cycle 45)-like protein	NA
4159	7446764	27	2.01016	18	1.43703	1.39883	0.714882	1	NA	NA	NA
1512	7451552	144	10.7209	96	7.66416	1.39883	0.714882	0.934215	NA	NA	NA
4184	7446778	30	2.23351	20	1.5967	1.39883	0.714882	1	cell adhesion	von Willebrand factor and related coagulation proteins	Glucan 1,4-alpha-glucosidase.
34973	7448610	30	2.23351	20	1.5967	1.39883	0.714882	1	catalytic activity	Dipeptidyl aminopeptidases/acylaminoacyl-peptidases	Dipeptidyl-peptidase IV.
22337	7446142	6	0.446703	4	0.31934	1.39883	0.714882	1	NA	NA	NA
3299	7444068	6	0.446703	4	0.31934	1.39883	0.714882	1	NA	NA	NA
3318	7444077	6	0.446703	4	0.31934	1.39883	0.714882	1	NA	NA	NA
5168	7451765	6	0.446703	4	0.31934	1.39883	0.714882	1	NA	Nucleolar GTPase/ATPase p130	NA
7935	7449291	6	0.446703	4	0.31934	1.39883	0.714882	1	NA	NA	NA
10556	7450334	6	0.446703	4	0.31934	1.39883	0.714882	1	ATP binding	NA	NA
37040	7446955	6	0.446703	4	0.31934	1.39883	0.714882	1	ubiquitin ligase complex	Anaphase-promoting complex (APC), subunit 11	Ubiquitin--protein ligase.
7627	7452824	6	0.446703	4	0.31934	1.39883	0.714882	1	NA	Uncharacterized conserved protein	NA
19637	7444640	6	0.446703	4	0.31934	1.39883	0.714882	1	calcium ion binding	NA	NA
262720	7448406	6	0.446703	4	0.31934	1.39883	0.714882	1	signal transducer activity	NA	NA
22961	7442334	9	0.670054	6	0.47901	1.39883	0.714882	1	electron transport	NA	NA
4948	7452270	9	0.670054	6	0.47901	1.39883	0.714882	1	NA	NA	NA
32779	7451329	9	0.670054	6	0.47901	1.39883	0.714882	1	ATP binding	Predicted GTPase	NA
33096	7448729	9	0.670054	6	0.47901	1.39883	0.714882	1	NA	Uncharacterized conserved protein	NA
260965	7445141	9	0.670054	6	0.47901	1.39883	0.714882	1	NA	NA	NA
34403	7453228	9	0.670054	6	0.47901	1.39883	0.714882	1	microtubule motor activity	Kinesin-like protein	NA
9998	7451597	9	0.670054	6	0.47901	1.39883	0.714882	1	protein binding	Voltage-gated A-type K+ channel KCND	NA
3577	7441909	9	0.670054	6	0.47901	1.39883	0.714882	1	NA	NA	NA
16612	7448752	9	0.670054	6	0.47901	1.39883	0.714882	1	oxidoreductase activity	Predicted oxidoreductase	NA
14707	7452826	9	0.670054	6	0.47901	1.39883	0.714882	1	microtubule motor activity	Kinesin-like protein	Plus-end-directed kinesin ATPase.
264866	7449426	9	0.670054	6	0.47901	1.39883	0.714882	1	protein kinase activity	Ca2+/calmodulin-dependent protein kinase, EF-Hand protein superfamily	NA
22801	7453226	3	0.223351	2	0.15967	1.39883	0.714882	1	tRNA ligase activity	NA	NA
35690	7446213	3	0.223351	2	0.15967	1.39883	0.714882	1	RNA binding	Phosphoadenosine phosphosulfate reductase	NA
9207	7443180	3	0.223351	2	0.15967	1.39883	0.714882	1	NA	NA	NA
6759	7446211	3	0.223351	2	0.15967	1.39883	0.714882	1	NA	NA	NA
8281	7451044	3	0.223351	2	0.15967	1.39883	0.714882	1	NA	NA	NA
263118	7449182	3	0.223351	2	0.15967	1.39883	0.714882	1	ATP binding	Transporter, ABC superfamily (Breast cancer resistance protein)	NA
5114	7449676	3	0.223351	2	0.15967	1.39883	0.714882	1	NA	NA	NA
1515	7449139	3	0.223351	2	0.15967	1.39883	0.714882	1	NA	NifU-like domain-containing proteins	NA
32661	7451281	3	0.223351	2	0.15967	1.39883	0.714882	1	damaged DNA binding	Mismatch repair ATPase MSH2 (MutS family)	NA
262632	7442272	3	0.223351	2	0.15967	1.39883	0.714882	1	NA	UDP-Gal:glucosylceramide beta-1,4-galactosyltransferase	NA
14096	7443520	3	0.223351	2	0.15967	1.39883	0.714882	1	transport	Ammonia permease	NA
31722	7452173	3	0.223351	2	0.15967	1.39883	0.714882	1	chromatin	HMG box-containing protein	NA
7372	7443440	3	0.223351	2	0.15967	1.39883	0.714882	1	trypsin activity	Trypsin	Acrosin.
8952	7449364	3	0.223351	2	0.15967	1.39883	0.714882	1	metabolism	Glucosamine 6-phosphate synthetases, contain amidotransferase and phosphosugar isomerase domains	Glutamine-fructose-6-phosphate transaminase (isomerizing).
8509	7450737	3	0.223351	2	0.15967	1.39883	0.714882	1	NA	NA	NA
261261	7442252	3	0.223351	2	0.15967	1.39883	0.714882	1	regulation of GTPase activity	Predicted GTPase-activating protein	NA
262980	7442757	3	0.223351	2	0.15967	1.39883	0.714882	1	ATP binding	ATP-dependent RNA helicase A	NA
14942	7452501	3	0.223351	2	0.15967	1.39883	0.714882	1	microtubule motor activity	Kinesin (KAR3 subfamily)	NA
7551	7445587	3	0.223351	2	0.15967	1.39883	0.714882	1	regulation of GTPase activity	ADP-ribosylation factor GTPase activator	NA
4866	7452229	3	0.223351	2	0.15967	1.39883	0.714882	1	NA	U5 snRNP spliceosome subunit	NA
7378	7443443	3	0.223351	2	0.15967	1.39883	0.714882	1	NA	Protein phosphatase 1, regulatory subunit, and related proteins	NA
3788	7445333	3	0.223351	2	0.15967	1.39883	0.714882	1	NA	NA	NA
7202	7450713	3	0.223351	2	0.15967	1.39883	0.714882	1	NA	NA	NA
3551	7441896	3	0.223351	2	0.15967	1.39883	0.714882	1	NA	NA	NA
10093	7441976	3	0.223351	2	0.15967	1.39883	0.714882	1	monooxygenase activity	Kynurenine 3-monooxygenase and related flavoprotein monooxygenases	Kynurenine 3-monooxygenase.
3463	7451664	2147	159.845	1432	114.324	1.39818	0.715215	0.820054	NA	NA	NA
263061	7446610	760	56.5824	507	40.4763	1.39791	0.715353	0.840714	superoxide dismutase activity	Manganese superoxide dismutase	NA
7193	7447149	445	33.1305	297	23.711	1.39726	0.715686	0.862554	heparin-glucosamine 3-O-sulfotransferase activity	Heparan sulfate D-glucosaminyl 3-O-sulfotransferase	Heparin-glucosamine 3-O-sulfotransferase.
5167	7449706	433	32.2371	289	23.0723	1.39722	0.715708	0.863827	NA	Chitinase	NA
21850	7441944	331	24.6431	221	17.6435	1.39672	0.715962	0.876852	regulation of cell cycle	G1/S-specific cyclin D	NA
21083	7449098	958	71.3236	640	51.0944	1.39592	0.716375	0.837503	NA	NA	NA
25651	7447751	452	33.6516	302	24.1102	1.39574	0.716464	0.86393	NA	Uncharacterized conserved protein	NA
5485	7453197	1148	85.4692	768	61.3133	1.39397	0.717373	0.836529	NA	NA	NA
263945	7443203	136	10.1253	91	7.26499	1.39371	0.717511	0.945074	molecular function unknown	Predicted esterase of the alpha-beta hydrolase superfamily (Neuropathy target esterase), contains cAMP-binding domains	NA
24511	7445846	529	39.3843	354	28.2616	1.39356	0.717585	0.860407	NA	NA	NA
7188	7450705	620	46.1593	415	33.1315	1.39321	0.717765	0.854779	transmembrane receptor activity	Serine/threonine protein kinase	NA
21771	7451672	1983	147.635	1328	106.021	1.39251	0.718127	0.830124	NA	NA	NA
23247	7442765	327	24.3453	219	17.4839	1.39244	0.718162	0.882621	NA	von Willebrand factor and related coagulation proteins	NA
24445	7449393	515	38.342	345	27.5431	1.39207	0.718353	0.863638	NA	Putative transcription factor HALR/MLL3, involved in embryonic development	NA
1554	7443120	94	6.99835	63	5.02961	1.39143	0.718685	0.970869	NA	Predicted endo-1,3-beta-glucanase	NA
268324	7446695	91	6.77499	61	4.86994	1.39119	0.71881	0.973026	integral to membrane	Inner membrane protein translocase involved in respiratory chain assembly	NA
33985	7448794	88	6.55164	59	4.71027	1.39093	0.718944	0.97529	pseudouridylate synthase activity	Pseudouridylate synthase	tRNA-pseudouridine synthase I.
2303	7446498	170	12.6566	114	9.10119	1.39065	0.719088	0.928234	NA	Phosphatidylinositol transfer protein PDR16 and related proteins	NA
21583	7442430	340	25.3132	228	18.2024	1.39065	0.719088	0.882823	exo-alpha-sialidase activity	Chitinase	Exo-alpha-sialidase.
1553	7443119	1072	79.8109	719	57.4014	1.3904	0.719217	0.843659	protein kinase activity	cGMP-dependent protein kinase	NA
22135	7447449	243	18.0915	163	13.0131	1.39025	0.719295	0.902347	transcription factor activity	Heat shock transcription factor	NA
262153	7447934	79	5.88159	53	4.23126	1.39003	0.719407	0.982809	metabolism	Chitinase	Chitinase.
6095	7448600	152	11.3165	102	8.14317	1.38969	0.719586	0.938959	NA	NA	NA
21069	7446810	70	5.21153	47	3.75225	1.38891	0.719989	0.991637	binding	Mitochondrial oxoglutarate/malate carrier proteins	NA
6894	7449208	923	68.7178	620	49.4977	1.3883	0.720304	0.850458	NA	NA	NA
19069	7443900	192	14.2945	129	10.2987	1.38799	0.720467	0.921483	NA	NA	NA
21831	7441924	61	4.54148	41	3.27324	1.38746	0.720742	1	NA	NA	NA
7672	7452846	58	4.31813	39	3.11357	1.38688	0.721045	1	NA	NA	NA
24699	7447857	3392	252.536	2281	182.104	1.38677	0.7211	0.834439	NA	Serine/threonine protein kinase	NA
22790	7453220	2437	181.436	1640	130.929	1.38575	0.721629	0.838856	histone acetyltransferase activity	FOG: Zn-finger	Histone acetyltransferase.
3934	7452111	156	11.6143	105	8.38268	1.38551	0.721756	0.941172	protein kinase activity	Protein kinase containing WD40 repeats	Protein kinase.
5051	7448474	150	11.1676	101	8.06334	1.38498	0.722031	0.945202	NA	NA	NA
21922	7449560	49	3.64807	33	2.63456	1.3847	0.722177	1	exo-alpha-sialidase activity	Chitinase	Exo-alpha-sialidase.
1704	7445538	49	3.64807	33	2.63456	1.3847	0.722177	1	ATP binding	Putative arsenite-translocating ATPase	Arsenite-transporting ATPase.
10803	7442181	49	3.64807	33	2.63456	1.3847	0.722177	1	transcription factor activity	Heat shock transcription factor	NA
4100	7442044	772	57.4758	520	41.5142	1.38448	0.72229	0.861303	NA	NA	NA
10778	7450928	285	21.2184	192	15.3283	1.38426	0.722407	0.899809	NA	Transcriptional corepressor Atrophin-1/DRPLA	NA
23577	7447155	1367	101.774	921	73.528	1.38415	0.722465	0.848997	NA	Diadenosine and diphosphoinositol polyphosphate phosphohydrolase	NA
22075	7446731	325	24.1964	219	17.4839	1.38393	0.722581	0.893219	oxidoreductase activity	Predicted haloacid-halidohydrolase and related hydrolases	NA
2287	7448703	371	27.6211	250	19.9588	1.38391	0.72259	0.886911	NA	NA	NA
2206	7448651	365	27.1744	246	19.6394	1.38367	0.722717	0.88795	nucleic acid binding	Splicing factor 1/branch point binding protein (RRM superfamily)	NA
22214	7447916	5184	385.951	3496	279.103	1.38283	0.723156	0.838254	NA	NA	NA
33182	7452744	43	3.20137	29	2.31522	1.38275	0.723195	1	protein kinase activity	Serine/threonine protein kinase Chk2 and related proteins	NA
2928	7452902	86	6.40274	58	4.63043	1.38275	0.723195	0.980791	NA	von Willebrand factor and related coagulation proteins	NA
10073	7441964	388	28.8868	262	20.9168	1.38103	0.724095	0.888474	NA	NA	NA
263644	7446005	151	11.242	102	8.14317	1.38055	0.724351	0.949398	DNA binding	DNA topoisomerase type II	DNA topoisomerase (ATP-hydrolysing).
8086	7448083	1190	88.5961	804	64.1873	1.38027	0.724494	0.857737	NA	NA	NA
7153	7450687	37	2.75467	25	1.99588	1.38018	0.724543	1	NA	Ferredoxin	NA
33407	7451934	37	2.75467	25	1.99588	1.38018	0.724543	1	signal transducer activity	K+-channel ERG and related proteins, contain PAS/PAC sensor domain	NA
3323	7444722	309	23.0052	209	16.6855	1.37875	0.725293	0.902066	NA	NA	NA
511	7451172	748	55.689	506	40.3965	1.37856	0.725395	0.870063	GTP binding	Predicted GTP-binding protein (ODN superfamily)	NA
7374	7452402	34	2.53132	23	1.83621	1.37856	0.725395	1	exo-alpha-sialidase activity	Serine proteinase inhibitor (KU family) with thrombospondin repeats	Exo-alpha-sialidase.
24199	7446862	34	2.53132	23	1.83621	1.37856	0.725395	1	NA	NA	NA
916	7451520	34	2.53132	23	1.83621	1.37856	0.725395	1	nucleic acid binding	Histone acetyltransferase SAGA/ADA, catalytic subunit PCAF/GCN5 and related proteins	NA
22021	7443820	569	42.3623	385	30.7365	1.37824	0.725562	0.877931	metabolism	Nucleolar GTPase/ATPase p130	NA
23672	7452411	849	63.2085	575	45.9051	1.37694	0.72625	0.869302	S-adenosylmethionine-dependent methyltransferase activity	NA	NA
1820	7447645	31	2.30797	21	1.67654	1.37663	0.726413	1	NA	NA	NA
10158	7442008	124	9.23186	84	6.70614	1.37663	0.726413	0.962848	NA	NA	NA
7081	7447095	304	22.6329	206	16.446	1.3762	0.72664	0.906007	NA	NA	NA
24534	7447993	950	70.728	644	51.4137	1.37566	0.726922	0.86869	ubiquitin ligase complex	Predicted E3 ubiquitin ligase	NA
2063	7445079	118	8.78516	80	6.3868	1.37552	0.726999	0.966058	NA	NA	NA
24902	7452731	1050	78.173	712	56.8425	1.37526	0.727137	0.867402	ubiquitin ligase complex	E3 ubiquitin ligase	NA
7495	7445560	395	29.4079	268	21.3958	1.37447	0.727551	0.895851	NA	NA	NA
11640	7443644	252	18.7615	171	13.6518	1.37429	0.727648	0.918814	NA	NA	NA
7554	7445589	28	2.08461	19	1.51687	1.37429	0.727648	1	NA	Nucleolar GTPase/ATPase p130	NA
262936	7453267	28	2.08461	19	1.51687	1.37429	0.727648	1	amino acid-polyamine transporter activity	Amino acid transporter protein	NA
31052	7451496	28	2.08461	19	1.51687	1.37429	0.727648	1	protein kinase activity	Ca2+/calmodulin-dependent protein kinase, EF-Hand protein superfamily	Phosphotransferases with an alcohol group as acceptor.
25897	7448935	140	10.4231	95	7.58433	1.37429	0.727648	0.958094	exo-alpha-sialidase activity	Nucleolar GTPase/ATPase p130	Exo-alpha-sialidase.
2160	7442221	3137	233.551	2129	169.969	1.37408	0.727758	0.855838	NA	HSP90 co-chaperone p23	NA
1173	7453469	632	47.0527	429	34.2492	1.37383	0.72789	0.88052	transcription factor activity	Heat shock transcription factor	NA
269333	7450111	1812	134.904	1230	98.1971	1.37381	0.727902	0.861609	NA	H+/oligopeptide symporter	NA
263266	7447166	109	8.1151	74	5.90779	1.37363	0.727999	0.971379	NA	NA	NA
[truncated: 7,573 more rows]
